# Supplementary material for: Xanthrysols A–D, novel meroterpenoids with antiviral activities from Xanthostemon chrysanthus
Source: Royal Society of Chemistry journal article supplement (doi:10.1039/d4qo00520a), 2024-01-01
Supplement: d4qo00520a1.pdf [file d4qo00520a1.pdf]

## Supporting Information

### **Xanthrysols A–D, Novel Meroterpenoids with Antiviral Activities from *Xanthostemon chrysanthus*†**

Fen Liu,<sup>‡a,c</sup> Ji-Hong Gu,<sup>‡b</sup> Zi-Yue Zhang<sup>a</sup>, Qiong Zhan<sup>a</sup>, Hai-Xia Yang<sup>a</sup>, Yun Hu<sup>a</sup>, Jin-Yan Zhang<sup>a</sup>, Wei Tang<sup>\*a</sup>, Wen-Cai Ye,<sup>\*a</sup> and Lei Wang<sup>\*a</sup>

<sup>a</sup>State Key Laboratory of Bioactive Molecules and Druggability Assessment, Center for Bioactive Natural Molecules and Innovative Drugs Research, College of Pharmacy, Jinan University, and Center for Natural Bioactive Molecules and Innovative Drugs, College of Pharmacy, Jinan University, Guangzhou 510632, P. R. China.

<sup>b</sup>Science and Technology Innovation Center, Guangzhou University of Chinese Medicine, Guangzhou 510405, P. R. China.

<sup>c</sup>Key Laboratory of Medicinal Resources Chemistry and Pharmacology in Wuling Mountainous of Hunan Province College, Jishou University, Jishou 416000, P. R. China.

---

\*Corresponding authors. Tel./fax: + 86 20 85223553.

*E-mail addresses:* [cpuwanglei@126.com](mailto:cpuwanglei@126.com) (L. Wang), [chywc@aliyun.com](mailto:chywc@aliyun.com) (W.-C. Ye), [tangw@jnu.edu.cn](mailto:tangw@jnu.edu.cn) (W. Tang).

## Table of Contents

|   |                                                                |    |
|---|----------------------------------------------------------------|----|
| 1 | General experimental procedures .....                          | S3 |
| 2 | Plant materials.....                                           | S3 |
| 3 | Extraction and isolation .....                                 | S3 |
| 4 | X-Ray Crystallographic analyses of <b>3</b> and <b>4</b> ..... | S5 |
| 5 | Antiviral effect assay .....                                   | S6 |
| 6 | Chiral separation of <b>1–4</b> .....                          | S7 |
| 7 | Quantum chemical ECD calculations of <b>1–4</b> .....          | S9 |

### For Compounds **1–4**

|               |                                                              |     |
|---------------|--------------------------------------------------------------|-----|
| Fig. S9.      | UV spectrum of <b>1</b> in MeOH.....                         | S32 |
| Fig. S10.     | IR (KBr disc) spectrum of <b>1</b> .....                     | S32 |
| Fig. S11.     | HR-ESI-MS spectrum of <b>1</b> .....                         | S33 |
| Fig. S12–S18. | 1D and 2D NMR spectra of <b>1</b> in CDCl <sub>3</sub> ..... | S33 |
| Fig. S19.     | UV spectrum of <b>2</b> in MeOH.....                         | S37 |
| Fig. S20.     | IR (KBr disc) spectrum of <b>2</b> .....                     | S37 |
| Fig. S21.     | HR-ESI-MS spectrum of <b>2</b> .....                         | S38 |
| Fig. S22–S28. | 1D and 2D NMR spectra of <b>2</b> in CDCl <sub>3</sub> ..... | S38 |
| Fig. S29.     | UV spectrum of <b>3</b> in MeOH.....                         | S42 |
| Fig. S30.     | IR (KBr disc) spectrum of <b>3</b> .....                     | S42 |
| Fig. S31.     | HR-ESI-MS spectrum of <b>3</b> .....                         | S43 |
| Fig. S32–S38. | 1D and 2D NMR spectra of <b>3</b> in CDCl <sub>3</sub> ..... | S43 |
| Fig. S39.     | UV spectrum of <b>4</b> in MeOH.....                         | S47 |
| Fig. S40.     | IR (KBr disc) spectrum of <b>4</b> .....                     | S47 |
| Fig. S41.     | HR-ESI-MS spectrum of <b>4</b> .....                         | S48 |
| Fig. S42–S48. | 1D and 2D NMR spectra of <b>4</b> in CDCl <sub>3</sub> ..... | S48 |
| References    | .....                                                        | S52 |

## 1 General experimental procedures

Melting points were obtained on an X-5 micro melting point apparatus without correction (Fukai Instrument, Beijing, China). Optical rotations were measured on a JASCO P-2000 digital polarimeter (Jasco, Tokyo, Japan). UV spectra were recorded on a JASCO V-550 UV–vis spectrophotometer (Jasco, Tokyo, Japan). IR spectra were determined on a JASCO FT/IR-4600 plus Fourier transform infrared spectrometer (Jasco, Tokyo, Japan) using KBr pellets. ECD spectra were obtained on a Chirascan Plus qCD spectropolarimeter (Applied Photophysics Limited, Leatherhead, UK). HR-ESI-MS were obtained on an Agilent 6210 ESI-TOF mass spectrometer (Agilent Technologies, CA, USA). NMR spectra were measured on a Bruker AV-500 spectrometer (Bruker, Fällanden, Switzerland). Single-crystal data were performed using an Agilent Gemini S Ultra diffractometer and Cu K $\alpha$  radiation ( $\lambda = 1.54178 \text{ \AA}$ ). Column chromatography (CC) was carried out on a silica gel (200–300 mesh, Qingdao Marine Chemical Inc., Qingdao, China), ODS (Merck, Darmstadt, Germany), or Sephadex LH-20 (Pharmacia Biotec AB, Uppsala, Sweden). Preparative HPLC was performed on an Agilent system equipped with a semipreparative column (Phenomenex C18,  $10 \times 250 \text{ mm}^2$ ). The chiral separation was carried out using Phenomenex Lux Cellulose-1 and Industries ChromegaChiral CC4 ( $250 \times 4.6 \text{ mm}$ ,  $5 \mu\text{m}$ ) ( $4.6 \times 250 \text{ mm}^2$ ) chiral HPLC columns. All solvents used in CC and HPLC were of analytical (Shanghai Chemical Plant, Shanghai, China)

## 2 Plant materials

The leaves of *X. chrysanthus* were collected in Guangzhou city of P. R. China in October of 2016 and identified by Prof. Guang-Xiong Zhou (Jinan University). A voucher specimen (No. 2016100501) has been deposited in the Center for Bioactive Natural Molecules and Innovative Drugs Research, Jinan University, Guangzhou, P. R. China.

## 3 Extraction and isolation

The air-dried leaves of *X. chrysanthus* (20 kg) were powdered and extracted with 95% EtOH for 4 times at room temperature. The crude extract (3.0 kg) was suspended in H<sub>2</sub>O and extracted with petroleum ether (PE). The PE extract (930 g) was subjected to a silica gel CC eluted with a gradient mixture of PE/EtOAc (100:0  $\rightarrow$  0:100) to afford

ten fractions (Fr.1–10). Fr.2 (45 g) was separated on Sephadex LH-20 (6 × 160 cm, CH<sub>3</sub>OH/CH<sub>2</sub>Cl<sub>2</sub>, 1:1) to yield four fractions (Fr.2A–2D). Fr.2B (32 g) was subjected to ODS column chromatography using CH<sub>3</sub>OH/H<sub>2</sub>O (60:40 → 100:0) as eluent to yield Fr.2B.1–Fr.2B.40. Fr.2B.30 was separated on Sephadex LH-20 (1 × 100 cm, CH<sub>3</sub>OH) and further purified by reversed-phase HPLC (CH<sub>3</sub>CN/H<sub>2</sub>O, 85:15, 3 mL/min) to afford compound **1** (12.0 mg, *t<sub>R</sub>* = 16 min). Fr.3 (40 g) was separated on Sephadex LH-20 (6 × 160 cm, CH<sub>3</sub>OH) to yield four fractions (Fr.3A–3D). Fr.3B–3D (35 g) was subjected to ODS column chromatography using CH<sub>3</sub>OH/H<sub>2</sub>O (60:40 → 100:0) as eluent to yield Fr.3B.1–Fr.3B.60. Fr.3B.20 was separated on Sephadex LH-20 (1 × 100 cm, CH<sub>3</sub>OH) and further purified by reversed-phase HPLC (CH<sub>3</sub>CN/H<sub>2</sub>O, 75:25, 3 mL/min) to afford compounds **2** (50.2 mg, *t<sub>R</sub>* = 12 min), **3** (20.5 mg, *t<sub>R</sub>* = 14 min), and **4** (11.2 mg, *t<sub>R</sub>* = 11 min). Fr.9 (60.7 g) was repeatedly chromatographed using silica gel CC to yield nine subfractions (Fr.9A–9I). Fr.9D (10.2 g) was subjected to ODS column chromatography using CH<sub>3</sub>OH/H<sub>2</sub>O (40:60 → 100:0) as an eluent to yield Fr.9D.1–Fr.9D.40. Fr.9D.5 was further purified by semipreparative HPLC (CH<sub>3</sub>CN/H<sub>2</sub>O, 60:40, 3 mL/min) to afford compounds **5** (20 mg) and **6** (100 mg).

**Xanthrysol A (1).** Yellowish oil (CH<sub>3</sub>OH); (+)-**1** [ $\alpha$ ]<sub>D</sub><sup>26</sup> + 58.9 (*c* 0.9, CH<sub>3</sub>OH), ECD (CH<sub>3</sub>CN)  $\lambda_{\max}$  ( $\Delta\epsilon$ ) 212 (−67.7), 248 (+14.3), 284 (+30.2), 368 (+4.0); (−)-**1** [ $\alpha$ ]<sub>D</sub><sup>26</sup> −58.7 (*c* 0.8, CH<sub>3</sub>OH), ECD (CH<sub>3</sub>CN)  $\lambda_{\max}$  ( $\Delta\epsilon$ ) 212 (+67.7), 248 (−14.3), 284 (−30.2), 368 (−4.0); UV (CH<sub>3</sub>OH)  $\lambda_{\max}$  (log  $\epsilon$ ) 207 (3.40), 290 (3.07) nm; IR (KBr)  $\nu_{\max}$  3453, 2927, 1726, 1628, 1435, 1308, 1121, 969, 697, 504 cm<sup>−1</sup>; HR-ESI-MS *m/z* 535.2694 [M+H]<sup>+</sup> (calcd for C<sub>32</sub>H<sub>39</sub>O<sub>7</sub>, 535.2690).

**Xanthrysol B (2).** Yellowish oil (CH<sub>3</sub>OH); (+)-**2** [ $\alpha$ ]<sub>D</sub><sup>26</sup> + 62.9 (*c* 1.0, CH<sub>3</sub>OH), ECD (CH<sub>3</sub>CN)  $\lambda_{\max}$  ( $\Delta\epsilon$ ) 201 (+21.8), 218 (−7.2), 238 (−3.3), 285(+3.2), 373 (+1.4); (−)-**2** [ $\alpha$ ]<sub>D</sub><sup>26</sup> −70.5 (*c* 1.0, CH<sub>3</sub>OH), ECD (CH<sub>3</sub>CN)  $\lambda_{\max}$  ( $\Delta\epsilon$ ) 203 (−22.8), 218 (+6.6), 238 (+2.8), 285(−4.1), 373 (−2.1); UV (CH<sub>3</sub>OH)  $\lambda_{\max}$  (log  $\epsilon$ ) 207 (4.38), 291 (3.83), 369 (3.09) nm; IR (KBr)  $\nu_{\max}$  3127, 2940, 1682, 1444, 1385, 1211, 1141, 844, 803, 725, 699, 601, 557, 519, 475, 431 cm<sup>−1</sup>; HR-ESI-MS *m/z* 537.2844 [M+H]<sup>+</sup> (calcd for C<sub>32</sub>H<sub>41</sub>O<sub>7</sub>, 537.2847).

**Xanthrysol C (3).** Yellowish blocks (CH<sub>3</sub>OH); ); m.p. 110~112 °C; (+)-**3** [ $\alpha$ ]<sub>D</sub><sup>26</sup> + 46.7 (*c* 1.0, CH<sub>3</sub>OH), ECD (CH<sub>3</sub>CN)  $\lambda_{\max}$  ( $\Delta\epsilon$ ) 223 (+20.1), 255 (+2.0), 291(−4.0), 348

(-0.9); (-)-**3**  $[\alpha]_D^{26}$  -42.5 (*c* 1.0, CH<sub>3</sub>OH), ECD (CH<sub>3</sub>CN)  $\lambda_{\max}$  ( $\Delta\epsilon$ ) 223 (-19.4), 255 (-2.4), 291(+3.1), 348 (+0.5); UV (CH<sub>3</sub>OH)  $\lambda_{\max}$  (log  $\epsilon$ ) 209 (5.51), 290 (5.03), 369 (4.34) nm; IR (KBr)  $\nu_{\max}$  3419, 2930, 1698, 1628, 1430, 1379, 1250, 1142, 749, 699 cm<sup>-1</sup>; HR-ESI-MS *m/z* 559.2663 [M+Na]<sup>+</sup> (calcd for C<sub>32</sub>H<sub>40</sub>NaO<sub>7</sub>, 559.2666).

**Xanthrysol D (4)**. Yellowish blocks (CH<sub>3</sub>OH); m.p. 130~132 °C; (+)-**4**  $[\alpha]_D^{26}$  + 56.5 (*c* 0.2, CH<sub>3</sub>OH), ECD (CH<sub>3</sub>CN)  $\lambda_{\max}$  ( $\Delta\epsilon$ ) 220 (-7.3), 289 (+3.8), 369 (+1.9); (-)-**4**  $[\alpha]_D^{26}$  -52.8 (*c* 0.2, CH<sub>3</sub>OH), ECD (CH<sub>3</sub>CN)  $\lambda_{\max}$  ( $\Delta\epsilon$ ) 220 (+6.5), 289 (-2.6), 369 (-1.2); UV (CH<sub>3</sub>OH)  $\lambda_{\max}$  (log  $\epsilon$ ) 207 (4.22), 290 (3.65), 369 (2.83) nm; IR (KBr)  $\nu_{\max}$  3415, 2922, 1685, 1633, 1618, 1427, 1376, 1302, 1257, 1125, 1062, 956, 742, 701 cm<sup>-1</sup>; HR-ESI-MS *m/z* 557.2559 [M+Na]<sup>+</sup> (calcd for C<sub>32</sub>H<sub>38</sub>NaO<sub>7</sub>, 557.2510).

**Myrigalone G (5)**. Amorphous powder (CH<sub>3</sub>OH); HR-ESI-MS *m/z* 287.1272 [M + H]<sup>+</sup> (calcd for C<sub>17</sub>H<sub>19</sub>O<sub>4</sub>, 287.1278); <sup>1</sup>H NMR (400 MHz, CDCl<sub>3</sub>)  $\delta$  7.28 (4H, overlapped), 7.19 (1H, m), 5.96 (1H, s), 3.82 (3H, s), 3.42 (2H, d, *J* = 7.6 Hz), 3.03 (2H, d, *J* = 7.6 Hz), 2.01 (3H, s) ppm; <sup>13</sup>C NMR (100 MHz, CDCl<sub>3</sub>)  $\delta$  204.9, 161.4, 163.4, 159.8, 141.8, 128.6 (×4), 126.1, 104.7, 103.5, 91.6, 55.8, 45.9, 30.8, 7.2 ppm.

**(E, E)-farnesoic acid (6)**. Yellowish oil (CH<sub>3</sub>OH); HR-ESI-MS *m/z* 237.1852 [M + H]<sup>+</sup> (calcd for C<sub>15</sub>H<sub>25</sub>O<sub>2</sub>, 237.1849); <sup>1</sup>H NMR (400 MHz, CDCl<sub>3</sub>)  $\delta$  5.69 (1H, s), 5.08 (2H, overlapped), 2.18–2.19 (4H, overlapped), 2.18 (3H, s), 2.06 (2H, m), 1.98 (2H, m), 1.67 (3H, s), 1.60 (6H, overlapped) ppm; <sup>13</sup>C NMR (100 MHz, CDCl<sub>3</sub>)  $\delta$  172.3, 163.1, 136.4, 131.6, 124.3, 122.8, 115.4, 41.3, 39.8, 26.8, 26.1, 25.8, 19.3, 17.8, 16.2 ppm.

#### 4 X-Ray Crystallographic analyses of **3** and **4**

The single crystals of **3** and **4** were obtained from CH<sub>3</sub>OH solution by slow evaporation at room temperature. X-ray diffraction data were collected on an Agilent Gemini S Ultra diffractometer using Cu K $\alpha$  radiation ( $\lambda$  = 1.54178 Å). The crystal structures were solved by direct methods and refined by full-matrix least squares on F<sub>2</sub> using the SHELXL-2015 program. The crystallographic data have been deposited with the Cambridge Crystallographic Data Centre (CCDC 2340348 for **3**, CCDC 2340233 for **4**).

Crystal data of **3**. C<sub>32</sub>H<sub>40</sub>O<sub>7</sub> (Formula weight = 536.64); Triclinic, space group *P* $\bar{1}$ ; *a*

= 10.1786(4) Å,  $b = 12.0107(3)$  Å,  $c = 13.3288(4)$  Å,  $\alpha = 103.806(2)^\circ$ ;  $\beta = 108.912(3)^\circ$ ;  $\gamma = 101.165(3)^\circ$ ;  $V = 1430.37(8)$  Å<sup>3</sup>;  $T = 149.95(13)$  K;  $Z = 2$ ;  $\rho_{\text{calc}} = 1.246$  g/cm<sup>3</sup>;  $F(000) = 576.0$ ; A total of 23668 reflections in  $-12 \leq h \leq 12$ ,  $-14 \leq k \leq 14$ ,  $-16 \leq l \leq 16$  were collected in the range  $7.412 \leq \theta \leq 148.308$ , of which 5709 unique reflections with  $I > 2\sigma(I)$  were collected for the analysis. The final  $R$  indices [ $I > 2\sigma(I)$ ]:  $R_1 = 0.0463$ ,  $wR_2 = 0.1291$ ,  $R$  indices (all data):  $R_1 = 0.0505$ ,  $wR_2 = 0.1333$ ; the goodness of fit on  $F^2$  was 1.060.

Crystal data of **4**. C<sub>32</sub>H<sub>38</sub>O<sub>7</sub> (Formula weight = 534.62); Triclinic, space group  $P\bar{1}$ ;  $a = 9.57700(10)$  Å,  $b = 10.91970(10)$  Å,  $c = 14.0119(2)$  Å,  $\alpha = 92.2630(10)^\circ$ ;  $\beta = 97.3280(10)^\circ$ ;  $\gamma = 102.0190(10)^\circ$ ;  $V = 1418.21(3)$  Å<sup>3</sup>;  $T = 100.00(10)$  K;  $Z = 2$ ;  $\rho_{\text{calc}} = 1.252$  g/cm<sup>3</sup>;  $F(000) = 572.0$ ; A total of 50257 reflections in  $-11 \leq h \leq 11$ ,  $-13 \leq k \leq 13$ ,  $-17 \leq l \leq 17$  were collected in the range  $8.298 \leq \theta \leq 147.382$ , of which 5650 unique reflections with  $I > 2\sigma(I)$  were collected for the analysis. The final  $R$  indices [ $I > 2\sigma(I)$ ]:  $R_1 = 0.0370$ ,  $wR_2 = 0.0979$ ,  $R$  indices (all data):  $R_1 = 0.0383$ ,  $wR_2 = 0.0990$ ; the goodness of fit on  $F^2$  was 1.029.

## 5 Antiviral effect assay

### 5.1 Cells, viruses, and antiviral compounds

HEp-2 (a human epithelial type 2 cell line) and Vero (an African green monkey kidney cell line) cells were purchased from the American Type Culture Collection (ATCC, USA) and cultured in Dulbecco's modified Eagle's medium (DMEM) supplemented with 10% fetal bovine serum (FBS, Biological Industries) containing 1% Penicillin-Streptomycin solution. RSV A2 and HSV-1 F strains were propagated in HEp-2 and Vero cells, respectively. Viral suspensions were stored at  $-80^\circ\text{C}$ . Compound samples were dissolved in Dimethyl sulfoxide (DMSO) at 50 mM for subsequent experiments.

### 5.2 Antiviral assay

Vero and HEp-2 cells were seeded in 96-well plates and incubated overnight. The cells were treated with DMSO or diluted compounds, and then inoculated with HSV-1 and RSV, respectively. After incubation for 36 h or 60 h, the cytopathic effect (CPE) induced by the HSV-1 and RSV were determined as previously described.<sup>[1-2]</sup>

### 5.3 Confocal assay

HEp-2 cells were seeded in confocal dishes and inoculated with RSV in the presence of DMSO, ribavirin, or compound **1**. At 48 post-infection, the fusion (F) glycoprotein in the cells was stained with anti-RSV F and Alexa flour 488-conjugated secondary antibodies. The cell nucleus was stained with 4',6-diamidino-2-phenylindole (DAPI). After washing with PBS, the fluorescence intensity in cells was detected with a laser scanning confocal microscopy.

### 5.4 Time of addition assay

Vero or HEp-2 cells were infected with HSV-1/GFP and RSV respectively, and then treated with compound **1** or DMSO at indicated time points after viral infection. At 24 or 48 h post-infection, the cells were fixed with 4% paraformaldehyde in PBS and permeabilized with 0.1% Triton X-100 for 10 min. For RSV infection, the cells were incubated with RSV F specific antibody, followed by incubation with Alexa flour 488-conjugated secondary antibody. All the cells were stained with DAPI. After washing with PBS, the fluorescence in Vero or HEp-2 cells was measured using a fluorescence microscope.

## 6 Chiral separation of **1**–**4**

The racemic mixtures ( $\pm$ )-**1**–( $\pm$ )-**4** were subjected to a chiral HPLC column to afford the optical pure enantiomers (+)-**1**, (–)-**1**, (+)-**2**, (–)-**2**, (+)-**3**, (–)-**3**, (+)-**4**, and (–)-**4**.

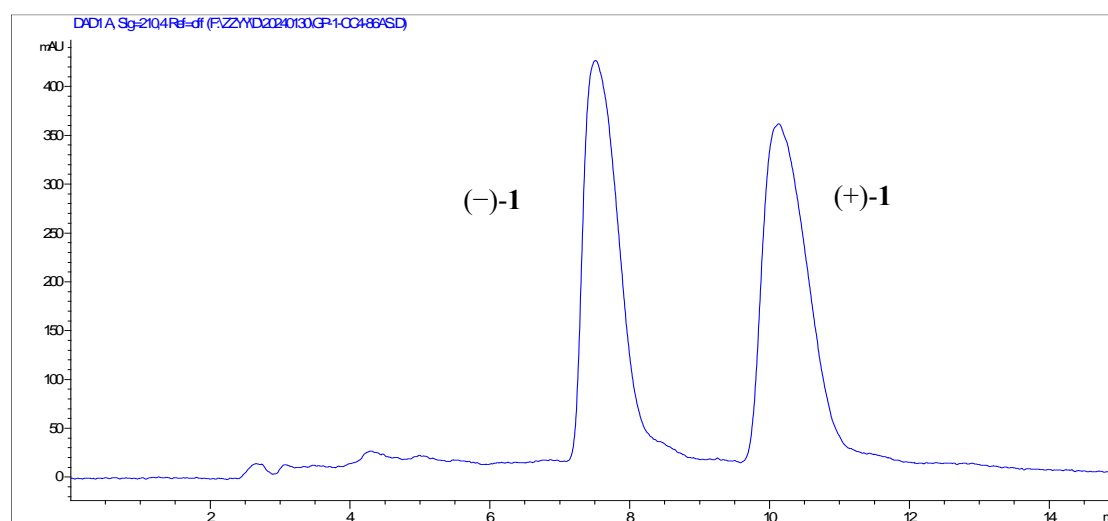

Fig. S1. Chiral HPLC Chromatogram of **1** [column: Industries ChromegaChiral CC4 (4.6 × 250 mm, 5 μm), mobile phase: CH<sub>3</sub>CN/H<sub>2</sub>O/CF<sub>3</sub>COOH (86:14:0.1, V/V/V), flow rate: 1.0 mL/min, detection wavelength: 210 nm].

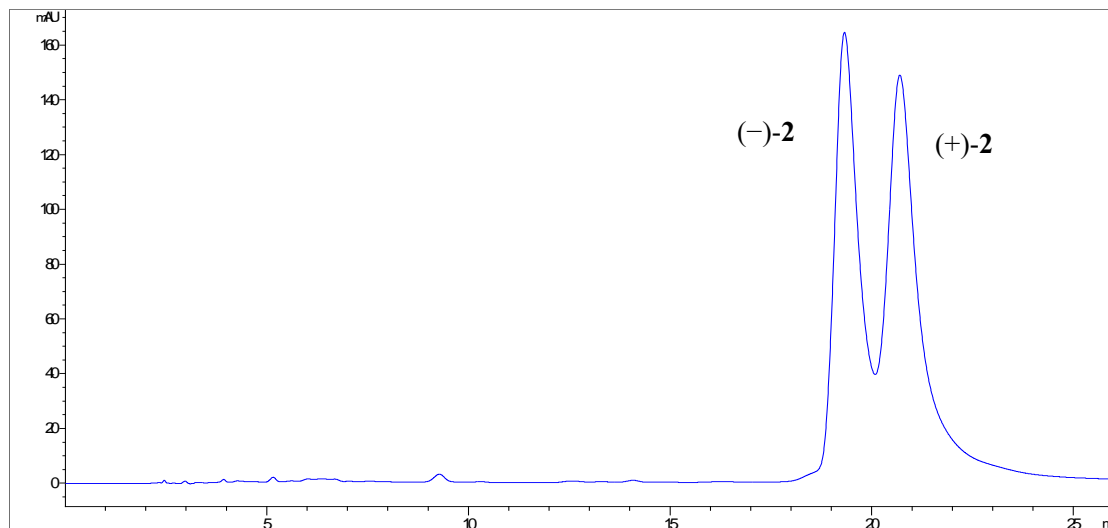

Fig. S2. Chiral HPLC Chromatogram of **2** [column: Phenomenex Cellulose-1 (4.6 × 250 mm, 5 μm), mobile phase: CH<sub>3</sub>CN/H<sub>2</sub>O/CF<sub>3</sub>COOH (70:30:0.1, V/V/V), flow rate: 1.0 mL/min, detection wavelength: 280 nm].

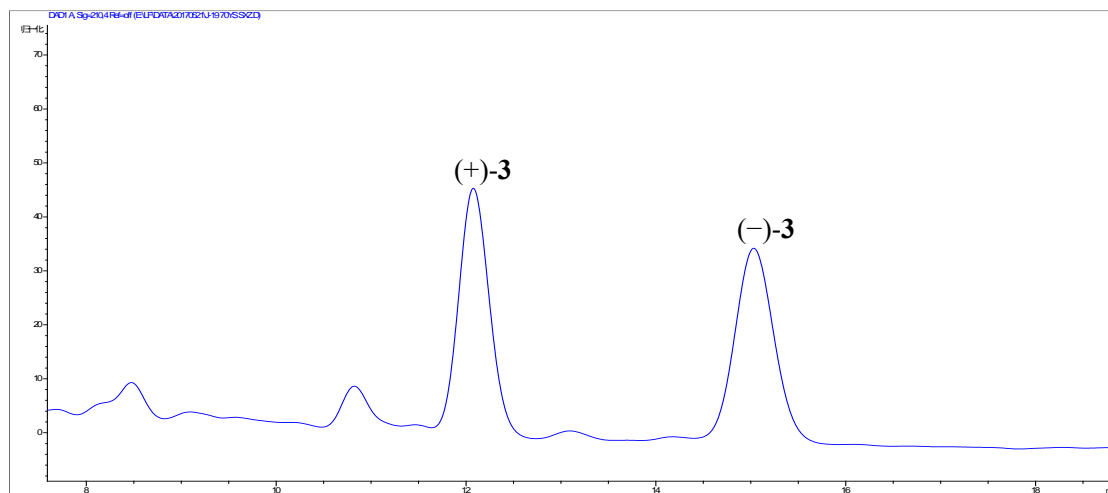

Fig. S3. Chiral HPLC Chromatogram of **3** [column: Phenomenex Cellulose-1 (4.6 × 250 mm, 5 μm), mobile phase: CH<sub>3</sub>CN/H<sub>2</sub>O/CF<sub>3</sub>COOH (70:30:0.1, V/V/V), flow rate: 1.0 mL/min, detection wavelength: 210 nm].



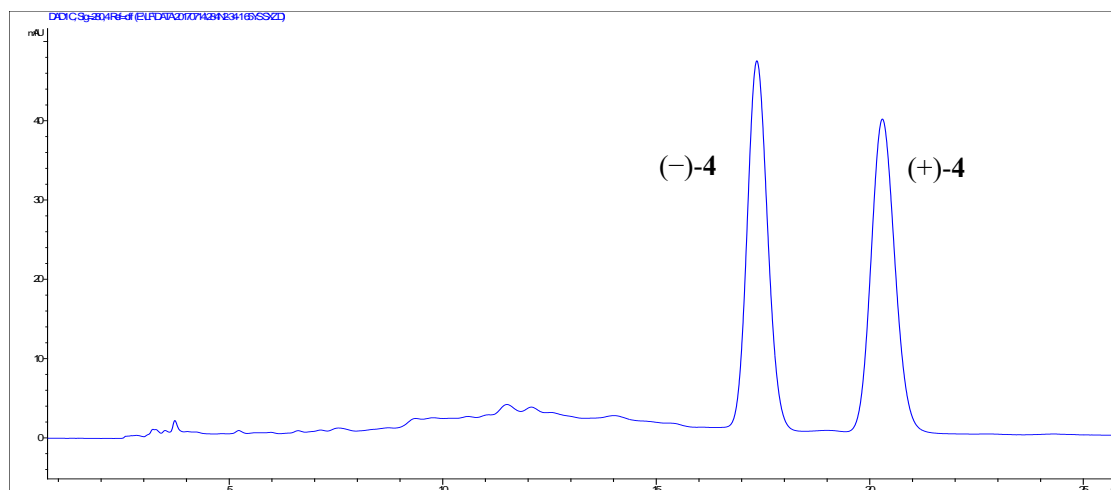

Fig. S4. Chiral HPLC Chromatogram of **4** [column: Phenomenex Cellulose-1 (4.6 × 250 mm, 5 μm), mobile phase: CH<sub>3</sub>CN/H<sub>2</sub>O/CF<sub>3</sub>COOH (65:35:0.1, V/V/V), flow rate: 1.0 mL/min, detection wavelength: 280 nm].

## 7 Quantum chemical ECD calculations of 1–4

### 7.1 ECD calculation for 1

The conformational analysis of compound **1** was performed in the SYBYL 8.1 program by using MMFF94s molecular force field, which afforded 36 conformers of **1**, with an energy cutoff of 10 kcal mol<sup>-1</sup> to the global minima. All the obtained conformers were further optimized using DFT at the B3LYP/6-31+G(d) level in acetonitrile by using Gaussian09 software,<sup>[3]</sup> and 26 conformers of **1** were selected. All of the optimized stable conformers were used for TDDFT computation of the excited states at the same levels, with the consideration of the first 30 excitations. The overall ECD curves of **1** were weighted by Boltzmann distribution of each conformer (with a half-bandwidth of 0.12 eV), with a UV correction of 3 nm. The calculated ECD spectra of **1** were subsequently compared with the experimental one. The ECD spectra were produced by SpecDis 1.71 software.<sup>[4]</sup>

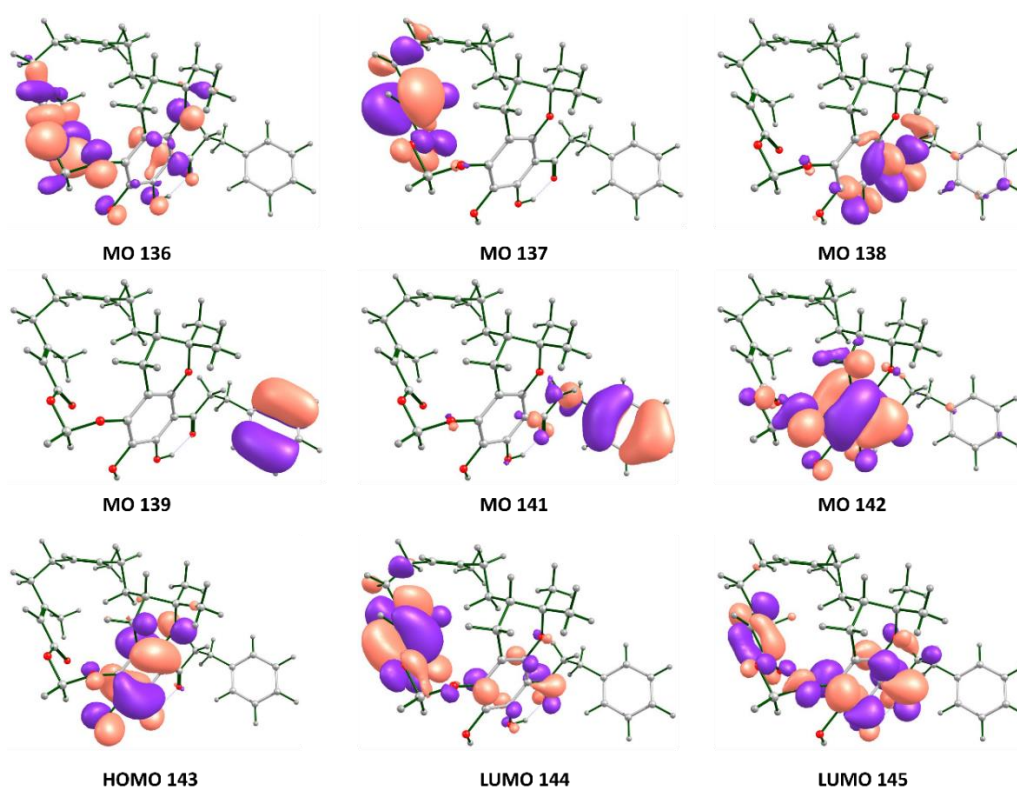

**Fig. S8.** Key molecular orbitals involved in important transitions regarding the ECD spectra of conformer 6 in acetonitrile at the B3LYP/6-31+G(d) level.

**Table S11.** Key transitions and their related rotatory and oscillator strengths of conformer 6 of **1** at the B3LYP/6-31+G(d) level in acetonitrile

| <b>HOMO is 143</b> |                                 |                        |                  |                      |                                                                                     |
|--------------------|---------------------------------|------------------------|------------------|----------------------|-------------------------------------------------------------------------------------|
| <b>No.</b>         | <b>Energy (cm<sup>-1</sup>)</b> | <b>Wavelength (nm)</b> | <b>R(length)</b> | <b>Osc. Strength</b> | <b>Major contribs</b>                                                               |
| 1                  | 26375.1<br>3638                 | 379.1449589            | -10.253          | 0.0209               | HOMO->LUMO (96%)                                                                    |
| 2                  | 27221.2<br>1198                 | 367.3605719            | 17.1003          | 0.038                | HOMO->L+1 (95%)                                                                     |
| 3                  | 33345.3<br>7976                 | 299.8916213            | -10.5545         | 0.0316               | H-1->LUMO (94%)                                                                     |
| 4                  | 34059.1<br>8043                 | 293.6065952            | 13.0796          | 0.0054               | H-5->L+1 (33%), H-2->LUMO (15%), H-2->L+1 (37%)                                     |
| 5                  | 34779.4<br>3353                 | 287.5262471            | 0.721            | 0.0024               | H-3->LUMO (89%)                                                                     |
| 6                  | 35659.3<br>8441                 | 280.4310889            | -58.3272         | 0.2482               | H-1->L+1 (78%)                                                                      |
| 7                  | 36201.3<br>8899                 | 276.2324949            | 12.6078          | 0.0397               | H-5->L+1 (31%), H-2->LUMO (23%), H-2->L+1 (24%)                                     |
| 8                  | 36628.8<br>6284                 | 273.0087484            | -19.825          | 0.0099               | HOMO->L+2 (76%)                                                                     |
| 9                  | 37286.2<br>047                  | 268.1957062            | 0.7312           | 0.0009               | H-8->LUMO (16%), H-7->LUMO (61%)                                                    |
| 10                 | 37357.9<br>8804                 | 267.6803684            | -1.3307          | 0.0009               | H-2->LUMO (59%), H-2->L+1 (35%)                                                     |
| 11                 | 37842.7<br>2725                 | 264.2515676            | -0.43            | 0.0009               | H-4->LUMO (36%), H-4->L+1 (58%)                                                     |
| 12                 | 38205.6<br>7675                 | 261.7412084            | 3.0641           | 0.0057               | HOMO->L+3 (82%)                                                                     |
| 13                 | 38240.3<br>5859                 | 261.503824             | -1.5511          | 0.0007               | H-3->L+1 (90%)                                                                      |
| 14                 | 38558.9<br>4759                 | 259.3431778            | -6.0822          | 0.0032               | HOMO->L+2 (15%), HOMO->L+5 (11%), HOMO->L+6 (15%), HOMO->L+7 (19%), HOMO->L+8 (22%) |
| 15                 | 39009.0<br>0496                 | 256.3510659            | -0.1235          | 0.0009               | HOMO->L+4 (90%)                                                                     |
| 16                 | 39491.3<br>2451                 | 253.2201724            | -2.815           | 0.0026               | HOMO->L+5 (88%)                                                                     |
| 17                 | 39635.6<br>9775                 | 252.2978166            | 0.0168           | 0.0001               | H-4->LUMO (62%), H-4->L+1 (38%)                                                     |
| 18                 | 40004.2<br>9312                 | 249.9731709            | 0.1495           | 0.0001               | HOMO->L+6 (64%), HOMO->L+7 (21%), HOMO->L+8 (10%)                                   |
| 19                 | 40685.0<br>2506                 | 245.7906806            | 3.1524           | 0.0159               | HOMO->L+7 (47%), HOMO->L+8 (39%)                                                    |
| 20                 | 42321.5<br>24                   | 236.286387             | -2.0684          | 0.0799               | HOMO->L+9 (15%), HOMO->L+10 (55%)                                                   |

|    |                 |             |          |        |                                                                   |
|----|-----------------|-------------|----------|--------|-------------------------------------------------------------------|
| 21 | 42433.6<br>3506 | 235.6621106 | 1.2853   | 0.0014 | H-4->L+5 (23%), H-2->L+3 (14%), H-2->L+4 (41%)                    |
| 22 | 42632.8<br>5401 | 234.5608858 | 2.1533   | 0.0016 | HOMO->L+9 (59%), HOMO->L+10 (13%), HOMO->L+12 (12%)               |
| 23 | 42847.3<br>9749 | 233.3864035 | 1.7377   | 0.0008 | H-5->LUMO (78%), H-5->L+1 (21%)                                   |
| 24 | 43347.4<br>6123 | 230.694018  | -3.5062  | 0.0035 | HOMO->L+9 (14%), HOMO->L+12 (53%)                                 |
| 25 | 43569.2<br>637  | 229.5196005 | 35.5641  | 0.0347 | H-8->LUMO (10%), H-6->LUMO (16%), H-1->L+2 (20%)                  |
| 26 | 43611.2<br>0453 | 229.2988719 | 51.176   | 0.0205 | H-6->LUMO (14%), H-1->L+2 (54%)                                   |
| 27 | 43762.8<br>3676 | 228.5043827 | -11.1155 | 0.0594 | H-7->L+1 (12%), H-6->LUMO (23%), H-6->L+1 (18%), HOMO->L+11 (21%) |
| 28 | 44224.1<br>859  | 226.1206125 | 68.296   | 0.0627 | H-7->LUMO (14%), H-6->L+1 (28%), HOMO->L+11 (22%)                 |
| 29 | 44572.6<br>1741 | 224.3529903 | 6.5988   | 0.0021 | HOMO->L+13 (65%), HOMO->L+15 (14%)                                |
| 30 | 44819.4<br>2307 | 223.117553  | 0.3874   | 0.0053 | H-8->LUMO (34%), H-7->L+1 (56%)                                   |

**Table S12.** Cartesian coordinates of conformer 6 of **1**

| Standard orientation: |               |             |                         |           |           |
|-----------------------|---------------|-------------|-------------------------|-----------|-----------|
| Center Number         | Atomic Number | Atomic Type | Coordinates (Angstroms) |           |           |
|                       |               |             | X                       | Y         | Z         |
| 1                     | 6             | 0           | -2.010541               | 2.962915  | -1.239329 |
| 2                     | 8             | 0           | -0.914152               | 2.412593  | -1.990579 |
| 3                     | 8             | 0           | -3.109797               | 2.040766  | -1.220526 |
| 4                     | 6             | 0           | -5.895511               | 0.832361  | 0.600509  |
| 5                     | 6             | 0           | -5.095624               | 1.261022  | -0.39641  |
| 6                     | 6             | 0           | -4.060576               | 2.315874  | -0.294148 |
| 7                     | 6             | 0           | -5.332251               | -2.166384 | 0.111335  |
| 8                     | 6             | 0           | -6.559871               | -1.645512 | 0.809339  |
| 9                     | 6             | 0           | -6.94169                | -0.236881 | 0.319706  |
| 10                    | 6             | 0           | 0.003801                | 1.810772  | -1.168036 |
| 11                    | 6             | 0           | 0.117729                | 0.409251  | -1.172929 |
| 12                    | 6             | 0           | -0.736451               | -0.42194  | -2.092235 |
| 13                    | 6             | 0           | -0.967217               | -1.81993  | -1.501793 |
| 14                    | 6             | 0           | -1.978322               | -1.701643 | -0.326463 |
| 15                    | 6             | 0           | -2.981775               | -2.862794 | -0.253728 |
| 16                    | 6             | 0           | -4.144381               | -2.500535 | 0.653742  |
| 17                    | 6             | 0           | 0.843632                | 2.573682  | -0.362253 |
| 18                    | 6             | 0           | 1.772601                | 1.955717  | 0.465579  |
| 19                    | 6             | 0           | 1.905224                | 0.559634  | 0.48826   |
| 20                    | 6             | 0           | 1.054861                | -0.215159 | -0.321588 |
| 21                    | 8             | 0           | 1.123492                | -1.575406 | -0.183485 |
| 22                    | 6             | 0           | 0.411203                | -2.415067 | -1.109338 |
| 23                    | 6             | 0           | -3.836151               | -2.503955 | 2.125846  |
| 24                    | 6             | 0           | -5.855641               | 1.325738  | 2.021522  |
| 25                    | 8             | 0           | -4.073186               | 3.262326  | 0.472823  |
| 26                    | 6             | 0           | 0.258992                | -3.770784 | -0.40077  |
| 27                    | 6             | 0           | 1.318935                | -2.644067 | -2.335233 |
| 28                    | 8             | 0           | 0.773386                | 3.940959  | -0.354988 |
| 29                    | 8             | 0           | 2.528314                | 2.793624  | 1.256557  |
| 30                    | 6             | 0           | 2.95894                 | 0.000206  | 1.385453  |
| 31                    | 8             | 0           | 3.347397                | 0.734659  | 2.300737  |
| 32                    | 6             | 0           | 3.539385                | -1.38143  | 1.145056  |
| 33                    | 6             | 0           | 4.963763                | -1.523754 | 1.688043  |
| 34                    | 6             | 0           | 5.980721                | -0.78921  | 0.84626   |
| 35                    | 6             | 0           | 6.442106                | -1.344727 | -0.355496 |
| 36                    | 6             | 0           | 7.367039                | -0.657925 | -1.14385  |
| 37                    | 6             | 0           | 7.837811                | 0.590288  | -0.740283 |
| 38                    | 6             | 0           | 7.384459                | 1.152589  | 0.451662  |
| 39                    | 6             | 0           | 6.46027                 | 0.466628  | 1.241452  |
| 40                    | 1             | 0           | -1.722789               | 3.249324  | -0.21971  |
| 41                    | 1             | 0           | -2.33502                | 3.863646  | -1.771671 |
| 42                    | 1             | 0           | -5.175589               | 0.812808  | -1.383214 |
| 43                    | 1             | 0           | -5.431477               | -2.214842 | -0.9733   |
| 44                    | 1             | 0           | -6.453168               | -1.63951  | 1.89671   |
| 45                    | 1             | 0           | -7.389171               | -2.32868  | 0.588561  |

|    |   |   |           |           |           |
|----|---|---|-----------|-----------|-----------|
| 46 | 1 | 0 | -7.885934 | 0.062209  | 0.792897  |
| 47 | 1 | 0 | -7.157969 | -0.279121 | -0.756673 |
| 48 | 1 | 0 | -1.703714 | 0.052861  | -2.287988 |
| 49 | 1 | 0 | -0.235317 | -0.489528 | -3.064969 |
| 50 | 1 | 0 | -1.418102 | -2.439046 | -2.288396 |
| 51 | 1 | 0 | -1.452032 | -1.603889 | 0.630665  |
| 52 | 1 | 0 | -2.557897 | -0.7762   | -0.440531 |
| 53 | 1 | 0 | -2.505871 | -3.779594 | 0.108286  |
| 54 | 1 | 0 | -3.351097 | -3.090142 | -1.261673 |
| 55 | 1 | 0 | -3.180804 | -1.665504 | 2.381257  |
| 56 | 1 | 0 | -4.726401 | -2.437198 | 2.754561  |
| 57 | 1 | 0 | -3.328834 | -3.434786 | 2.40157   |
| 58 | 1 | 0 | -4.975556 | 1.930453  | 2.248469  |
| 59 | 1 | 0 | -6.746953 | 1.923919  | 2.235945  |
| 60 | 1 | 0 | -5.833628 | 0.482619  | 2.71948   |
| 61 | 1 | 0 | -0.217668 | -3.661219 | 0.578799  |
| 62 | 1 | 0 | -0.317374 | -4.479384 | -1.004098 |
| 63 | 1 | 0 | 1.24026   | -4.215783 | -0.195171 |
| 64 | 1 | 0 | 1.614047  | -1.706018 | -2.815364 |
| 65 | 1 | 0 | 0.830074  | -3.279456 | -3.080895 |
| 66 | 1 | 0 | 2.258819  | -3.124199 | -2.036914 |
| 67 | 1 | 0 | 1.465699  | 4.212562  | 0.283959  |
| 68 | 1 | 0 | 3.023586  | 2.206441  | 1.885878  |
| 69 | 1 | 0 | 3.541927  | -1.605305 | 0.073513  |
| 70 | 1 | 0 | 2.892411  | -2.100133 | 1.660492  |
| 71 | 1 | 0 | 5.236162  | -2.586976 | 1.705551  |
| 72 | 1 | 0 | 5.023216  | -1.184942 | 2.729747  |
| 73 | 1 | 0 | 6.082704  | -2.316933 | -0.684548 |
| 74 | 1 | 0 | 7.719661  | -1.096625 | -2.073327 |
| 75 | 1 | 0 | 8.557048  | 1.12497   | -1.354525 |
| 76 | 1 | 0 | 7.749023  | 2.126589  | 0.766494  |
| 77 | 1 | 0 | 6.111289  | 0.92056   | 2.166543  |

## 7.2 ECD calculation for **2**

The conformational analysis of compound **2** was performed in the SYBYL 8.1 program by using MMFF94s molecular force field, which afforded 48 conformers of **2**, with an energy cutoff of 10 kcal mol<sup>-1</sup> to the global minima. All the obtained conformers were further optimized using DFT at the CAM-B3LYP/6-31+G(d) level in acetonitrile by using Gaussian09 software,<sup>[3]</sup> and 22 conformers of **2** were selected. All of the optimized stable conformers were used for TDDFT computation of the excited states at the same levels, with the consideration of the first 30 excitations. The overall ECD curves of **2** were weighted by Boltzmann distribution of each conformer (with a half-bandwidth of 0.15 eV), with a UV correction of 6 nm. The calculated ECD spectra of

2 were subsequently compared with the experimental one. The ECD spectra were produced by SpecDis 1.71 software.<sup>[4]</sup>

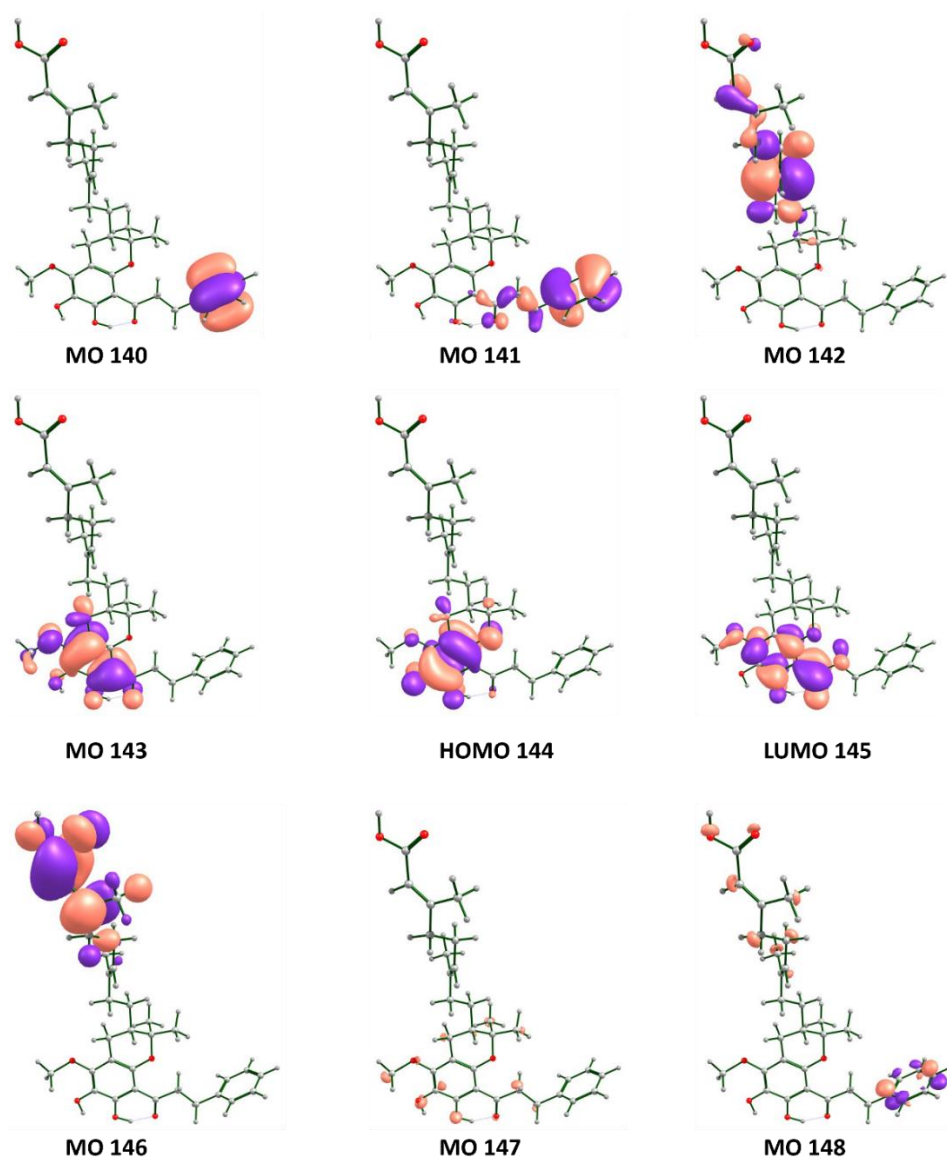

**Fig. S9.** Key molecular orbitals involved in important transitions regarding the ECD spectra of conformer 4 in acetonitrile at the CAM-B3LYP/6-31+G(d) level.

**Table S13.** Key transitions and their related rotatory and oscillator strengths of conformer 4 of **2** at the CAM-B3LYP/6-31+G(d) level in acetonitrile

| <b>HOMO is 144</b> |                                 |                        |                   |                      |                                                                     |
|--------------------|---------------------------------|------------------------|-------------------|----------------------|---------------------------------------------------------------------|
| <b>No.</b>         | <b>Energy (cm<sup>-1</sup>)</b> | <b>Wavelength (nm)</b> | <b>R (length)</b> | <b>Osc. Strength</b> | <b>Major contribs</b>                                               |
| 1                  | 31102.35189                     | 321.519094             | 4.0093            | 0.127                | HOMO->LUMO (95%)                                                    |
| 2                  | 36787.75406                     | 271.8295872            | 5.3204            | 0.0004               | H-6->LUMO (70%), H-3->LUMO (14%)                                    |
| 3                  | 37421.70584                     | 267.22459              | -16.6878          | 0.4747               | H-1->LUMO (92%)                                                     |
| 4                  | 41159.27907                     | 242.9585801            | 0.064             | 0.0001               | HOMO->L+2 (59%), HOMO->L+6 (18%)                                    |
| 5                  | 42164.24588                     | 237.167766             | 37.2435           | 0.0322               | H-8->L+1 (79%)                                                      |
| 6                  | 43979.7999                      | 227.3771145            | -0.055            | 0.0019               | H-4->L+4 (28%), H-3->L+5 (49%)                                      |
| 7                  | 45741.31478                     | 218.6207381            | -108.0944         | 0.5982               | H-8->L+1 (11%), H-5->L+1 (39%), H-2->L+1 (45%)                      |
| 8                  | 46855.16644                     | 213.4236363            | -45.304           | 0.2497               | HOMO->L+14 (11%), HOMO->L+16 (44%)                                  |
| 9                  | 47539.1246                      | 210.3530531            | -1.7921           | 0.0386               | H-1->L+2 (46%), H-1->L+6 (11%), HOMO->L+16 (10%)                    |
| 10                 | 48389.23297                     | 206.6575431            | -7.6506           | 0.0069               | H-1->L+2 (11%), HOMO->L+8 (10%), HOMO->L+11 (12%)                   |
| 11                 | 48870.74596                     | 204.6213906            | 45.734            | 0.0163               | H-7->LUMO (24%), H-3->LUMO (44%)                                    |
| 12                 | 48960.2735                      | 204.247225             | -12.6997          | 0.03                 | H-4->L+5 (25%), H-3->LUMO (12%), H-3->L+4 (35%)                     |
| 13                 | 49220.79058                     | 203.16618              | -37.0296          | 0.0467               | H-7->LUMO (17%), H-3->LUMO (17%)                                    |
| 14                 | 49319.19022                     | 202.7608311            | -13.1262          | 0.1291               | H-5->L+1 (44%), H-2->L+1 (34%)                                      |
| 15                 | 49827.31951                     | 200.6931157            | -6.5847           | 0.0759               | H-7->LUMO (17%), HOMO->L+9 (22%)                                    |
| 16                 | 50073.31862                     | 199.707155             | -11.8478          | 0.0467               | HOMO->L+3 (13%), HOMO->L+6 (19%), HOMO->L+7 (10%), HOMO->L+10 (12%) |
| 17                 | 50241.88849                     | 199.0371043            | -0.7699           | 0.0012               | HOMO->L+1 (96%)                                                     |
| 18                 | 50704.04418                     | 197.2229269            | -45.4341          | 0.0365               | H-2->L+2 (15%), H-2->L+3 (31%), H-2->L+7 (13%)                      |
| 19                 | 50825.02734                     | 196.7534603            | 40.66             | 0.128                | H-1->L+16 (24%), HOMO->L+8 (12%), HOMO->L+29 (13%)                  |
| 20                 | 51648.51942                     | 193.6163924            | -8.6092           | 0.0136               | H-2->LUMO (74%)                                                     |



|    |                 |             |          |        |                                                     |
|----|-----------------|-------------|----------|--------|-----------------------------------------------------|
| 21 | 52368.772<br>52 | 190.9534923 | -22.4948 | 0.0731 | H-4->LUMO (71%)                                     |
| 22 | 52640.581<br>36 | 189.9675068 | -3.1347  | 0.0048 | H-4->LUMO (19%), H-3->L+2 (23%), H-3->L+6 (30%)     |
| 23 | 52818.829<br>89 | 189.3264205 | -1.3898  | 0.0007 | HOMO->L+3 (15%), HOMO->L+4 (34%), HOMO->L+6 (11%)   |
| 24 | 53301.149<br>44 | 187.6132148 | 165.0636 | 0.2956 | H-2->L+6 (14%), H-2->L+8 (29%), H-2->L+9 (19%)      |
| 25 | 53574.571<br>39 | 186.6557163 | 2.2318   | 0.0156 | HOMO->L+2 (15%), HOMO->L+4 (34%), HOMO->L+7 (12%)   |
| 26 | 53708.459<br>43 | 186.1904085 | -65.5898 | 0.0987 | H-1->L+16 (10%), HOMO->L+5 (39%)                    |
| 27 | 53861.704<br>77 | 185.6606664 | 9.3274   | 0.02   | H-1->L+3 (14%), H-1->L+7 (15%)                      |
| 28 | 54231.913<br>25 | 184.3932733 | 13.2047  | 0.0129 | HOMO->L+3 (11%), HOMO->L+10 (11%), HOMO->L+17 (25%) |
| 29 | 54275.467<br>19 | 184.2453049 | 10.6885  | 0.0216 | H-4->L+2 (23%), H-4->L+3 (11%), H-4->L+6 (37%)      |
| 30 | 54625.511<br>81 | 183.0646463 | 160.2453 | 0.4609 | H-4->L+4 (40%), H-3->L+5 (30%)                      |
| 31 | 54656.967<br>44 | 182.9592908 | 0.3736   | 0.0108 | H-1->L+8 (23%)                                      |
| 32 | 54823.924<br>2  | 182.40212   | -78.7536 | 0.0251 | H-2->L+8 (16%), H-2->L+11 (16%), H-2->L+15 (10%)    |
| 33 | 54877.156<br>79 | 182.2251841 | -19.417  | 0.0317 | HOMO->L+8 (10%)                                     |
| 34 | 55203.004<br>78 | 181.1495595 | -60.6351 | 0.0594 | HOMO->L+5 (16%), HOMO->L+29 (14%)                   |
| 35 | 55411.902<br>38 | 180.4666429 | -46.8327 | 0.878  | H-4->L+5 (50%), H-3->L+4 (18%)                      |
| 36 | 55558.695<br>29 | 179.9898278 | 17.1017  | 0.021  | H-9->LUMO (60%)                                     |
| 37 | 55774.045<br>32 | 179.2948663 | -13.7356 | 0.0238 | HOMO->L+12 (16%)                                    |
| 38 | 55858.733<br>53 | 179.0230348 | 10.3084  | 0.0123 | H-1->L+1 (61%)                                      |
| 39 | 55878.090<br>84 | 178.9610176 | 3.7799   | 0.0016 | H-1->L+1 (33%)                                      |
| 40 | 55924.871       | 178.8113199 | 28.6765  | 0.0964 | HOMO->L+29 (10%)                                    |
| 41 | 56239.427<br>23 | 177.8111992 | -4.5521  | 0.0125 | H-5->L+3 (22%), H-2->L+7 (13%)                      |
| 42 | 56930.644<br>37 | 175.6523242 | 23.3091  | 0.0647 |                                                     |
| 43 | 56975.811<br>42 | 175.5130774 | -5.2603  | 0.0177 | H-6->L+2 (13%), H-3->L+2 (12%), H-3->L+10 (22%)     |

|    |                 |             |          |        |                                                  |
|----|-----------------|-------------|----------|--------|--------------------------------------------------|
| 44 | 57780.752<br>74 | 173.0680119 | 10.0792  | 0.155  | H-2->L+20 (11%)                                  |
| 45 | 57948.516<br>06 | 172.5669729 | 42.7462  | 0.069  | HOMO->L+3 (16%)                                  |
| 46 | 58075.145<br>11 | 172.1907019 | 5.6957   | 0.0051 | H-1->L+4 (19%)                                   |
| 47 | 58270.331<br>28 | 171.6139205 | 0.0093   | 0.0058 | H-1->L+4 (32%)                                   |
| 48 | 58480.035<br>43 | 170.9985284 | -2.0121  | 0.0048 | H-3->L+9 (15%), H-3->L+12 (28%), H-3->L+14 (16%) |
| 49 | 58579.241<br>62 | 170.7089358 | 55.5155  | 0.0332 | H-3->L+10 (14%)                                  |
| 50 | 58709.903<br>44 | 170.3290146 | -40.0414 | 0.0465 | H-2->L+2 (11%)                                   |

**Table S14.** Cartesian coordinates of conformer 4 of 2

| Standard orientation: |               |             |                         |           |           |
|-----------------------|---------------|-------------|-------------------------|-----------|-----------|
| Center Number         | Atomic Number | Atomic Type | Coordinates (Angstroms) |           |           |
|                       |               |             | X                       | Y         | Z         |
| 1                     | 6             | 0           | 2.089235                | 3.546557  | 0.019251  |
| 2                     | 6             | 0           | 3.418503                | 3.889621  | -0.211228 |
| 3                     | 6             | 0           | 4.389004                | 2.897304  | -0.367129 |
| 4                     | 6             | 0           | 4.076072                | 1.53253   | -0.28543  |
| 5                     | 6             | 0           | 2.737658                | 1.177692  | -0.051772 |
| 6                     | 6             | 0           | 1.745161                | 2.172668  | 0.076043  |
| 7                     | 6             | 0           | 5.211204                | 0.565004  | -0.444665 |
| 8                     | 6             | 0           | 5.017708                | -0.925378 | -0.253781 |
| 9                     | 8             | 0           | 6.31398                 | 1.048896  | -0.726773 |
| 10                    | 8             | 0           | 1.035223                | 4.40405   | 0.199444  |
| 11                    | 8             | 0           | 5.669151                | 3.362296  | -0.601576 |
| 12                    | 6             | 0           | 6.340106                | -1.687895 | -0.3563   |
| 13                    | 6             | 0           | 6.218393                | -3.717588 | 1.142735  |
| 14                    | 6             | 0           | 6.137429                | -3.167191 | -0.143555 |
| 15                    | 6             | 0           | 5.830965                | -4.004826 | -1.224507 |
| 16                    | 6             | 0           | 5.619586                | -5.369893 | -1.023189 |
| 17                    | 6             | 0           | 5.708181                | -5.908629 | 0.259324  |
| 18                    | 6             | 0           | 6.006736                | -5.082934 | 1.341928  |
| 19                    | 6             | 0           | 0.302165                | 1.786014  | 0.301892  |
| 20                    | 8             | 0           | 2.43287                 | -0.150886 | 0.01152   |
| 21                    | 6             | 0           | 1.182364                | -0.552295 | 0.603974  |
| 22                    | 6             | 0           | 0.027729                | 0.302438  | 0.02663   |
| 23                    | 6             | 0           | 1.032988                | -2.029156 | 0.194657  |
| 24                    | 6             | 0           | 1.319552                | -0.49781  | 2.135432  |
| 25                    | 8             | 0           | 3.861896                | 5.182208  | -0.305416 |
| 26                    | 6             | 0           | -9.344334               | -0.220497 | -0.020719 |
| 27                    | 6             | 0           | -8.48505                | -0.820916 | -0.867402 |
| 28                    | 6             | 0           | -7.101166               | -0.232241 | -1.077905 |
| 29                    | 6             | 0           | -5.993575               | -1.121993 | -0.503166 |
| 30                    | 6             | 0           | -4.637388               | -0.500665 | -0.698444 |
| 31                    | 6             | 0           | -3.881681               | 0.124814  | 0.225906  |
| 32                    | 6             | 0           | -2.515036               | 0.669636  | -0.145486 |
| 33                    | 6             | 0           | -4.312063               | 0.375465  | 1.646381  |
| 34                    | 6             | 0           | -10.699336              | -0.693026 | 0.319741  |
| 35                    | 6             | 0           | -8.786582               | -2.05216  | -1.679821 |
| 36                    | 8             | 0           | -11.225465              | -1.753142 | 0.045892  |
| 37                    | 8             | 0           | -11.331557              | 0.253162  | 1.039247  |
| 38                    | 6             | 0           | -1.375448               | -0.111481 | 0.526363  |
| 39                    | 6             | 0           | 1.283603                | 5.801855  | 0.212604  |
| 40                    | 1             | 0           | 0.046926                | 0.175071  | -1.0666   |
| 41                    | 1             | 0           | 4.584642                | -1.09903  | 0.737682  |
| 42                    | 1             | 0           | 4.334247                | -1.291261 | -1.027967 |
| 43                    | 1             | 0           | 6.239545                | 2.55619   | -0.718729 |
| 44                    | 1             | 0           | 6.804191                | -1.519933 | -1.336886 |
| 45                    | 1             | 0           | 7.059481                | -1.306826 | 0.380213  |

|    |   |   |            |           |           |
|----|---|---|------------|-----------|-----------|
| 46 | 1 | 0 | 6.446316   | -3.085114 | 1.997451  |
| 47 | 1 | 0 | 5.754321   | -3.597817 | -2.230018 |
| 48 | 1 | 0 | 5.384555   | -6.012682 | -1.867184 |
| 49 | 1 | 0 | 5.543396   | -6.9712   | 0.415196  |
| 50 | 1 | 0 | 6.073734   | -5.502038 | 2.342228  |
| 51 | 1 | 0 | 0.033256   | 2.039505  | 1.334994  |
| 52 | 1 | 0 | -0.331318  | 2.383732  | -0.364712 |
| 53 | 1 | 0 | 0.184439   | -2.516058 | 0.68389   |
| 54 | 1 | 0 | 1.936983   | -2.595692 | 0.450266  |
| 55 | 1 | 0 | 0.912137   | -2.122152 | -0.890783 |
| 56 | 1 | 0 | 2.196893   | -1.069429 | 2.461525  |
| 57 | 1 | 0 | 1.474832   | 0.521871  | 2.501086  |
| 58 | 1 | 0 | 0.4403     | -0.911042 | 2.63894   |
| 59 | 1 | 0 | 4.824942   | 5.092828  | -0.473816 |
| 60 | 1 | 0 | -9.046029  | 0.685057  | 0.500999  |
| 61 | 1 | 0 | -7.037695  | 0.763073  | -0.617603 |
| 62 | 1 | 0 | -6.940745  | -0.072823 | -2.152324 |
| 63 | 1 | 0 | -5.989963  | -2.095833 | -1.00883  |
| 64 | 1 | 0 | -6.188542  | -1.338784 | 0.552575  |
| 65 | 1 | 0 | -4.240929  | -0.605852 | -1.708211 |
| 66 | 1 | 0 | -2.375625  | 0.639643  | -1.233653 |
| 67 | 1 | 0 | -2.475795  | 1.728003  | 0.137898  |
| 68 | 1 | 0 | -5.381884  | 0.217455  | 1.804398  |
| 69 | 1 | 0 | -3.766974  | -0.280736 | 2.331779  |
| 70 | 1 | 0 | -4.107174  | 1.414461  | 1.926348  |
| 71 | 1 | 0 | -8.386464  | -2.942192 | -1.184603 |
| 72 | 1 | 0 | -9.854247  | -2.198654 | -1.856589 |
| 73 | 1 | 0 | -8.32628   | -1.976432 | -2.671278 |
| 74 | 1 | 0 | -12.213687 | -0.127316 | 1.231223  |
| 75 | 1 | 0 | -1.533368  | -1.178075 | 0.331412  |
| 76 | 1 | 0 | -1.435349  | 0.024545  | 1.612608  |
| 77 | 1 | 0 | 1.963792   | 6.079084  | 1.024036  |
| 78 | 1 | 0 | 1.638474   | 6.150607  | -0.762074 |
| 79 | 1 | 0 | 0.329802   | 6.303037  | 0.406222  |

### 7.3 ECD calculation for **3**

The conformational analysis of compound **3** was performed in the SYBYL 8.1 program by using MMFF94s molecular force field, which afforded 25 conformers of **3**, with an energy cutoff of 10 kcal mol<sup>-1</sup> to the global minima. All the obtained conformers were further optimized using DFT at the CAM-B3LYP/6-31+G(d) level in acetonitrile by using Gaussian09 software,<sup>[3]</sup> and 12 conformers of **3** were selected. All of the optimized stable conformers were used for TDDFT computation of the excited states at the same levels, with the consideration of the first 30 excitations. The overall ECD curves of **3** were weighted by Boltzmann distribution of each conformer (with a half-bandwidth of 0.10 eV), with a UV correction of 5 nm. The calculated ECD spectra of **3** were subsequently compared with the experimental one. The ECD spectra were produced by SpecDis 1.71 software.<sup>[4]</sup>

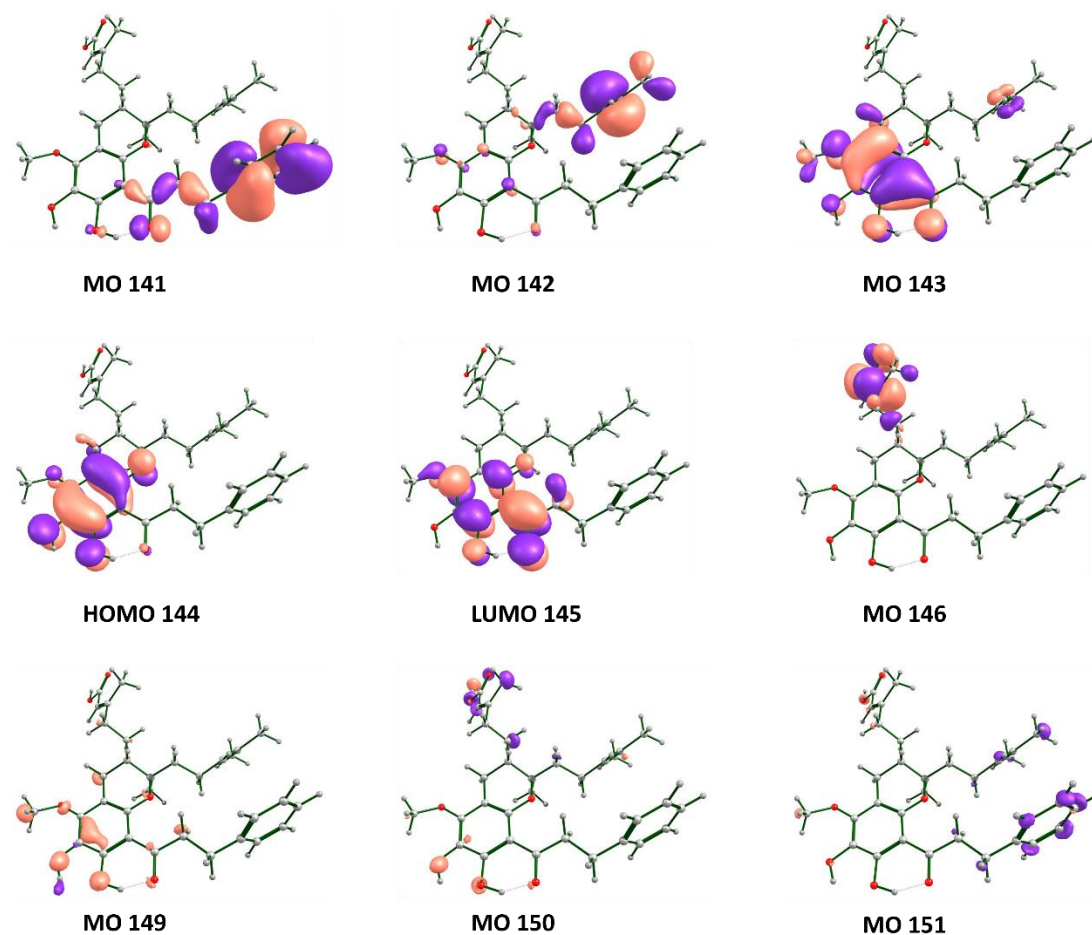

**Fig. S10.** Key molecular orbitals involved in important transitions regarding the ECD spectra of conformer **3** in acetonitrile at the CAM-B3LYP/6-31+G(d) level.

**Table S15.** Key transitions and their related rotatory and oscillator strengths of conformer 3 of **3** at the CAM-B3LYP/6-31+G(d) level in acetonitrile.

| <b>HOMO is 144</b> |                                 |                        |                  |                      |                                                                     |
|--------------------|---------------------------------|------------------------|------------------|----------------------|---------------------------------------------------------------------|
| <b>No.</b>         | <b>Energy (cm<sup>-1</sup>)</b> | <b>Wavelength (nm)</b> | <b>R(length)</b> | <b>Osc. Strength</b> | <b>Major contribs</b>                                               |
| 1                  | 26838.0<br>9863                 | 372.6046372            | 10.3484          | 0.0875               | HOMO->LUMO (97%)                                                    |
| 2                  | 30636.1<br>6343                 | 326.4116286            | -0.0339          | 0.0004               | HOMO->L+1 (100%)                                                    |
| 3                  | 33809.9<br>5511                 | 295.7708748            | 11.358           | 0.0083               | H-6->LUMO (41%), H-3->LUMO (54%)                                    |
| 4                  | 34098.7<br>0159                 | 293.2662985            | -9.7133          | 0.2027               | H-2->LUMO (34%), H-1->LUMO (64%)                                    |
| 5                  | 34389.0<br>6119                 | 290.7901424            | -19.6515         | 0.2279               | H-2->LUMO (64%), H-1->LUMO (31%)                                    |
| 6                  | 36089.2<br>7793                 | 277.090609             | 0.072            | 0.0014               | H-1->L+1 (100%)                                                     |
| 7                  | 36453.0<br>3397                 | 274.3255886            | 0.1812           | 0.0008               | H-2->L+1 (100%)                                                     |
| 8                  | 37717.7<br>1132                 | 265.1274335            | -1.1484          | 0.0009               | H-6->LUMO (54%), H-3->LUMO (43%)                                    |
| 9                  | 37916.1<br>2371                 | 263.7400404            | -1.1852          | 0.0004               | HOMO->L+4 (83%), HOMO->L+5 (12%)                                    |
| 10                 | 38689.6<br>094                  | 258.4673289            | -0.177           | 0.0026               | H-4->LUMO (100%)                                                    |
| 11                 | 39264.6<br>8271                 | 254.6817982            | -0.2796          | 0.0004               | H-8->L+1 (82%), H-7->L+1 (15%)                                      |
| 12                 | 39629.2<br>4531                 | 252.3388957            | 0.4983           | 0.0028               | HOMO->L+2 (98%)                                                     |
| 13                 | 39654.2<br>485                  | 252.1797885            | 0.1636           | 0.0002               | HOMO->L+3 (99%)                                                     |
| 14                 | 39990.5<br>817                  | 250.0588782            | -0.2517          | 0.0014               | H-3->L+1 (100%)                                                     |
| 15                 | 41701.2<br>8364                 | 239.8007717            | 8.9368           | 0.032                | H-7->LUMO (23%), H-5->LUMO (65%)                                    |
| 16                 | 42142.4<br>6892                 | 237.2903216            | -0.0328          | 0                    | H-4->L+1 (100%)                                                     |
| 17                 | 42239.2<br>5545                 | 236.7465973            | -14.1258         | 0.0204               | HOMO->L+4 (11%), HOMO->L+5 (44%), HOMO->L+6 (14%), HOMO->L+11 (11%) |
| 18                 | 42535.2<br>6092                 | 235.0990633            | 12.7086          | 0.0575               | H-5->LUMO (14%), HOMO->L+5 (21%), HOMO->L+6 (12%), HOMO->L+7 (23%)  |
| 19                 | 42647.3<br>7199                 | 234.4810368            | 1.3087           | 0.0013               | H-4->L+3 (38%), H-3->L+2 (51%)                                      |
| 20                 | 42940.9<br>578                  | 232.8778982            | 9.8592           | 0.0216               | H-7->LUMO (21%), HOMO->L+6 (47%)                                    |
| 21                 | 43452.3<br>1331                 | 230.1373446            | -23.6038         | 0.0175               | H-7->LUMO (29%), HOMO->L+7 (16%), HOMO->L+9 (15%)                   |

|    |                 |             |          |        |                                                                             |
|----|-----------------|-------------|----------|--------|-----------------------------------------------------------------------------|
| 22 | 43741.8<br>6635 | 228.6139307 | 0.7419   | 0.0004 | H-1->L+4 (74%)                                                              |
| 23 | 43852.3<br>643  | 228.0378757 | -0.032   | 0.0028 | H-2->L+2 (78%)                                                              |
| 24 | 43995.1<br>2444 | 227.2979137 | -0.8917  | 0.0007 | H-2->L+3 (81%)                                                              |
| 25 | 44104.8<br>1584 | 226.7326098 | -52.0869 | 0.5718 | H-5->L+1 (92%)                                                              |
| 26 | 44304.0<br>3479 | 225.7130767 | 14.0765  | 0.0879 | HOMO->L+7 (11%),<br>HOMO->L+9 (52%)                                         |
| 27 | 44651.6<br>5974 | 223.9558408 | -1.1782  | 0.002  | HOMO->L+5 (12%),<br>HOMO->L+10 (29%),<br>HOMO->L+11 (33%)                   |
| 28 | 44982.3<br>4706 | 222.3094314 | 4.2001   | 0.0052 | HOMO->L+8 (69%)                                                             |
| 29 | 45083.1<br>6636 | 221.8122818 | 0.254    | 0.0002 | H-1->L+3 (86%)                                                              |
| 30 | 45152.5<br>3004 | 221.4715319 | -0.3199  | 0.0043 | H-1->L+2 (81%)                                                              |
| 31 | 45498.5<br>4189 | 219.7872631 | 1.9071   | 0.0028 | H-2->L+4 (25%), H-2->L+6<br>(14%), HOMO->L+10<br>(21%), HOMO->L+11<br>(10%) |
| 32 | 45534.8<br>3684 | 219.6120749 | 13.7761  | 0.0157 | H-2->L+4 (21%), H-2->L+6<br>(10%), HOMO->L+10<br>(25%), HOMO->L+11<br>(12%) |
| 33 | 46518.8<br>3325 | 214.9666985 | 21.1141  | 0.1186 | H-8->LUMO (34%)                                                             |
| 34 | 46550.2<br>8887 | 214.8214381 | -17.7008 | 0.0053 | H-6->L+1 (88%)                                                              |
| 35 | 46746.2<br>816  | 213.9207582 | -12.8576 | 0.1369 | H-8->LUMO (40%),<br>HOMO->L+7 (11%),<br>HOMO->L+12 (14%)                    |
| 36 | 47051.9<br>6572 | 212.5309718 | 4.9202   | 0.0159 | HOMO->L+12 (45%),<br>HOMO->L+15 (34%)                                       |
| 37 | 47129.3<br>9495 | 212.1818031 | -35.3934 | 0.0118 | H-8->L+1 (13%), H-7->L+1<br>(76%)                                           |
| 38 | 47316.5<br>1558 | 211.3426967 | 9.3763   | 0.0246 | H-4->L+2 (24%), H-3->L+3<br>(60%)                                           |
| 39 | 47340.7<br>1221 | 211.2346759 | 1.8049   | 0.0012 | HOMO->L+13 (48%),<br>HOMO->L+14 (22%)                                       |
| 40 | 47768.1<br>8606 | 209.3443529 | 1.5288   | 0.0046 | H-2->L+4 (45%), H-2->L+5<br>(12%), H-2->L+6 (27%)                           |
| 41 | 47860.9<br>3982 | 208.9386468 | -1.817   | 0.0009 | H-9->LUMO (73%), H-<br>8->LUMO (12%)                                        |
| 42 | 47953.6<br>9358 | 208.5345102 | 3.4339   | 0.0082 | HOMO->L+14 (48%)                                                            |
| 43 | 48008.5<br>3928 | 208.2962771 | -1.3812  | 0.0008 | H-1->L+5 (62%), H-<br>1->L+10 (10%)                                         |
| 44 | 48077.0<br>964  | 207.9992501 | 15.1731  | 0.0347 | H-1->L+6 (45%),<br>HOMO->L+15 (14%)                                         |

|    |                 |             |          |        |                                                                |
|----|-----------------|-------------|----------|--------|----------------------------------------------------------------|
| 45 | 48220.6<br>6309 | 207.3799769 | -15.8423 | 0.0116 | H-3->L+4 (29%), H-3->L+6 (22%), H-2->L+5 (15%), H-2->L+6 (13%) |
| 46 | 48288.4<br>1366 | 207.0890146 | 8.1383   | 0.0372 | H-1->L+6 (19%),<br>HOMO->L+17 (15%)                            |
| 47 | 48457.7<br>9009 | 206.3651681 | 17.509   | 0.0163 | H-3->L+4 (21%), H-3->L+6 (15%), H-2->L+5 (25%), H-2->L+6 (20%) |
| 48 | 49078.8<br>37   | 203.7538094 | -6.9608  | 0.0079 | H-2->L+9 (67%), H-1->L+9 (15%)                                 |
| 49 | 49155.4<br>5968 | 203.4362015 | -3.6081  | 0.005  | HOMO->L+16 (56%)                                               |
| 50 | 49340.1<br>6064 | 202.6746543 | -7.0293  | 0.013  | H-2->L+9 (13%), H-1->L+9 (47%)                                 |



**Table S16.** Cartesian coordinates of conformer 3 of 3

| Standard orientation: |               |             |                         |           |           |
|-----------------------|---------------|-------------|-------------------------|-----------|-----------|
| Center Number         | Atomic Number | Atomic Type | Coordinates (Angstroms) |           |           |
|                       |               |             | X                       | Y         | Z         |
| 1                     | 6             | 0           | -1.174786               | 3.850742  | 0.037711  |
| 2                     | 6             | 0           | -0.095722               | 4.726919  | 0.045972  |
| 3                     | 6             | 0           | 1.210311                | 4.236516  | 0.009969  |
| 4                     | 6             | 0           | 1.490968                | 2.860502  | -0.020557 |
| 5                     | 6             | 0           | 0.406582                | 1.96296   | -0.010735 |
| 6                     | 6             | 0           | -0.91597                | 2.456436  | -0.013701 |
| 7                     | 6             | 0           | 2.941782                | 2.478727  | -0.054879 |
| 8                     | 6             | 0           | 3.373374                | 1.03306   | -0.080677 |
| 9                     | 8             | 0           | 3.763785                | 3.402413  | -0.056681 |
| 10                    | 8             | 0           | -2.504941               | 4.18126   | 0.072644  |
| 11                    | 8             | 0           | -0.224918               | 6.089847  | 0.082380  |
| 12                    | 6             | 0           | -2.870064               | 5.551174  | 0.148526  |
| 13                    | 8             | 0           | 2.194196                | 5.207947  | 0.011778  |
| 14                    | 6             | 0           | 4.893154                | 0.876226  | -0.151380 |
| 15                    | 6             | 0           | 5.278898                | -0.581582 | -0.203912 |
| 16                    | 6             | 0           | 5.440251                | -1.2298   | -1.435979 |
| 17                    | 6             | 0           | 5.750893                | -2.589937 | -1.484019 |
| 18                    | 6             | 0           | 5.89774                 | -3.314812 | -0.302666 |
| 19                    | 6             | 0           | 5.736171                | -2.680337 | 0.927781  |
| 20                    | 6             | 0           | 5.427813                | -1.319852 | 0.978068  |
| 21                    | 8             | 0           | 0.670308                | 0.620186  | -0.024522 |
| 22                    | 6             | 0           | -2.087755               | 1.507718  | -0.055842 |
| 23                    | 6             | 0           | -1.691669               | 0.070927  | -0.408655 |
| 24                    | 6             | 0           | -2.871981               | -0.902755 | -0.167779 |
| 25                    | 6             | 0           | -0.377099               | -0.311303 | 0.333966  |
| 26                    | 6             | 0           | 0.111175                | -1.709704 | -0.159665 |
| 27                    | 6             | 0           | -4.13925                | -0.545022 | -0.961259 |
| 28                    | 6             | 0           | -5.232792               | -1.585746 | -0.798051 |
| 29                    | 6             | 0           | -6.34049                | -1.286901 | -0.091207 |
| 30                    | 6             | 0           | -7.461784               | -2.203473 | 0.187329  |
| 31                    | 6             | 0           | 1.456892                | -2.18171  | 0.405263  |
| 32                    | 6             | 0           | 1.870116                | -3.49945  | -0.191545 |
| 33                    | 6             | 0           | 1.763793                | -4.721402 | 0.364469  |
| 34                    | 6             | 0           | 2.281341                | -5.93817  | -0.355508 |
| 35                    | 6             | 0           | 1.137315                | -5.007963 | 1.700205  |
| 36                    | 8             | 0           | -7.536028               | -3.397971 | -0.021137 |
| 37                    | 6             | 0           | -4.982935               | -2.896279 | -1.496317 |
| 38                    | 8             | 0           | -8.467235               | -1.514205 | 0.758742  |
| 39                    | 6             | 0           | -0.519302               | -0.326458 | 1.868616  |
| 40                    | 1             | 0           | 3.010292                | 0.558269  | 0.83711   |
| 41                    | 1             | 0           | 2.928443                | 0.554813  | -0.960068 |
| 42                    | 1             | 0           | 0.700608                | 6.417296  | 0.072094  |
| 43                    | 1             | 0           | -3.963181               | 5.597986  | 0.184464  |
| 44                    | 1             | 0           | -2.497525               | 6.012756  | 1.068275  |
| 45                    | 1             | 0           | -2.553636               | 6.096624  | -0.745888 |

|    |   |   |           |           |           |
|----|---|---|-----------|-----------|-----------|
| 46 | 1 | 0 | 3.062695  | 4.724236  | -0.016472 |
| 47 | 1 | 0 | 5.292165  | 1.396037  | -1.031915 |
| 48 | 1 | 0 | 5.369552  | 1.351161  | 0.715958  |
| 49 | 1 | 0 | 5.318943  | -0.679601 | -2.366019 |
| 50 | 1 | 0 | 5.873918  | -3.084893 | -2.443445 |
| 51 | 1 | 0 | 6.134391  | -4.374463 | -0.340433 |
| 52 | 1 | 0 | 5.845194  | -3.246472 | 1.848799  |
| 53 | 1 | 0 | 5.295349  | -0.840578 | 1.94513   |
| 54 | 1 | 0 | -2.597281 | 1.538543  | 0.91535   |
| 55 | 1 | 0 | -2.794803 | 1.864643  | -0.814795 |
| 56 | 1 | 0 | -1.466406 | 0.062449  | -1.486145 |
| 57 | 1 | 0 | -3.118506 | -0.934664 | 0.900538  |
| 58 | 1 | 0 | -2.569427 | -1.914867 | -0.452196 |
| 59 | 1 | 0 | 0.195584  | -1.680095 | -1.254841 |
| 60 | 1 | 0 | -0.633764 | -2.475135 | 0.084865  |
| 61 | 1 | 0 | -3.899057 | -0.440278 | -2.026621 |
| 62 | 1 | 0 | -4.512857 | 0.433162  | -0.636339 |
| 63 | 1 | 0 | -6.450077 | -0.301778 | 0.35434   |
| 64 | 1 | 0 | 2.240009  | -1.461529 | 0.164152  |
| 65 | 1 | 0 | 1.426591  | -2.242052 | 1.496186  |
| 66 | 1 | 0 | 2.332232  | -3.415483 | -1.175062 |
| 67 | 1 | 0 | 3.039084  | -6.443365 | 0.252476  |
| 68 | 1 | 0 | 1.464438  | -6.640946 | -0.549238 |
| 69 | 1 | 0 | 2.741113  | -5.688686 | -1.317652 |
| 70 | 1 | 0 | 0.370066  | -5.782901 | 1.596509  |
| 71 | 1 | 0 | 1.896111  | -5.366467 | 2.403192  |
| 72 | 1 | 0 | 0.648762  | -4.137912 | 2.145245  |
| 73 | 1 | 0 | -4.390308 | -3.560487 | -0.859914 |
| 74 | 1 | 0 | -5.904531 | -3.409009 | -1.781138 |
| 75 | 1 | 0 | -4.430558 | -2.734043 | -2.428562 |
| 76 | 1 | 0 | -9.167498 | -2.180487 | 0.918222  |
| 77 | 1 | 0 | -0.949733 | 0.602968  | 2.253581  |
| 78 | 1 | 0 | -1.148371 | -1.154859 | 2.208765  |
| 79 | 1 | 0 | 0.458836  | -0.411205 | 2.354607  |

## 7.4 ECD calculation for 4

The conformational analysis of compound **4** was performed in the SYBYL 8.1 program by using MMFF94s molecular force field, which afforded 38 conformers of **4**, with an energy cutoff of 10 kcal mol<sup>-1</sup> to the global minima. All the obtained conformers were further optimized using DFT at the CAM-B3LYP/6-31+G(d) level in acetonitrile by using Gaussian09 software,<sup>[3]</sup> and 16 conformers of **4** were selected. All of the optimized stable conformers were used for TDDFT computation of the excited states at the same levels, with the consideration of the first 30 excitations. The overall ECD curves of **4** were weighted by Boltzmann distribution of each conformer (with a half-bandwidth of 0.18 eV), with a UV correction of 3 nm. The calculated ECD spectra of **4** were subsequently compared with the experimental one. The ECD spectra were produced by SpecDis 1.71 software.<sup>[4]</sup>

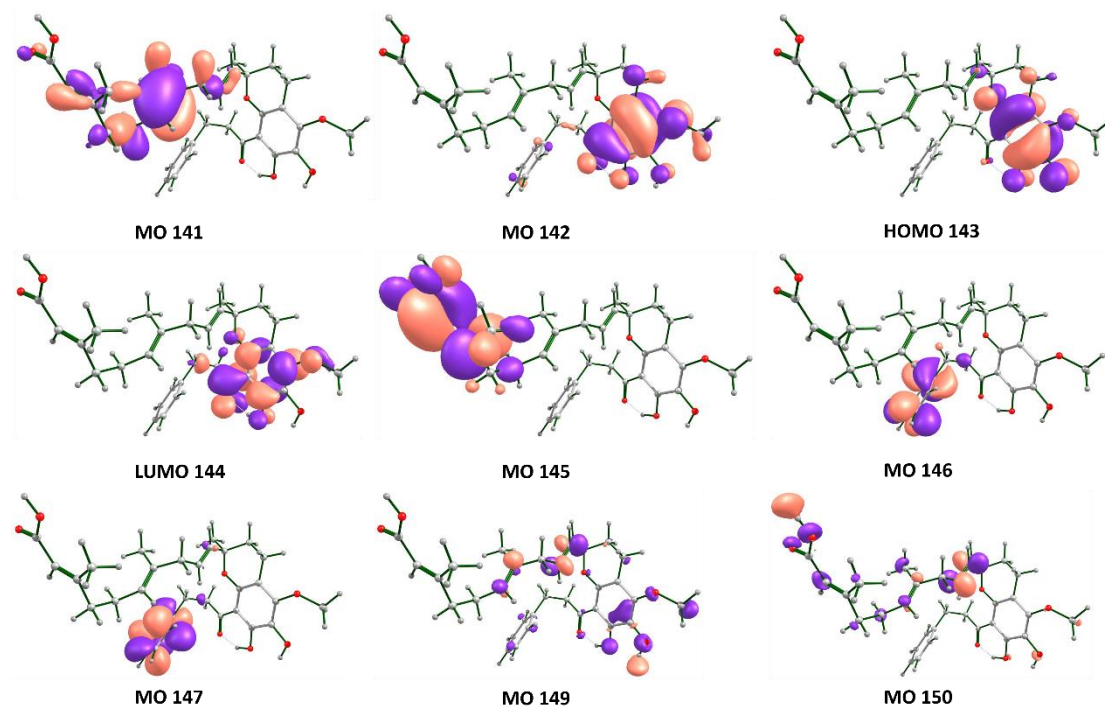

**Fig. S11.** Key molecular orbitals involved in important transitions regarding the ECD spectra of conformer 2 in acetonitrile at the CAM-B3LYP/6-31+G(d) level.

**Table S15.** Key transitions and their related rotatory and oscillator strengths of conformer 2 of **4** at the CAM-B3LYP/6-31+G(d) level in acetonitrile.

| <b>HOMO is 143</b> |                                 |                        |                   |                      |                                                                              |
|--------------------|---------------------------------|------------------------|-------------------|----------------------|------------------------------------------------------------------------------|
| <b>No.</b>         | <b>Energy (cm<sup>-1</sup>)</b> | <b>Wavelength (nm)</b> | <b>R (length)</b> | <b>Osc. Strength</b> | <b>Major contribs</b>                                                        |
| 1                  | 26094.45544                     | 383.2231725            | 20.0537           | 0.0694               | HOMO->LUMO (98%)                                                             |
| 2                  | 31368.51485                     | 318.790993             | 0.0369            | 0                    | HOMO->L+1 (100%)                                                             |
| 3                  | 32587.21859                     | 306.8687796            | -64.9959          | 0.1054               | H-7->LUMO (31%),<br>H-3->LUMO (44%),<br>H-1->LUMO (23%)                      |
| 4                  | 33659.12943                     | 297.0962164            | 50.1804           | 0.3177               | H-7->LUMO (19%),<br>H-1->LUMO (71%)                                          |
| 5                  | 34258.39937                     | 291.8992184            | -0.6008           | 0.0011               | H-2->LUMO (98%)                                                              |
| 6                  | 34877.02662                     | 286.7216896            | 15.7157           | 0.0604               | H-2->L+1 (99%)                                                               |
| 7                  | 36313.50006                     | 275.3796793            | -0.9744           | 0.0098               | H-7->LUMO (43%),<br>H-3->LUMO (46%)                                          |
| 8                  | 36731.29525                     | 272.2474101            | -2.6742           | 0.0027               | H-4->LUMO (97%)                                                              |
| 9                  | 36983.74679                     | 270.3890457            | 0.0157            | 0                    | H-1->L+1 (100%)                                                              |
| 10                 | 37028.91384                     | 270.0592311            | -0.6432           | 0.0006               | H-5->LUMO (93%)                                                              |
| 11                 | 37940.32034                     | 263.5718389            | -2.2289           | 0.0003               | HOMO->L+2 (25%),<br>HOMO->L+5 (61%)                                          |
| 12                 | 38824.30399                     | 257.5706187            | -1.5714           | 0.0004               | HOMO->L+2 (73%),<br>HOMO->L+5 (19%)                                          |
| 13                 | 39211.45012                     | 255.0275486            | 1.1279            | 0.0034               | HOMO->L+3 (64%),<br>HOMO->L+4 (29%)                                          |
| 14                 | 39611.50112                     | 252.4519323            | -1.1338           | 0.0005               | HOMO->L+3 (32%),<br>HOMO->L+4 (53%),<br>HOMO->L+5 (11%)                      |
| 15                 | 39663.1206                      | 252.1233793            | 0.1883            | 0.0002               | H-3->L+1 (100%)                                                              |
| 16                 | 40540.65182                     | 246.6659896            | -0.41             | 0                    | H-9->L+1 (97%)                                                               |
| 17                 | 40703.57581                     | 245.6786609            | 2.5421            | 0.0036               | H-4->L+1 (99%)                                                               |
| 18                 | 41484.3205                      | 241.0549306            | 0.9273            | 0.0018               | H-5->L+1 (99%)                                                               |
| 19                 | 41985.99736                     | 238.1746446            | 16.1498           | 0.0541               | H-8->LUMO (69%),<br>HOMO->L+9 (16%)                                          |
| 20                 | 42485.25455                     | 235.3757817            | -1.2822           | 0.001                | H-6->LUMO (20%),<br>HOMO->L+6 (36%),<br>HOMO->L+7 (18%)                      |
| 21                 | 42549.7789                      | 235.0188475            | -1.4433           | 0.0087               | H-6->LUMO (72%),<br>HOMO->L+6 (10%)                                          |
| 22                 | 42616.72292                     | 234.6496707            | -0.2967           | 0.0019               | H-5->L+2 (23%), H-<br>5->L+3 (12%), H-<br>3->L+2 (17%), H-<br>3->L+3 (26%)   |
| 23                 | 42920.79394                     | 232.9873025            | -4.2961           | 0.0067               | HOMO->L+6 (24%),<br>HOMO->L+7 (48%)                                          |
| 24                 | 43272.45167                     | 231.0939088            | -28.0881          | 0.0403               | H-8->LUMO (14%),<br>HOMO->L+7 (16%),<br>HOMO->L+9 (25%),<br>HOMO->L+10 (13%) |
| 25                 | 43816.87591                     | 228.2225693            | 1.3034            | 0.0037               | H-1->L+2 (37%), H-<br>1->L+5 (28%)                                           |

|    |             |             |          |        |                                                                                |
|----|-------------|-------------|----------|--------|--------------------------------------------------------------------------------|
| 26 | 44138.69113 | 226.5585985 | -22.7301 | 0.0485 | H-1->L+2 (14%),<br>HOMO->L+8 (55%)                                             |
| 27 | 44466.95878 | 224.8860789 | -17.1936 | 0.0077 | H-1->L+2 (31%), H-<br>1->L+3 (14%), H-<br>1->L+5 (39%)                         |
| 28 | 44557.29288 | 224.4301517 | 55.2823  | 0.396  | H-6->L+1 (34%), H-<br>2->L+3 (12%), H-<br>2->L+4 (41%)                         |
| 29 | 44811.35752 | 223.1577116 | 8.9498   | 0.0132 | HOMO->L+10 (29%),<br>HOMO->L+11 (14%),<br>HOMO->L+12 (20%)                     |
| 30 | 44895.23918 | 222.7407668 | -3.8698  | 0.005  | H-1->L+3 (64%), H-<br>1->L+4 (10%)                                             |
| 31 | 44971.86185 | 222.361263  | -10.0062 | 0.0861 | H-6->L+1 (17%), H-<br>2->L+2 (73%)                                             |
| 32 | 45311.42127 | 220.6949092 | -1.2472  | 0.1597 | H-6->L+1 (36%), H-<br>2->L+2 (10%), H-<br>2->L+3 (35%), H-<br>2->L+4 (12%)     |
| 33 | 45374.33251 | 220.388917  | 10.3317  | 0.0049 | H-1->L+4 (68%), H-<br>1->L+5 (16%)                                             |
| 34 | 45813.90468 | 218.2743442 | -37.5489 | 0.0425 | H-2->L+3 (50%), H-<br>2->L+4 (37%)                                             |
| 35 | 45916.33709 | 217.7874071 | -2.064   | 0.0017 | H-7->L+1 (93%)                                                                 |
| 36 | 45917.9502  | 217.7797562 | 13.0268  | 0.0386 | HOMO->L+9 (14%),<br>HOMO->L+10 (23%),<br>HOMO->L+12 (21%),<br>HOMO->L+13 (10%) |
| 37 | 46006.67118 | 217.3597816 | 22.9432  | 0.0436 | HOMO->L+11 (38%),<br>HOMO->L+12 (22%)                                          |
| 38 | 46507.54149 | 215.0188911 | -36.7343 | 0.0595 | HOMO->L+11 (35%),<br>HOMO->L+13 (18%),<br>HOMO->L+15 (27%)                     |
| 39 | 46663.20649 | 214.301604  | -23.6949 | 0.059  | HOMO->L+13 (41%),<br>HOMO->L+14 (26%)                                          |
| 40 | 46962.43818 | 212.9361334 | 43.9209  | 0.0138 | H-2->L+5 (47%), H-<br>2->L+6 (31%)                                             |
| 41 | 47051.15917 | 212.534615  | -38.0673 | 0.0417 | H-5->L+2 (10%), H-<br>3->L+2 (42%), H-<br>3->L+3 (19%)                         |
| 42 | 47389.10548 | 211.0189652 | -0.7714  | 0.0008 | HOMO->L+14 (22%),<br>HOMO->L+15 (46%)                                          |
| 43 | 47756.8943  | 209.3938508 | -0.0004  | 0      | H-9->LUMO (100%)                                                               |
| 44 | 47931.91661 | 208.6292539 | 34.5081  | 0.0551 | H-1->L+9 (10%),<br>HOMO->L+14 (13%),<br>HOMO->L+16 (24%),<br>HOMO->L+19 (19%)  |
| 45 | 48089.19472 | 207.9469215 | -5.5892  | 0.0026 | H-8->L+1 (89%)                                                                 |
| 46 | 48106.93892 | 207.8702205 | 13.1878  | 0.0184 | H-8->L+1 (10%), H-<br>1->L+6 (17%),<br>HOMO->L+16 (25%)                        |
| 47 | 48198.07957 | 207.4771462 | -17.2591 | 0.0382 | H-1->L+6 (20%), H-<br>1->L+8 (13%),<br>HOMO->L+16 (13%)                        |

|    |             |             |         |        |                                |
|----|-------------|-------------|---------|--------|--------------------------------|
| 48 | 48298.89887 | 207.0440576 | 6.1037  | 0.0047 | H-2->L+5 (29%), H-2->L+6 (48%) |
| 49 | 48319.06273 | 206.9576568 | 0.7092  | 0.0004 | H-10->LUMO (84%)               |
| 50 | 48501.34403 | 206.1798533 | -1.1245 | 0.004  | H-1->L+6 (12%), H-1->L+7 (64%) |

**Table S18.** Cartesian coordinates of conformer 2 of 4

| Standard orientation: |               |             |                         |           |           |
|-----------------------|---------------|-------------|-------------------------|-----------|-----------|
| Center Number         | Atomic Number | Atomic Type | Coordinates (Angstroms) |           |           |
|                       |               |             | X                       | Y         | Z         |
| 1                     | 8             | 0           | 3.649891                | 2.803253  | -0.358259 |
| 2                     | 8             | 0           | 2.311719                | -0.526962 | 1.761444  |
| 3                     | 8             | 0           | 4.581221                | 1.276068  | -2.087431 |
| 4                     | 1             | 0           | 4.300585                | 2.125164  | -1.620097 |
| 5                     | 8             | 0           | 4.387938                | -3.416184 | -1.39092  |
| 6                     | 8             | 0           | 5.118229                | -1.118679 | -2.991161 |
| 7                     | 1             | 0           | 5.264783                | -0.208369 | -3.308684 |
| 8                     | 8             | 0           | -8.982357               | -0.41867  | 0.820386  |
| 9                     | 6             | 0           | 3.462817                | 0.471408  | -0.070941 |
| 10                    | 8             | 0           | -8.181757               | -2.312079 | -0.085665 |
| 11                    | 1             | 0           | -8.921851               | -2.640886 | 0.458332  |
| 12                    | 6             | 0           | 4.169133                | 0.265379  | -1.291552 |
| 13                    | 6             | 0           | 3.270947                | 1.86124   | 0.374945  |
| 14                    | 6             | 0           | 4.135798                | -2.131353 | -1.022737 |
| 15                    | 6             | 0           | 3.068662                | -3.215394 | 0.997896  |
| 16                    | 1             | 0           | 3.910749                | -3.91504  | 0.981159  |
| 17                    | 1             | 0           | 2.223551                | -3.747637 | 0.539426  |
| 18                    | 6             | 0           | 3.06029                 | -0.712735 | 0.629318  |
| 19                    | 6             | 0           | 3.416998                | -1.986363 | 0.189771  |
| 20                    | 6             | 0           | 4.485651                | -1.0101   | -1.775796 |
| 21                    | 6             | 0           | 2.662828                | 2.259111  | 1.707321  |
| 22                    | 1             | 0           | 3.112384                | 3.225002  | 1.959432  |
| 23                    | 1             | 0           | 2.91443                 | 1.5334    | 2.48186   |
| 24                    | 6             | 0           | -0.189909               | -1.513343 | 0.778694  |
| 25                    | 1             | 0           | 0.28382                 | -0.673357 | 0.272326  |
| 26                    | 6             | 0           | -6.134594               | -0.625996 | -1.45263  |
| 27                    | 6             | 0           | 1.731719                | -1.660545 | 2.460505  |
| 28                    | 6             | 0           | 0.410103                | -2.067469 | 1.835511  |
| 29                    | 1             | 0           | -0.068142               | -2.911827 | 2.337623  |
| 30                    | 6             | 0           | -8.166548               | -0.958691 | 0.090329  |
| 31                    | 6             | 0           | 1.501185                | -1.155305 | 3.890428  |
| 32                    | 1             | 0           | 2.454553                | -0.890048 | 4.360639  |
| 33                    | 1             | 0           | 1.020526                | -1.932918 | 4.494231  |
| 34                    | 1             | 0           | 0.852025                | -0.274221 | 3.885538  |
| 35                    | 6             | 0           | -2.99479                | -0.308145 | -0.91414  |
| 36                    | 1             | 0           | -2.535289               | -0.658502 | -1.842319 |
| 37                    | 6             | 0           | 2.727994                | -2.830081 | 2.436459  |
| 38                    | 1             | 0           | 2.303326                | -3.683466 | 2.978394  |
| 39                    | 1             | 0           | 3.634988                | -2.52073  | 2.972424  |
| 40                    | 6             | 0           | 0.614581                | 3.531388  | 0.768349  |
| 41                    | 6             | 0           | 0.108845                | 3.258367  | -0.509975 |
| 42                    | 1             | 0           | 0.065447                | 2.228789  | -0.859654 |
| 43                    | 6             | 0           | 1.115211                | 2.419367  | 1.666991  |
| 44                    | 1             | 0           | 0.664414                | 1.466365  | 1.375432  |
| 45                    | 1             | 0           | 0.793016                | 2.614122  | 2.69833   |

|    |   |   |           |           |           |
|----|---|---|-----------|-----------|-----------|
| 46 | 6 | 0 | -1.509509 | -1.965457 | 0.1955    |
| 47 | 1 | 0 | -1.861477 | -2.852297 | 0.742829  |
| 48 | 1 | 0 | -1.347448 | -2.274196 | -0.846492 |
| 49 | 6 | 0 | -7.132805 | -0.208347 | -0.640279 |
| 50 | 1 | 0 | -7.233643 | 0.858233  | -0.452924 |
| 51 | 6 | 0 | -2.583095 | -0.883769 | 0.229768  |
| 52 | 6 | 0 | 0.64838   | 4.867095  | 1.19694   |
| 53 | 1 | 0 | 1.031274  | 5.101068  | 2.189042  |
| 54 | 6 | 0 | -4.005044 | 0.792302  | -1.102378 |
| 55 | 1 | 0 | -3.499465 | 1.653029  | -1.565352 |
| 56 | 1 | 0 | -4.398011 | 1.145542  | -0.14427  |
| 57 | 6 | 0 | -5.20157  | 0.426687  | -2.027833 |
| 58 | 1 | 0 | -5.764543 | 1.347801  | -2.21978  |
| 59 | 1 | 0 | -4.811244 | 0.082494  | -2.994975 |
| 60 | 6 | 0 | -0.296141 | 5.613646  | -0.903774 |
| 61 | 1 | 0 | -0.64541  | 6.416194  | -1.548549 |
| 62 | 6 | 0 | -0.340549 | 4.288059  | -1.341757 |
| 63 | 1 | 0 | -0.722978 | 4.053366  | -2.332383 |
| 64 | 6 | 0 | 0.199404  | 5.900144  | 0.372036  |
| 65 | 1 | 0 | 0.234854  | 6.928011  | 0.725049  |
| 66 | 6 | 0 | -3.100624 | -0.548622 | 1.607564  |
| 67 | 1 | 0 | -3.880286 | 0.215972  | 1.601523  |
| 68 | 1 | 0 | -2.286723 | -0.197551 | 2.255237  |
| 69 | 1 | 0 | -3.516841 | -1.445988 | 2.087202  |
| 70 | 6 | 0 | 5.545127  | -3.748655 | -2.175866 |
| 71 | 1 | 0 | 6.434062  | -3.240248 | -1.788554 |
| 72 | 1 | 0 | 5.402163  | -3.486727 | -3.22529  |
| 73 | 1 | 0 | 5.657503  | -4.829335 | -2.064905 |
| 74 | 6 | 0 | -5.835367 | -2.043084 | -1.859343 |
| 75 | 1 | 0 | -6.46398  | -2.779112 | -1.362721 |
| 76 | 1 | 0 | -4.780923 | -2.268488 | -1.65581  |
| 77 | 1 | 0 | -5.970031 | -2.14203  | -2.946341 |



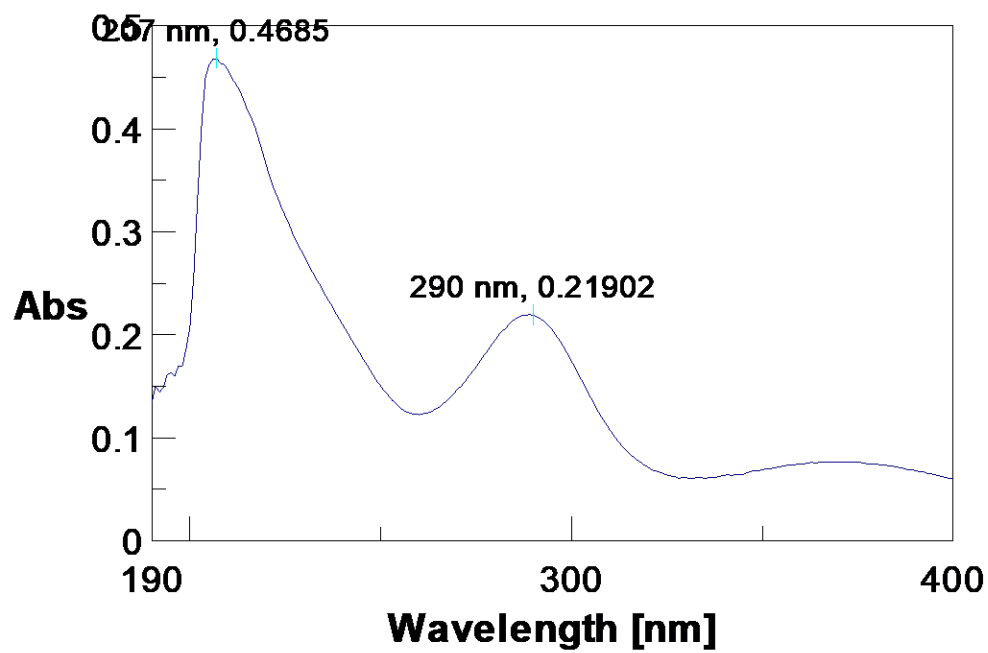

Fig. S9. UV spectrum of 1 in MeOH

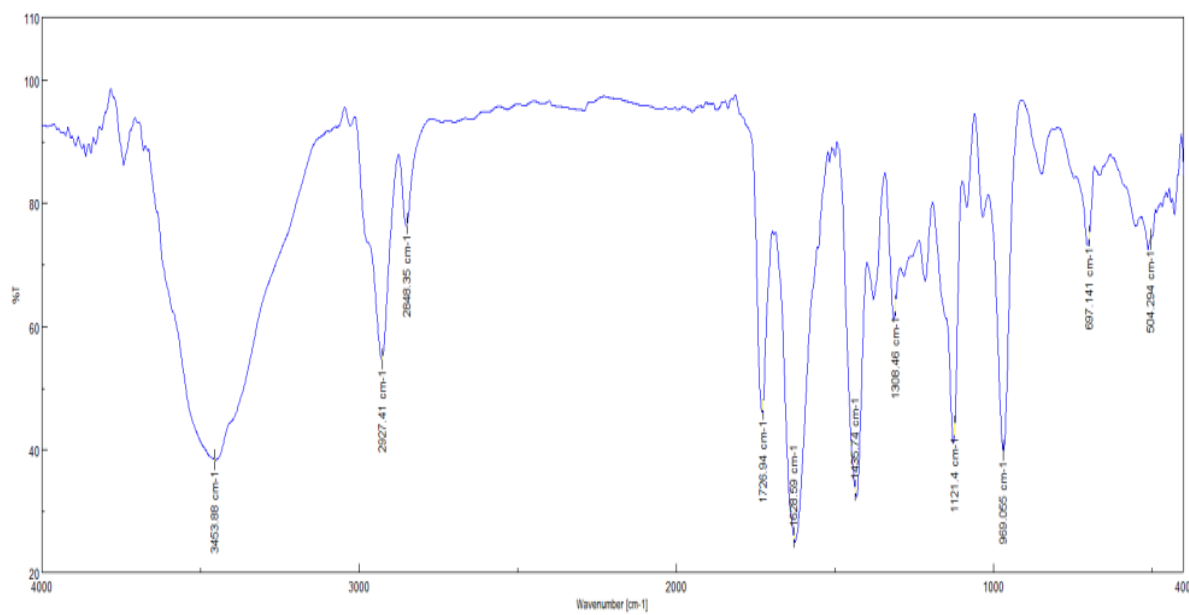

Fig. S10. IR spectrum of 1 (KBr disc)

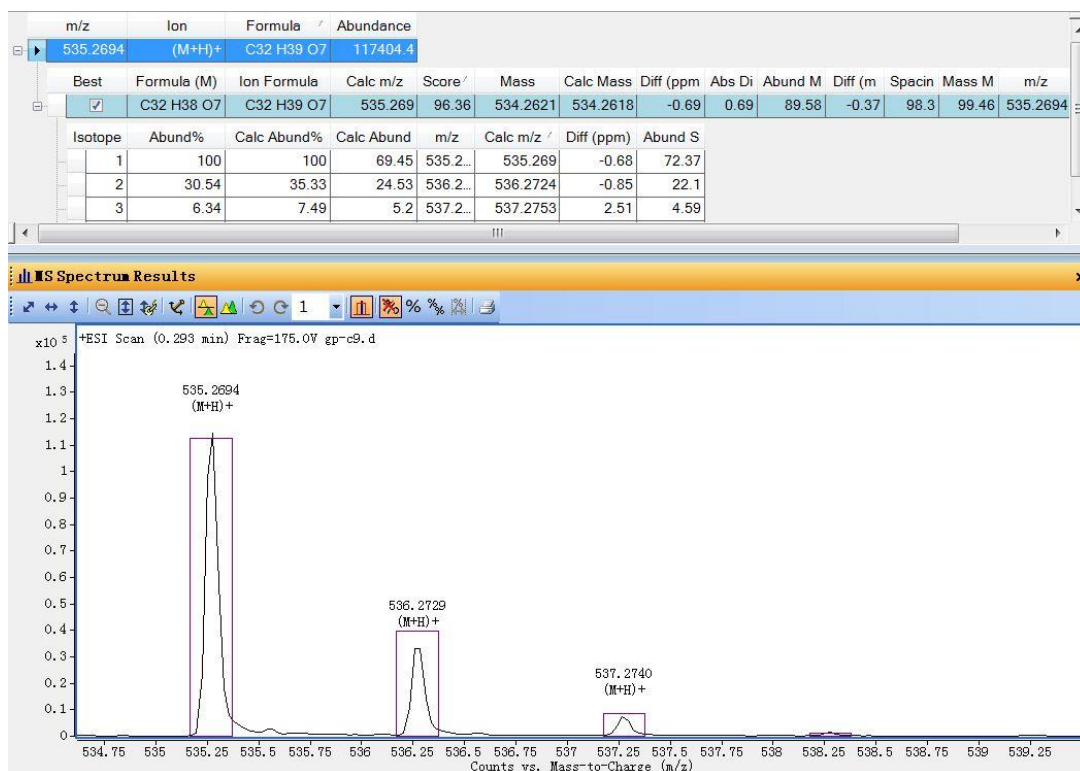

**Fig. S11.** HR-ESI-MS spectrum of **1**

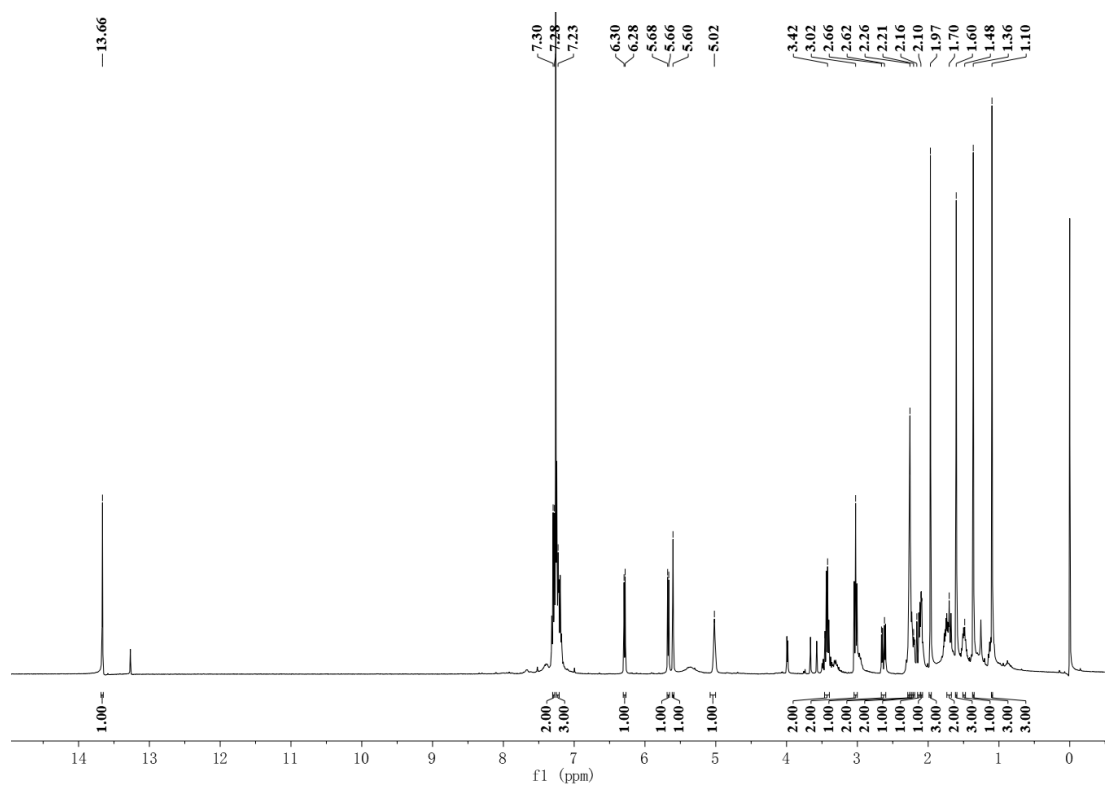

**Fig. S12.** <sup>1</sup>H NMR spectrum of **1** in CDCl<sub>3</sub>

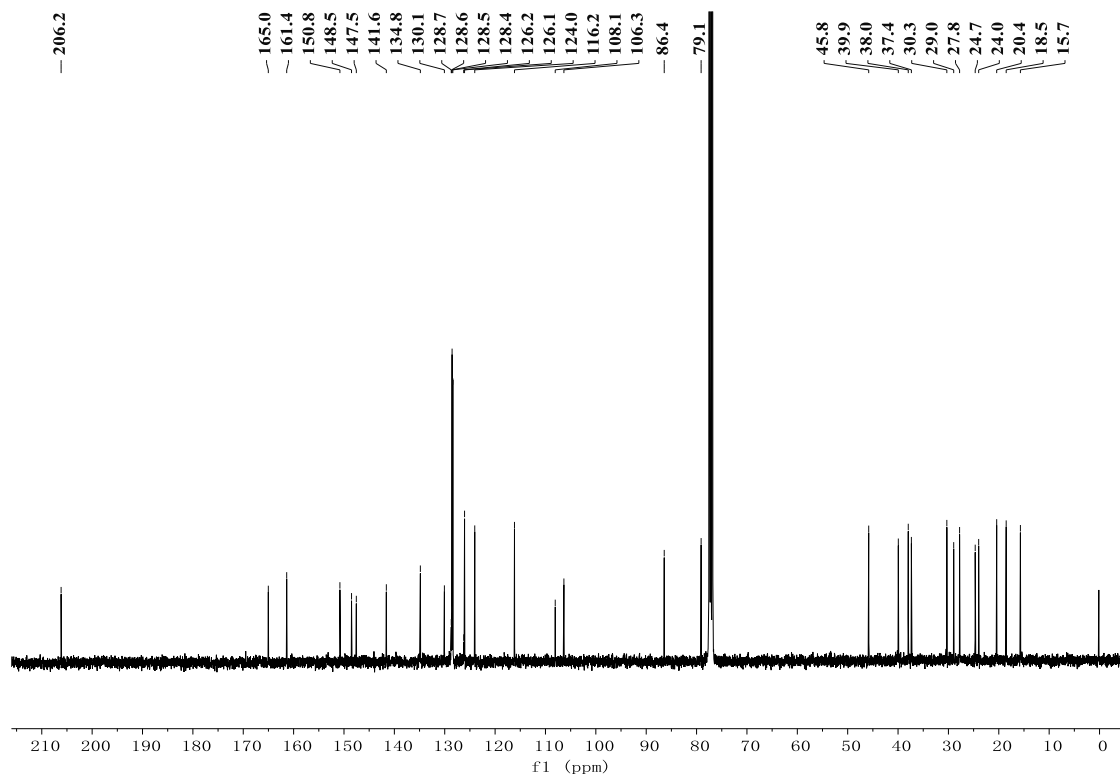

**Fig. S13.**  $^{13}\text{C}$  NMR spectrum of **1** in  $\text{CDCl}_3$

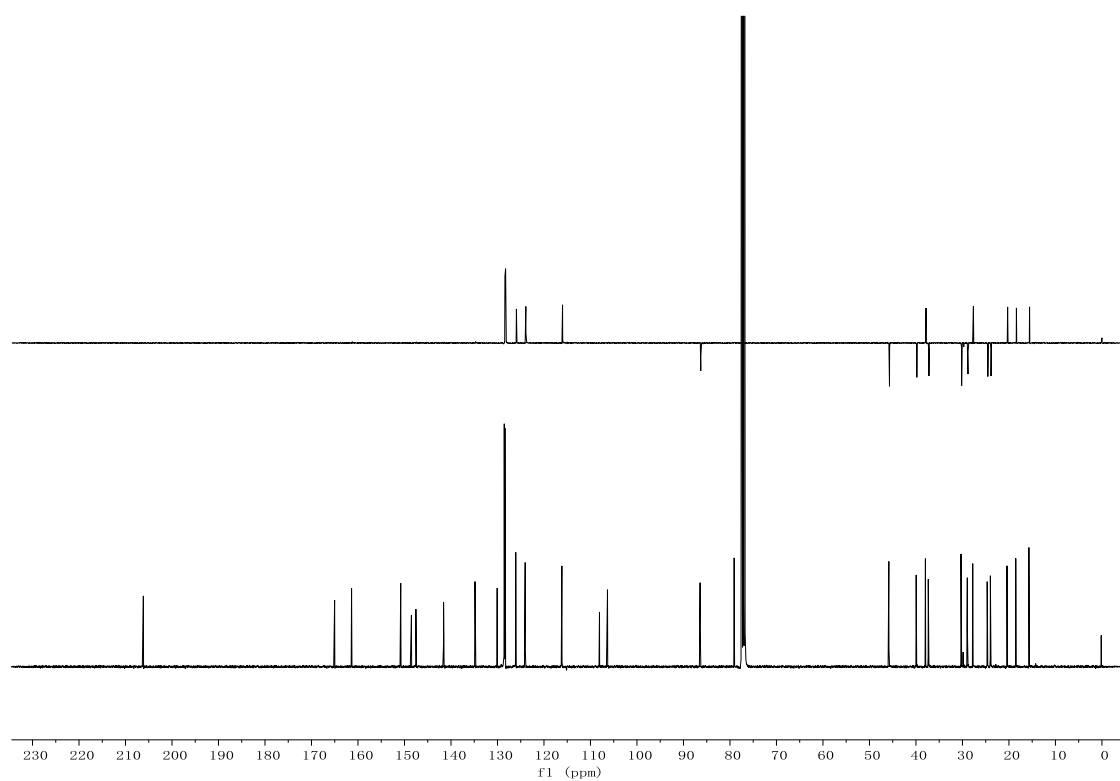

**Fig. S14.** DEPT-135 and  $^{13}\text{C}$  NMR spectra of **1** in  $\text{CDCl}_3$

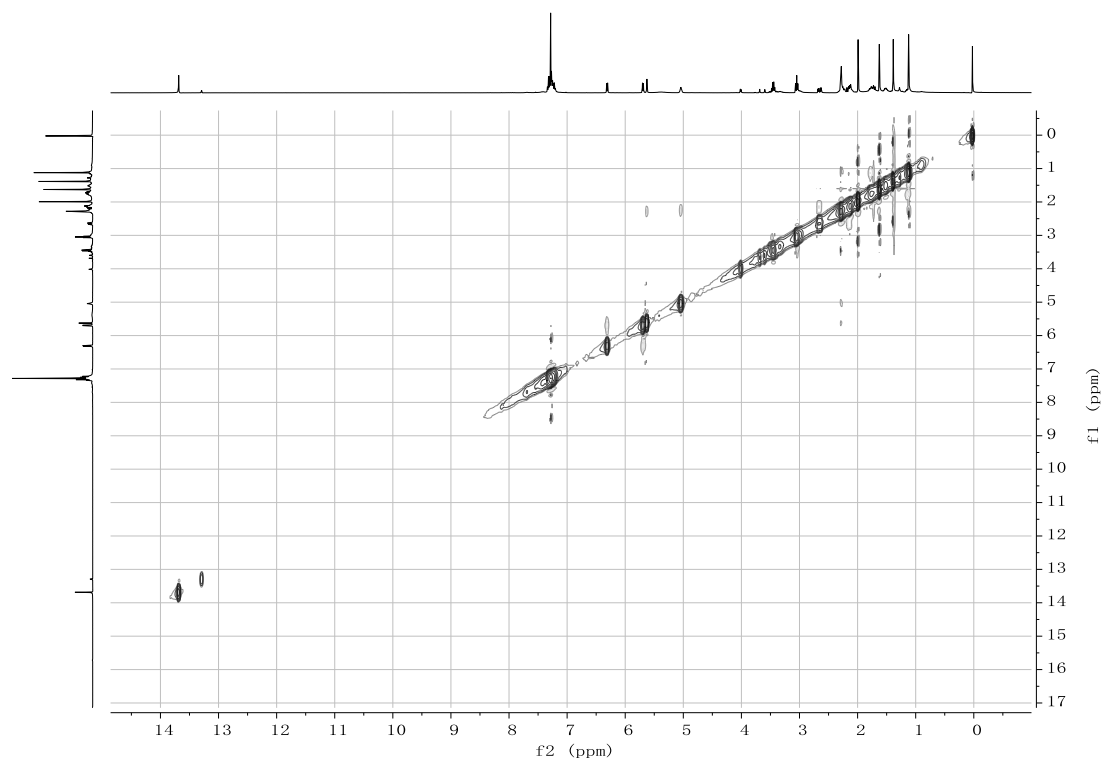

**Fig. S15.**  $^1\text{H}$ - $^1\text{H}$  COSY spectrum of **1** in  $\text{CDCl}_3$

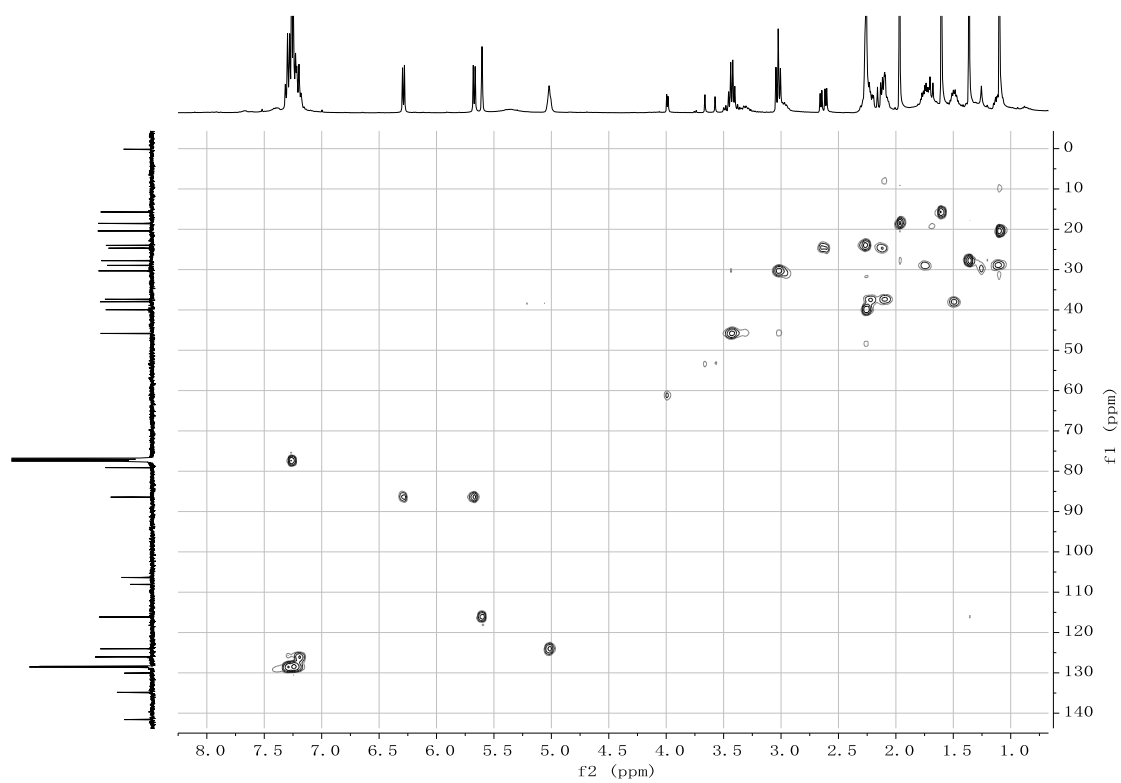

**Fig. S16.** HSQC spectrum of **1** in  $\text{CDCl}_3$

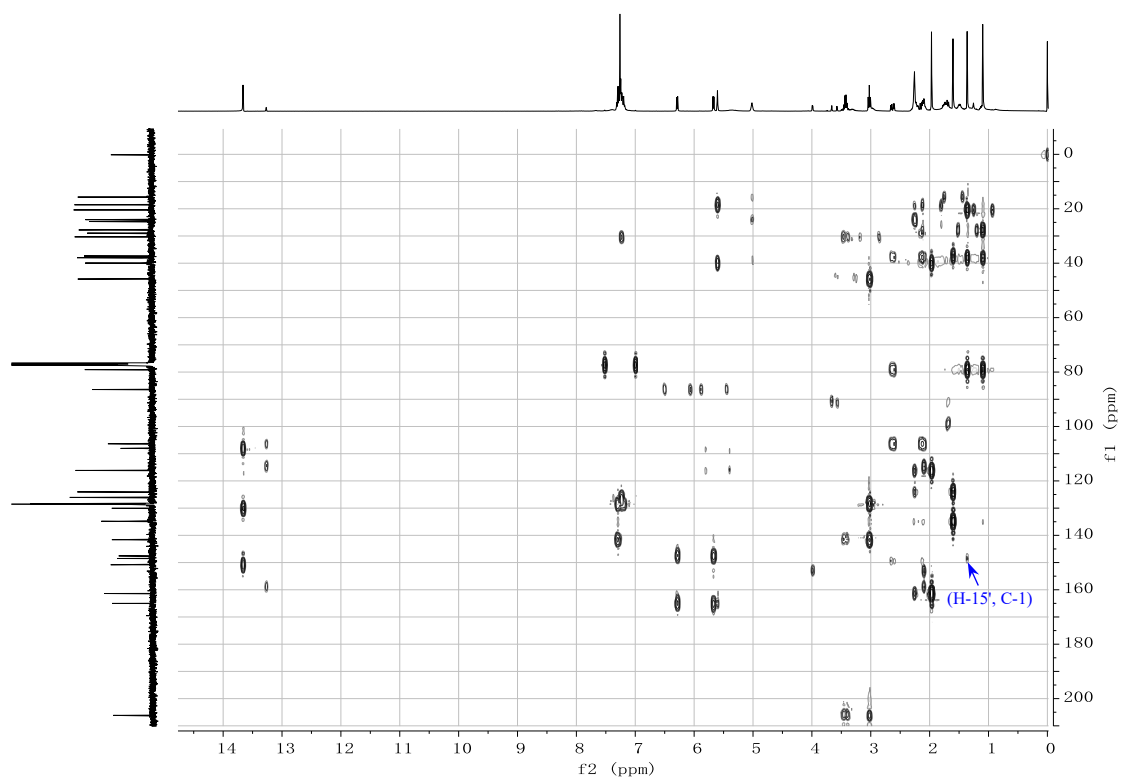

**Fig. S17.** HMBC spectrum of **1** in CDCl<sub>3</sub>

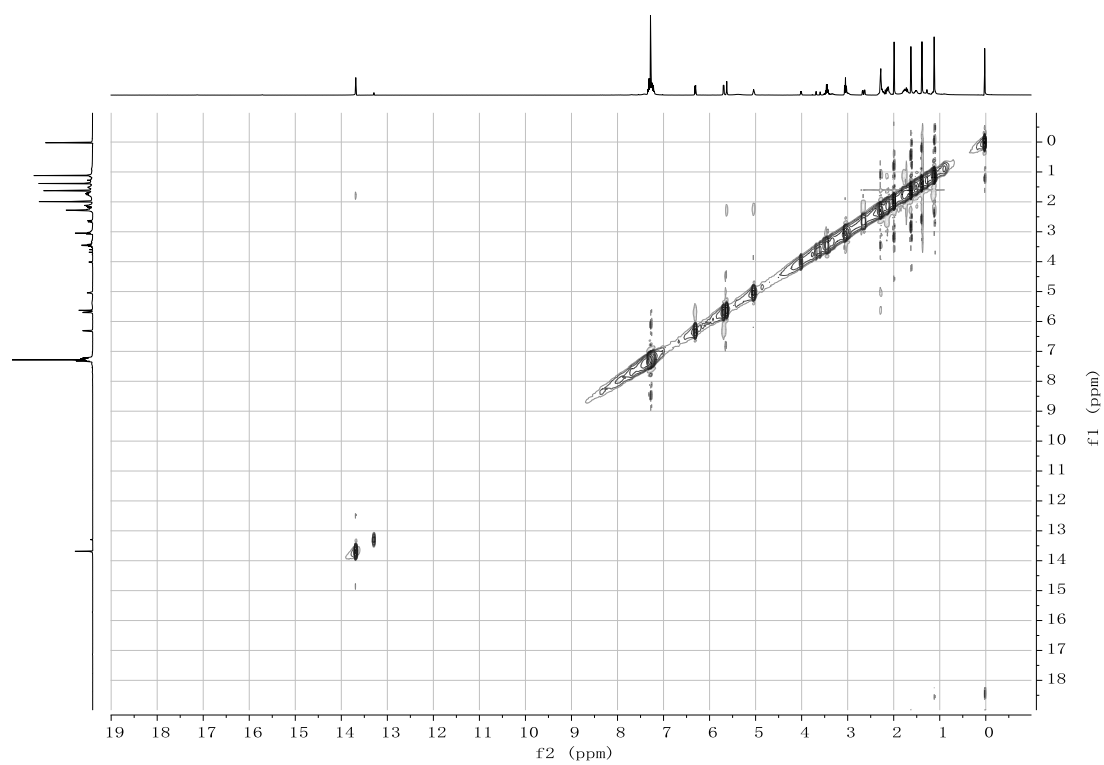

**Fig. S18.** NOESY spectrum of **1** in CDCl<sub>3</sub>

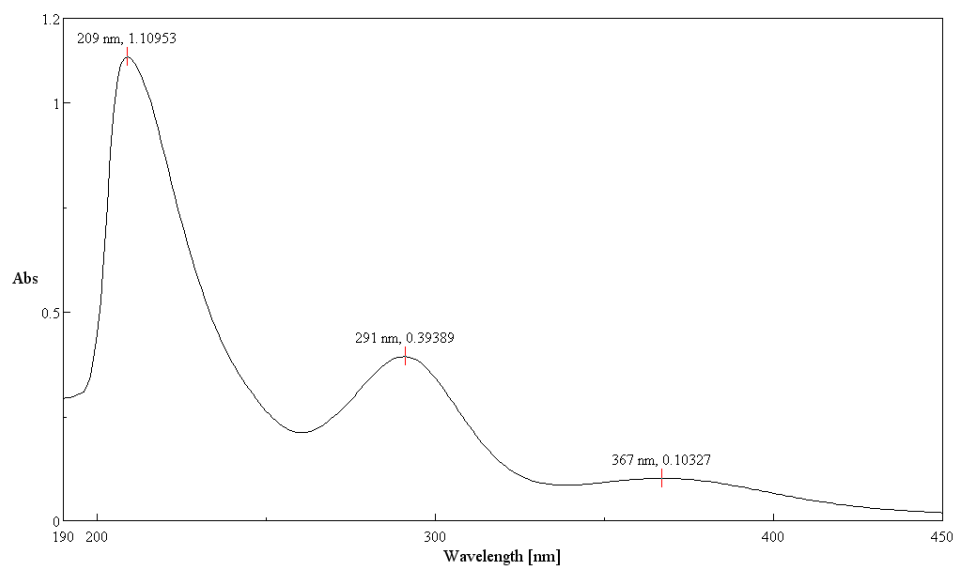

**Fig. S19.** UV spectrum of **2** in MeOH

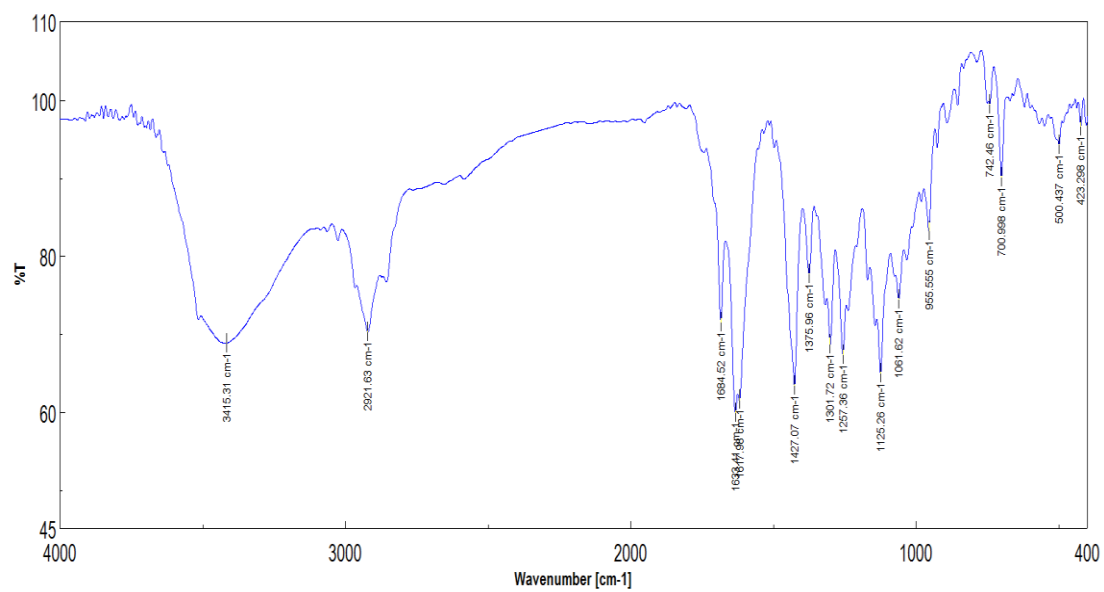

**Fig. S20.** IR spectrum of **2** (KBr disc)

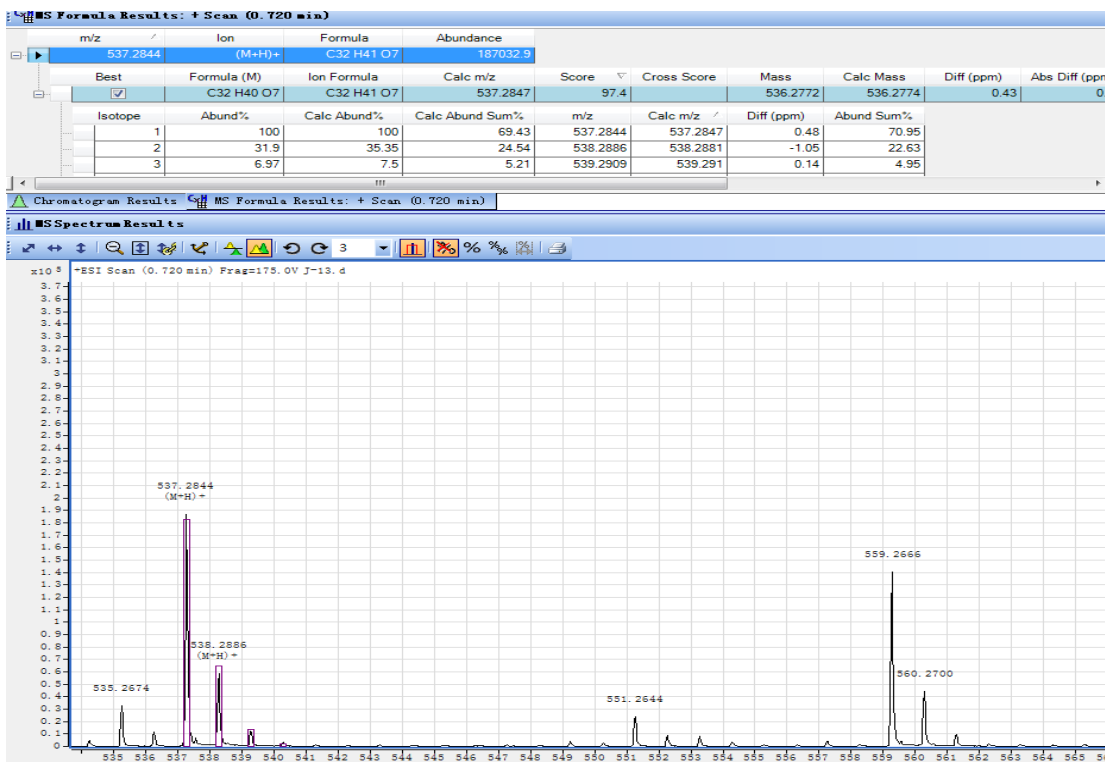

Fig. S21. HR-ESI-MS spectrum of **2**

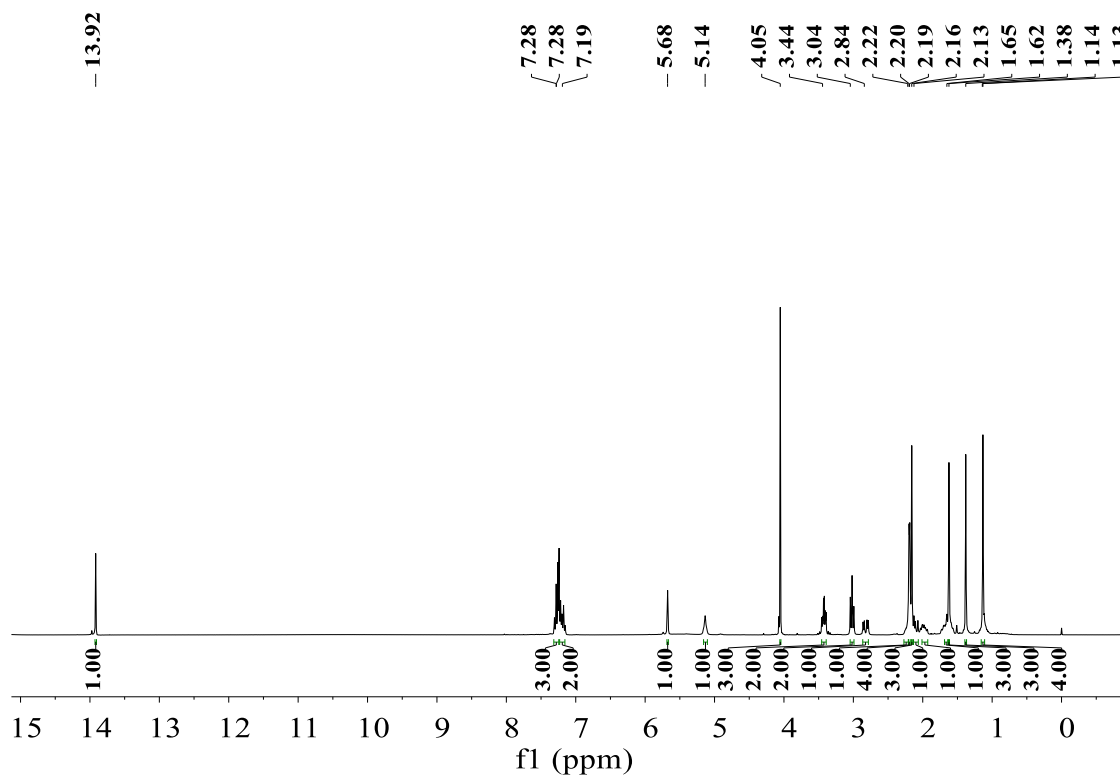

Fig. S22. <sup>1</sup>H NMR spectrum of **2** in CDCl<sub>3</sub>

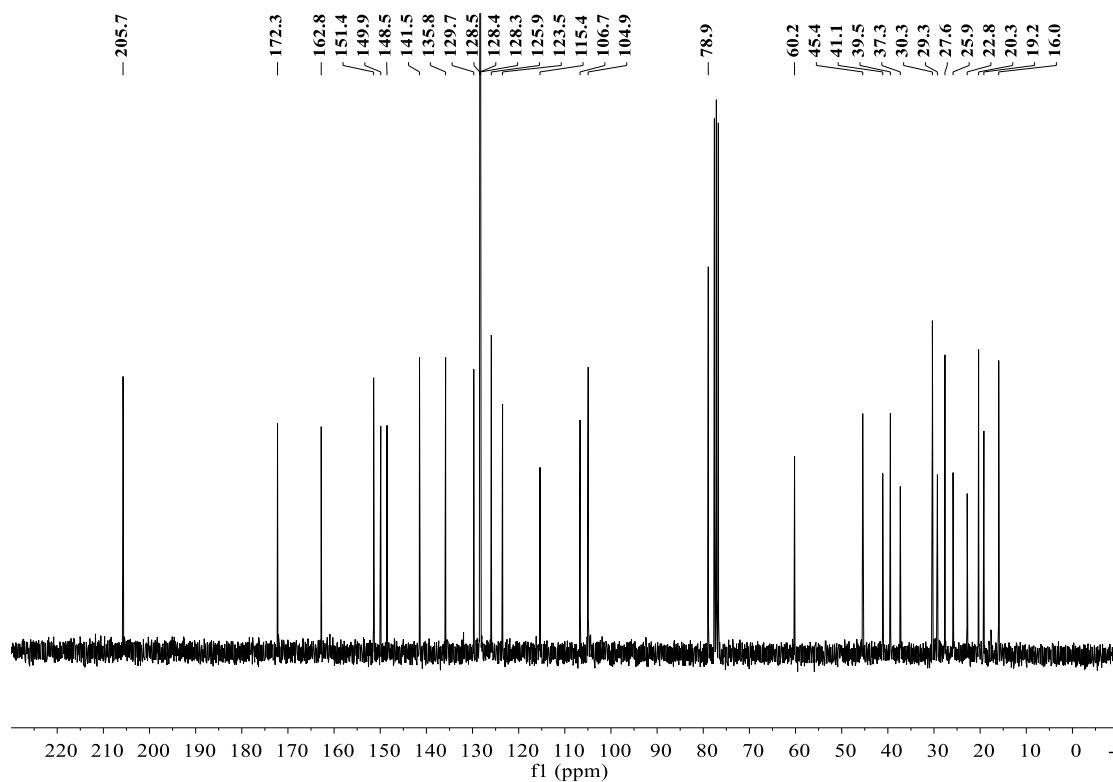

Fig. S23.  $^{13}\text{C}$  NMR spectrum of **2** in  $\text{CDCl}_3$

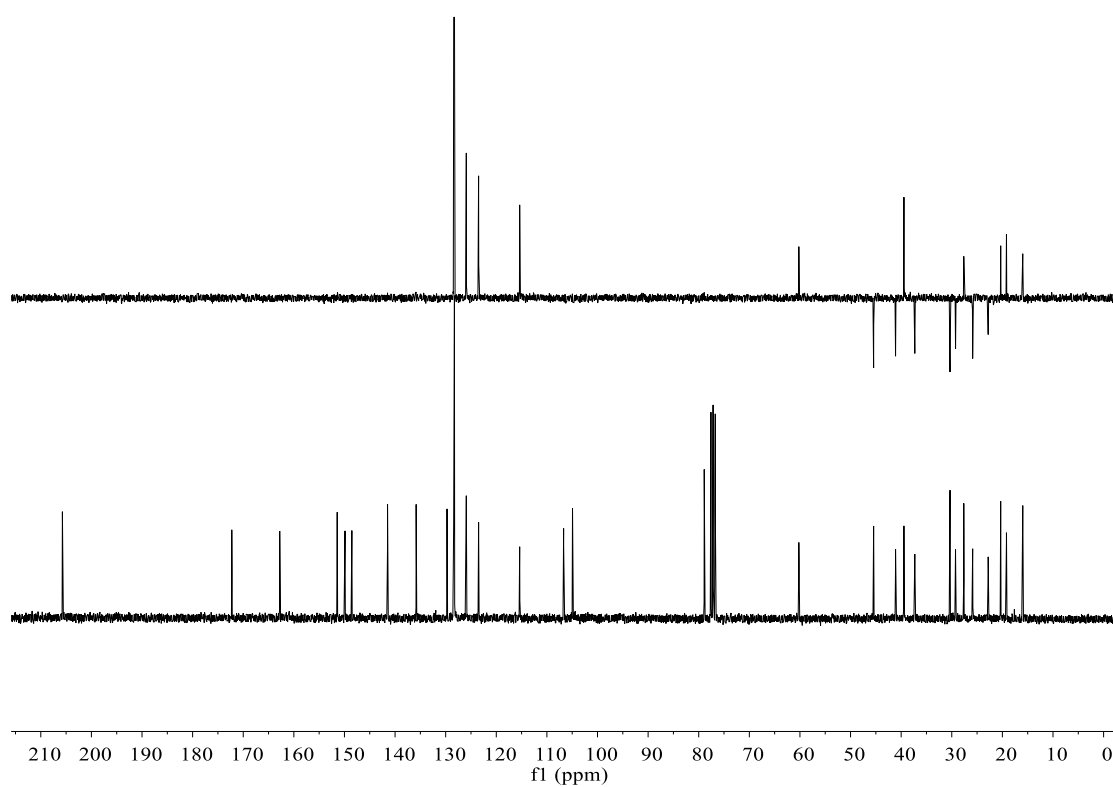

Fig. S24. DEPT-135 and  $^{13}\text{C}$  NMR spectra of **2** in  $\text{CDCl}_3$



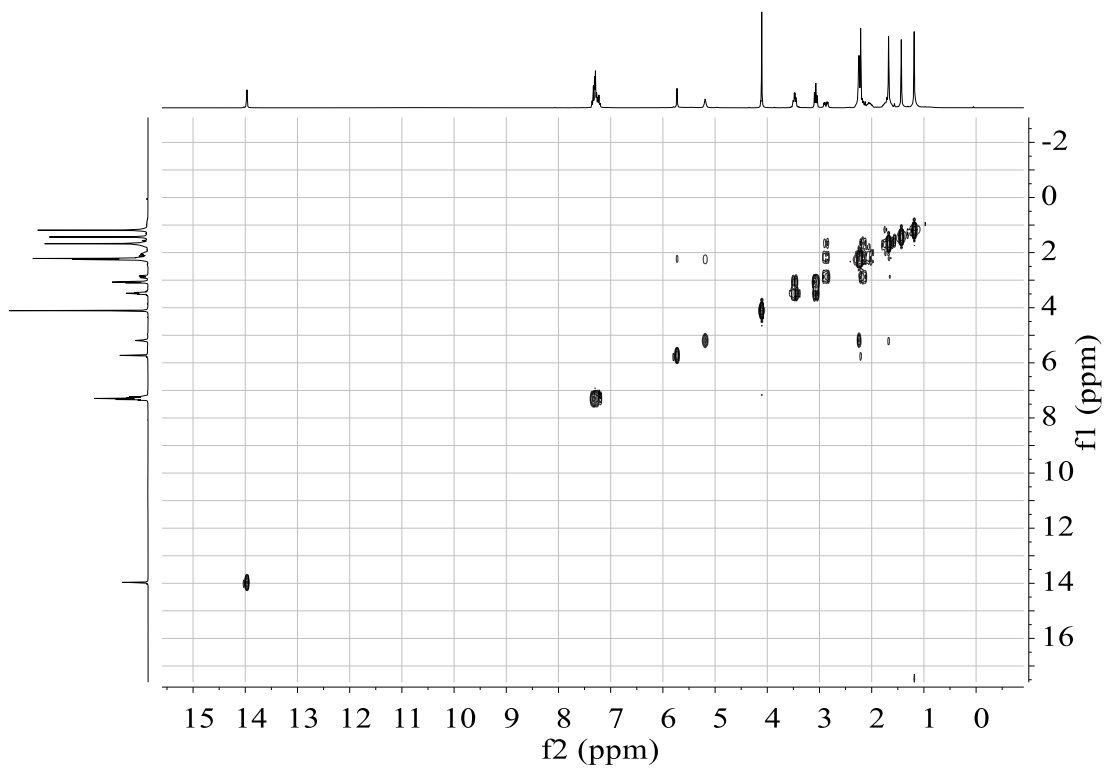

**Fig. S25.**  $^1\text{H}$ - $^1\text{H}$  COSY spectrum of **2** in  $\text{CDCl}_3$

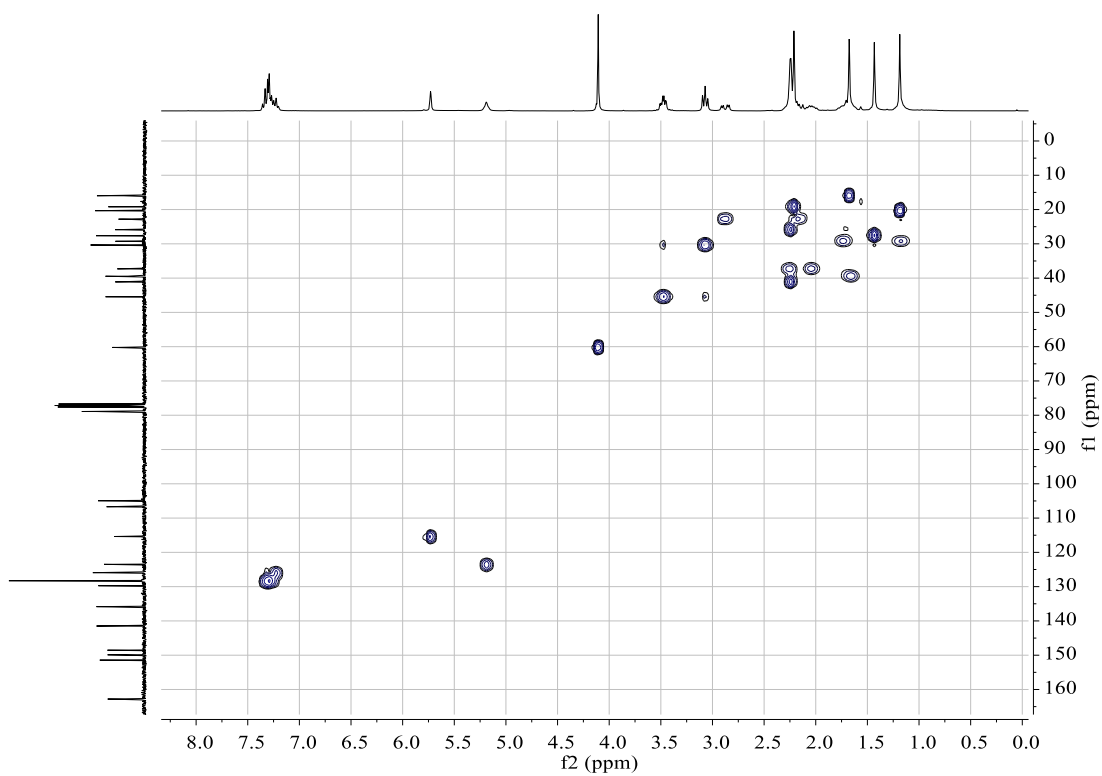

**Fig. S26.** HSQC spectrum of **2** in  $\text{CDCl}_3$

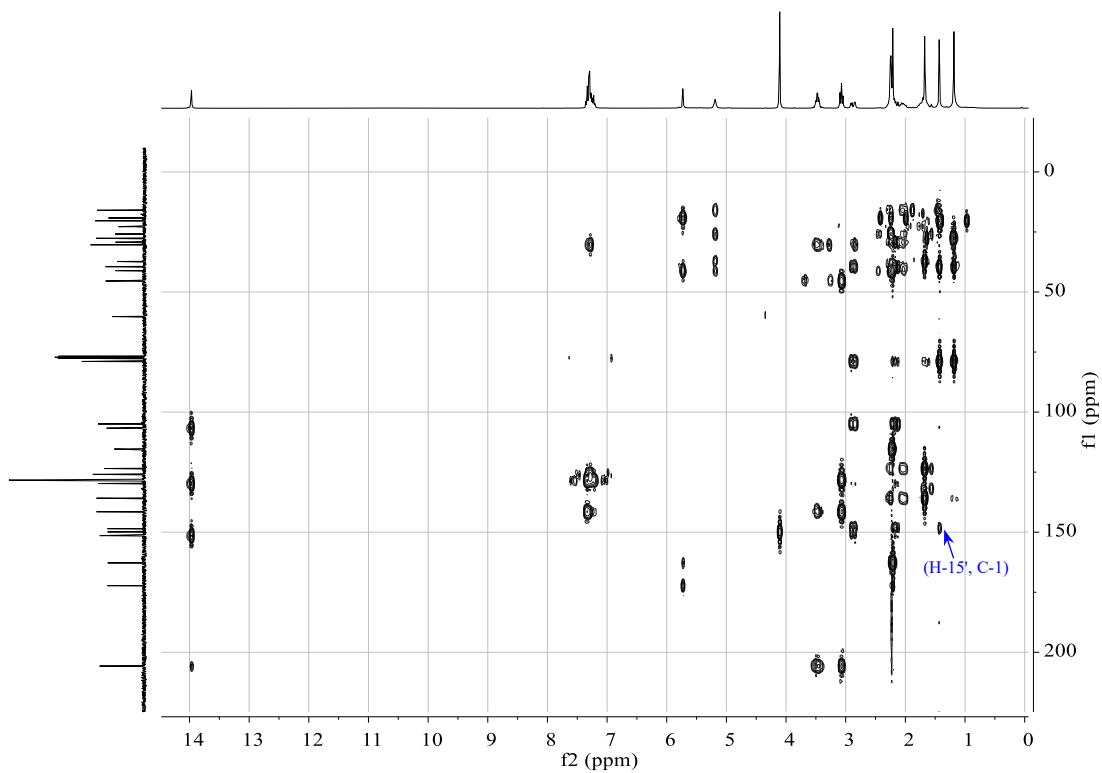

**Fig. S27.** HMBC spectrum of **2** in  $\text{CDCl}_3$

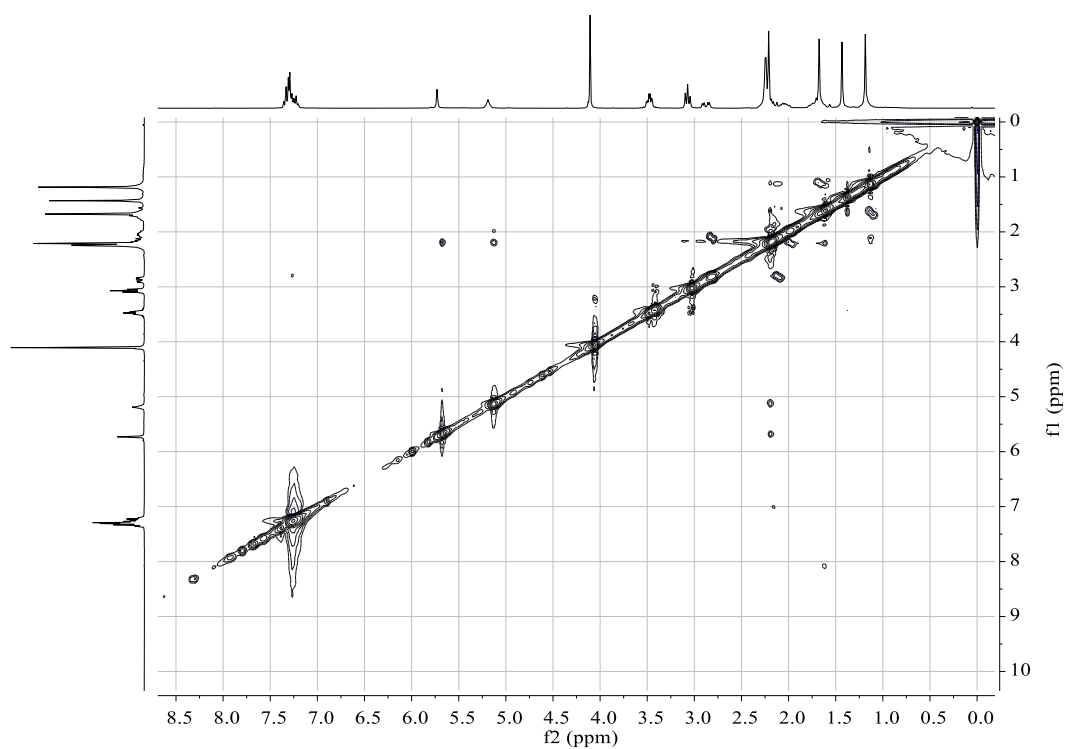

**Fig. S28.** NOESY spectrum of **2** in  $\text{CDCl}_3$

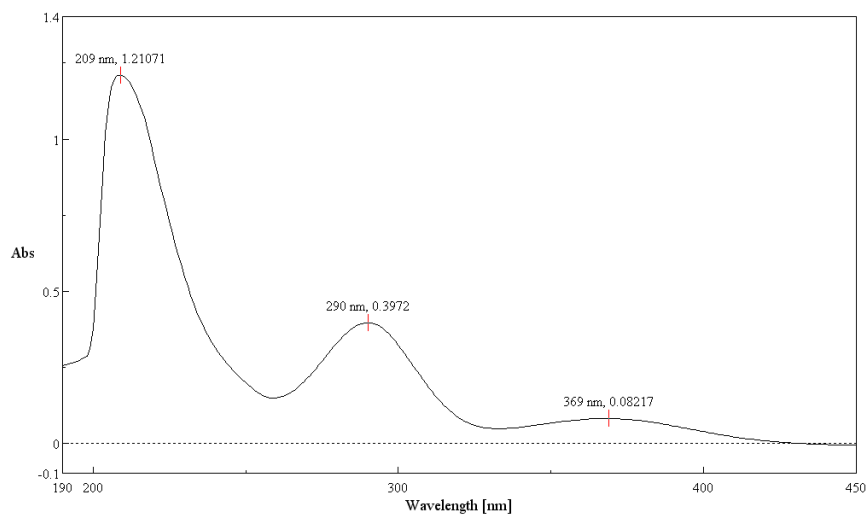

**Fig. S29.** UV spectrum of **3** in MeOH

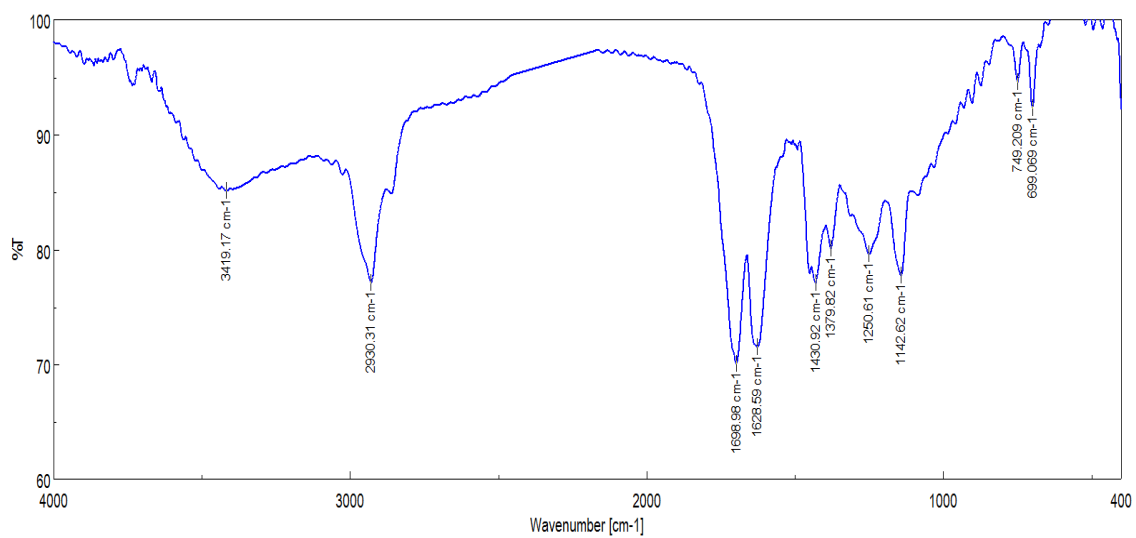

**Fig. S30.** IR spectrum of **3** (KBr disc)

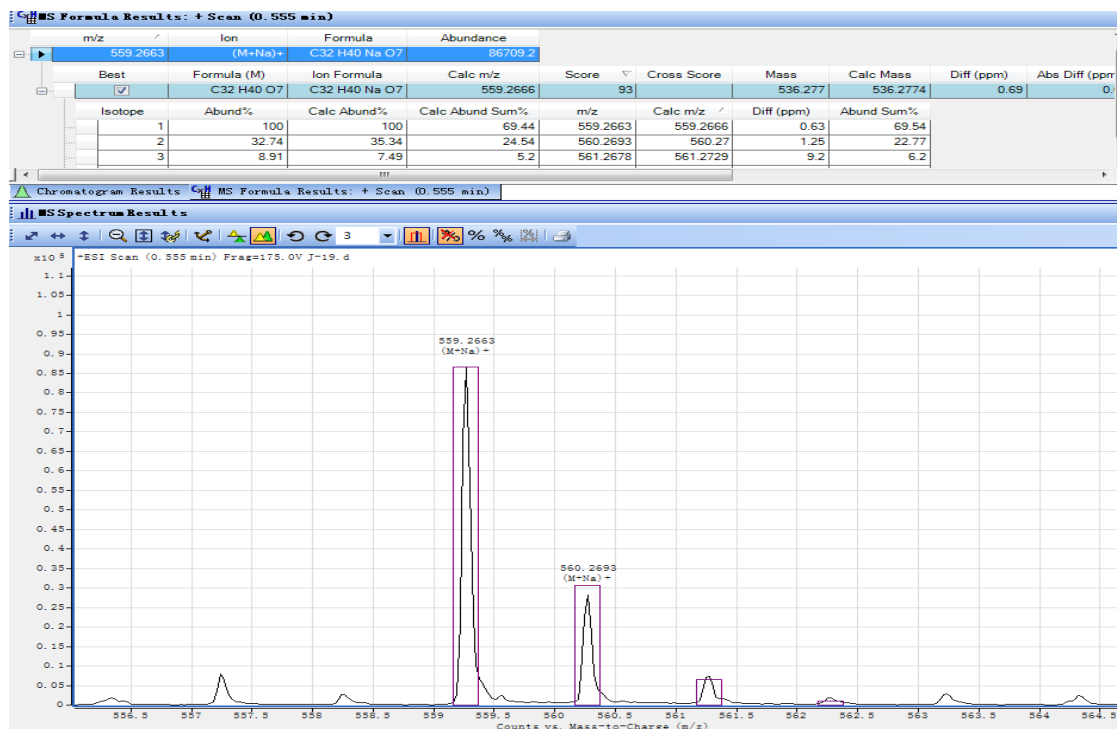

Fig. S31. HR-ESI-MS spectrum of **3**

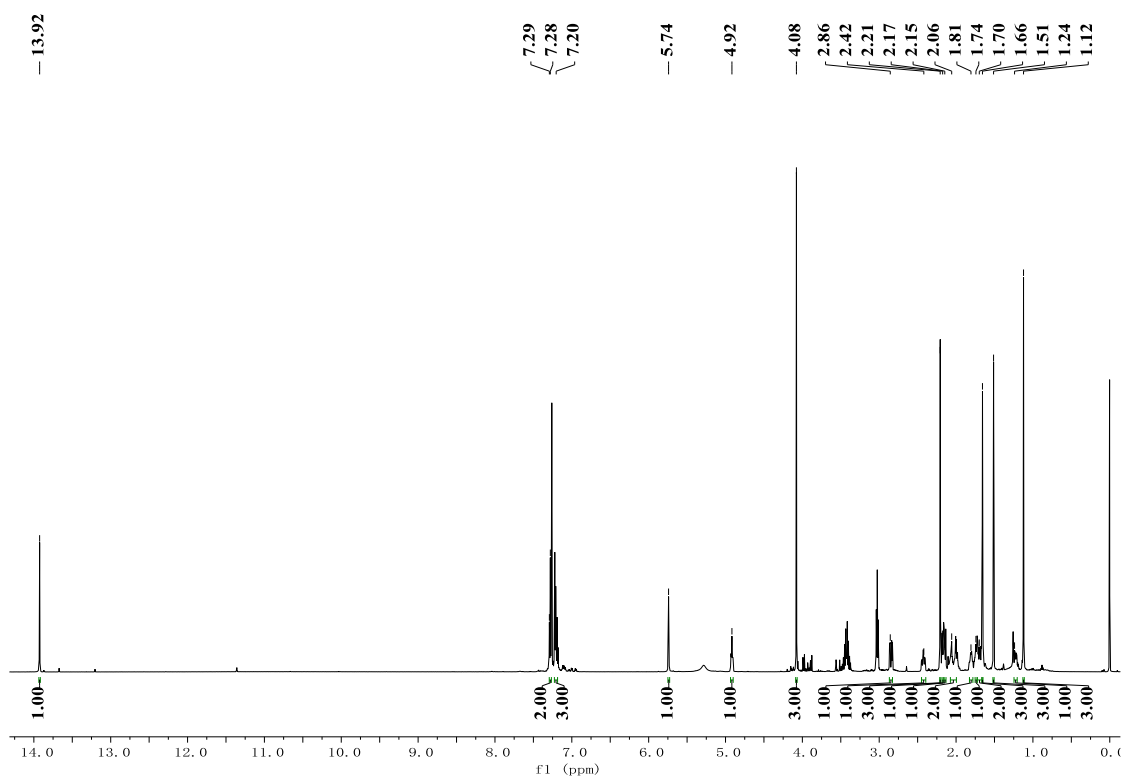

Fig. S32. <sup>1</sup>H NMR spectrum of **3** in CDCl<sub>3</sub>

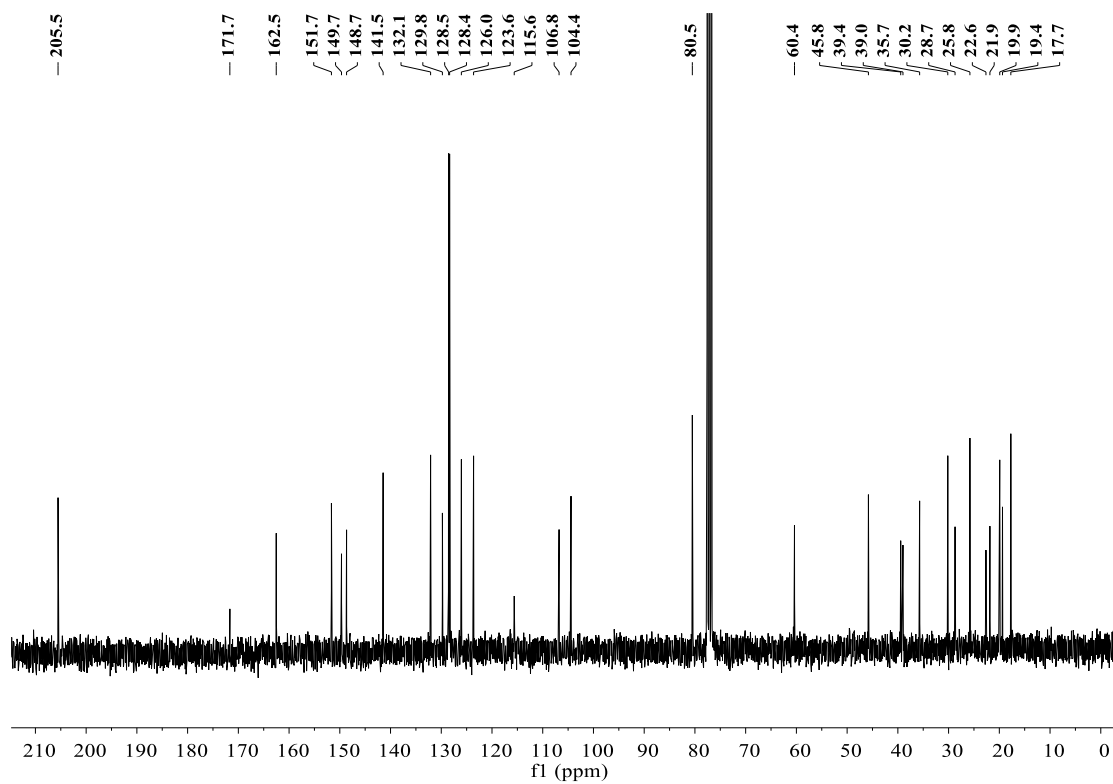

Fig. S33.  $^{13}\text{C}$  NMR spectrum of **3** in  $\text{CDCl}_3$

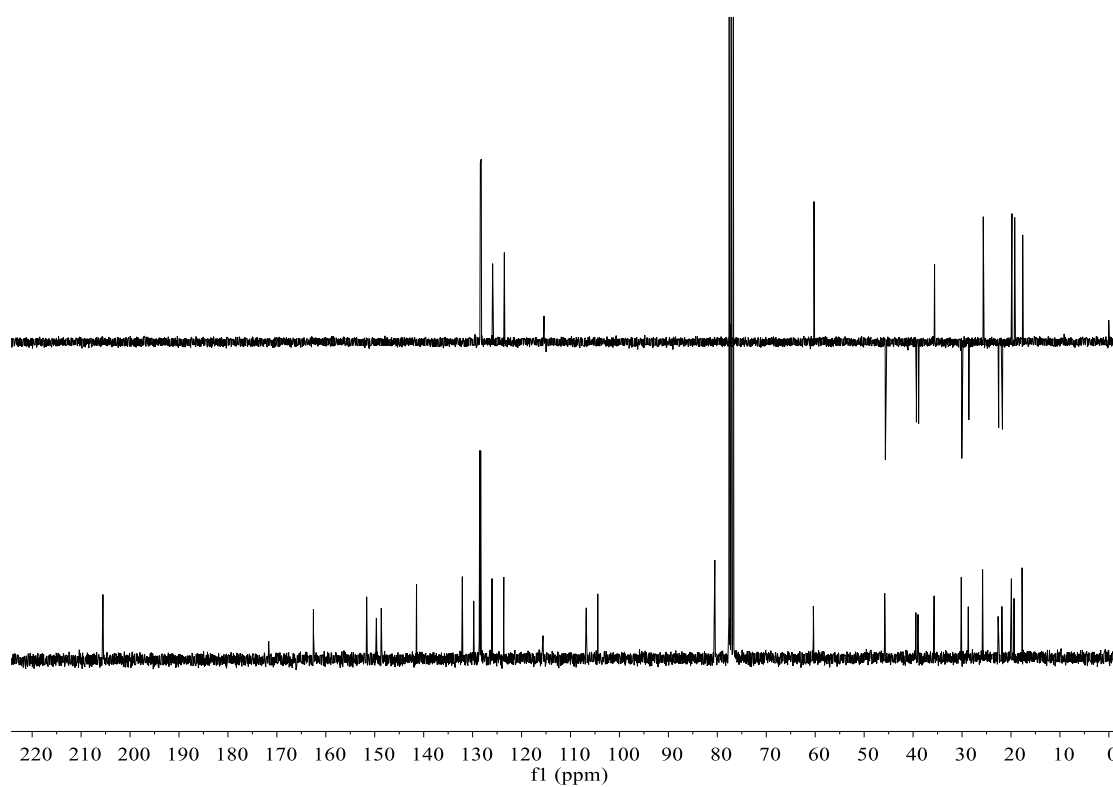

Fig. S34. DEPT-135 and  $^{13}\text{C}$  NMR spectra of **3** in  $\text{CDCl}_3$

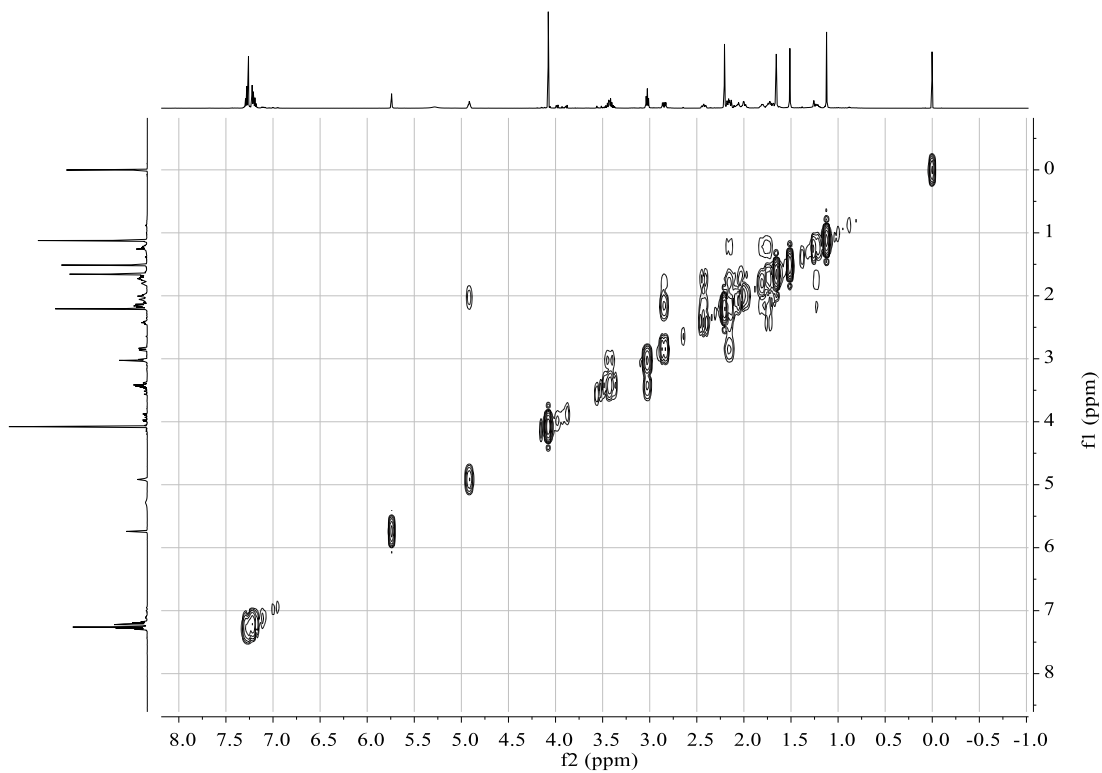

Fig. S35.  $^1\text{H}$ - $^1\text{H}$  COSY spectrum of **3** in  $\text{CDCl}_3$

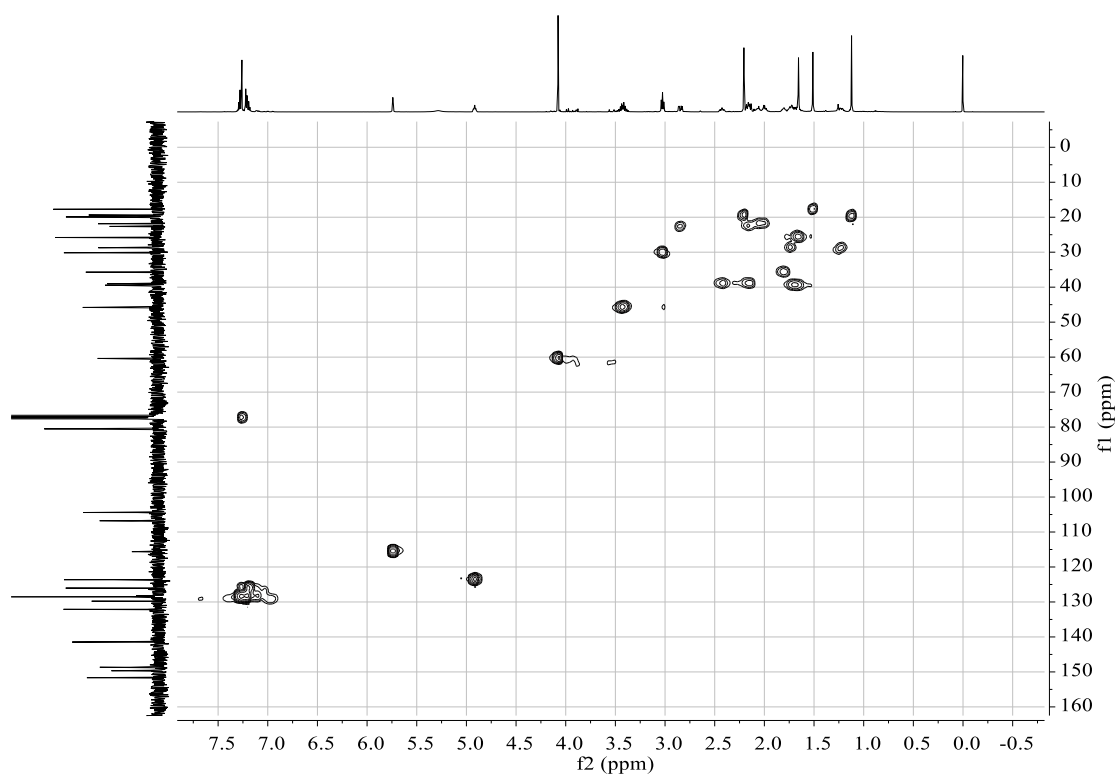

Fig. S36. HSQC spectrum of **3** in  $\text{CDCl}_3$

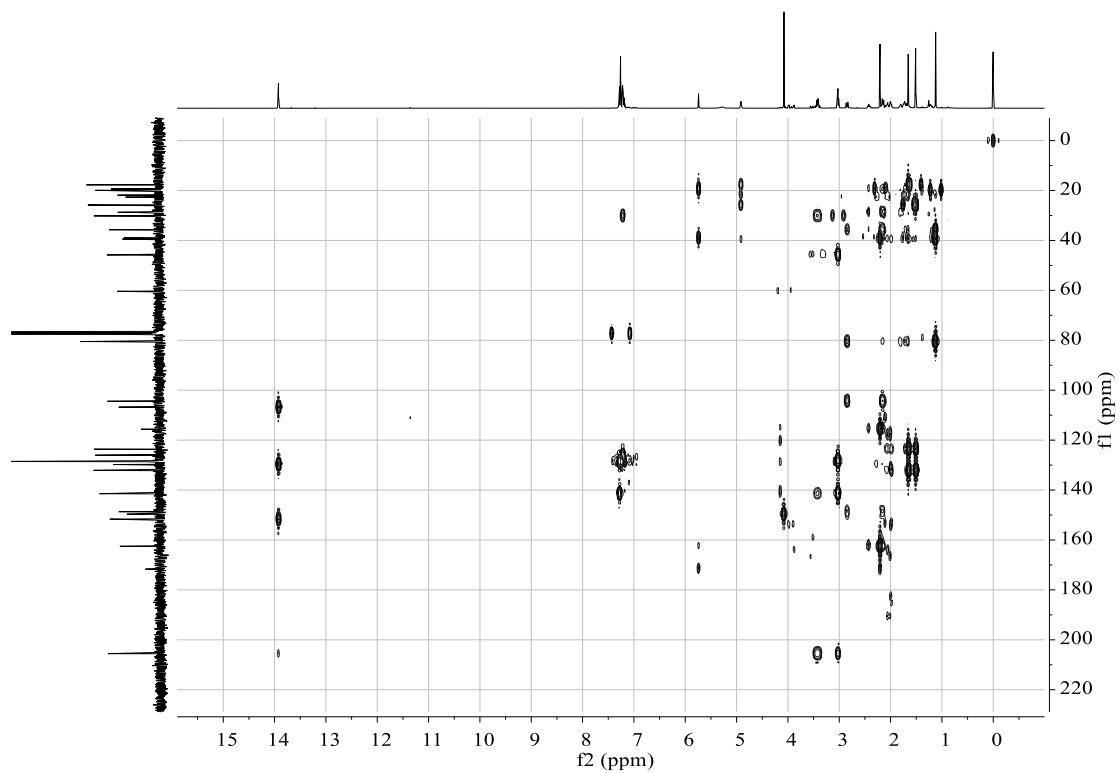

**Fig. S37.** HMBC spectrum of **3** in  $\text{CDCl}_3$

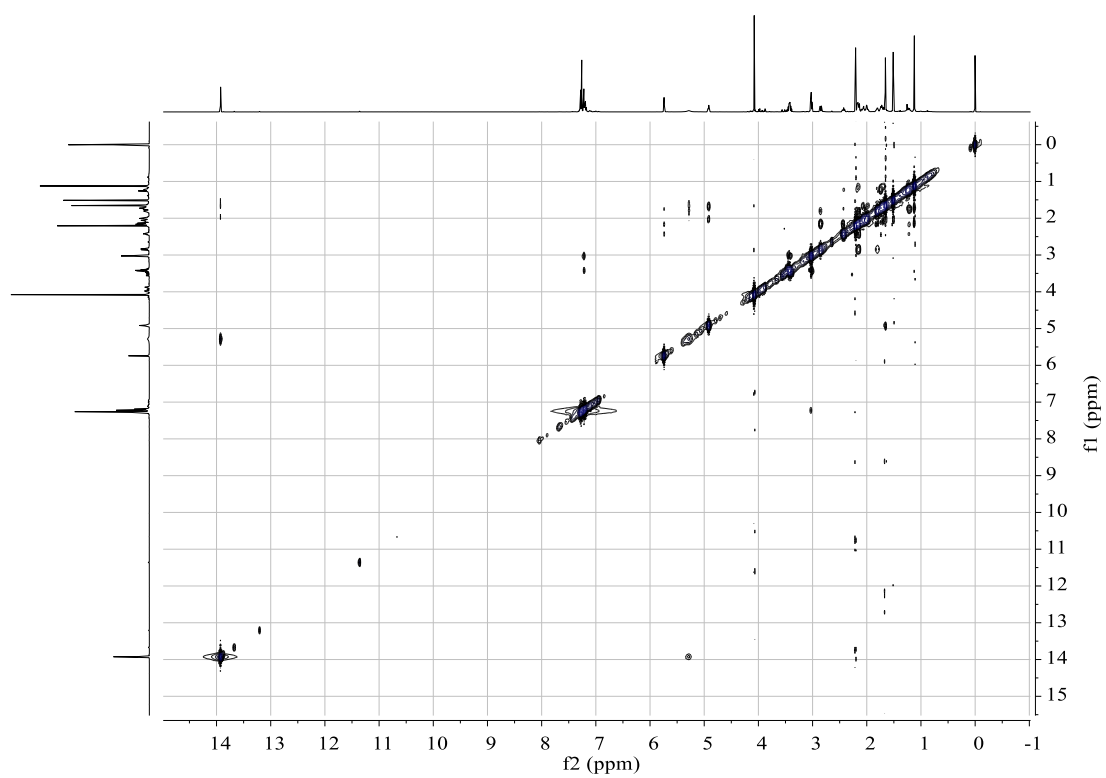

**Fig. S38.** NOESY spectrum of **3** in  $\text{CDCl}_3$

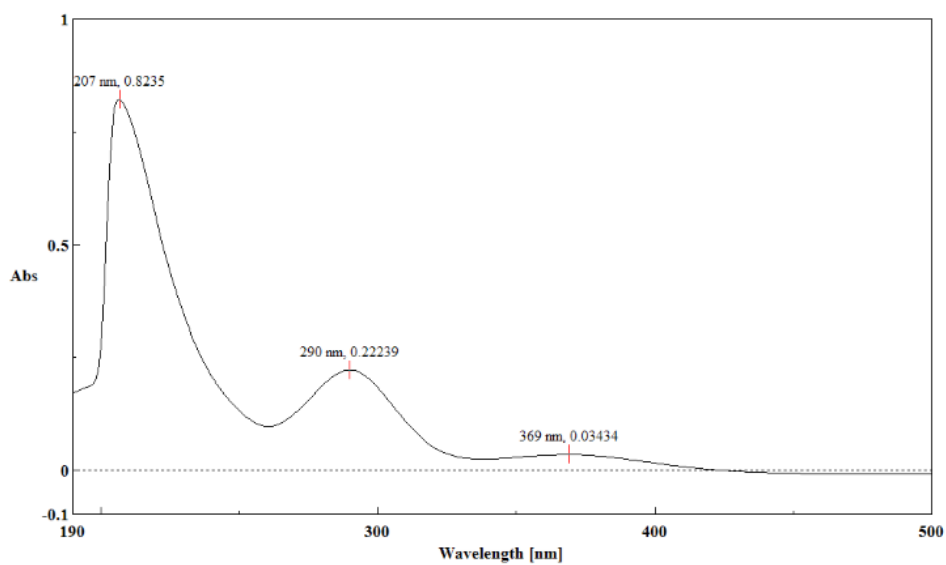

**Fig. S39.** UV spectrum of **4** in MeOH

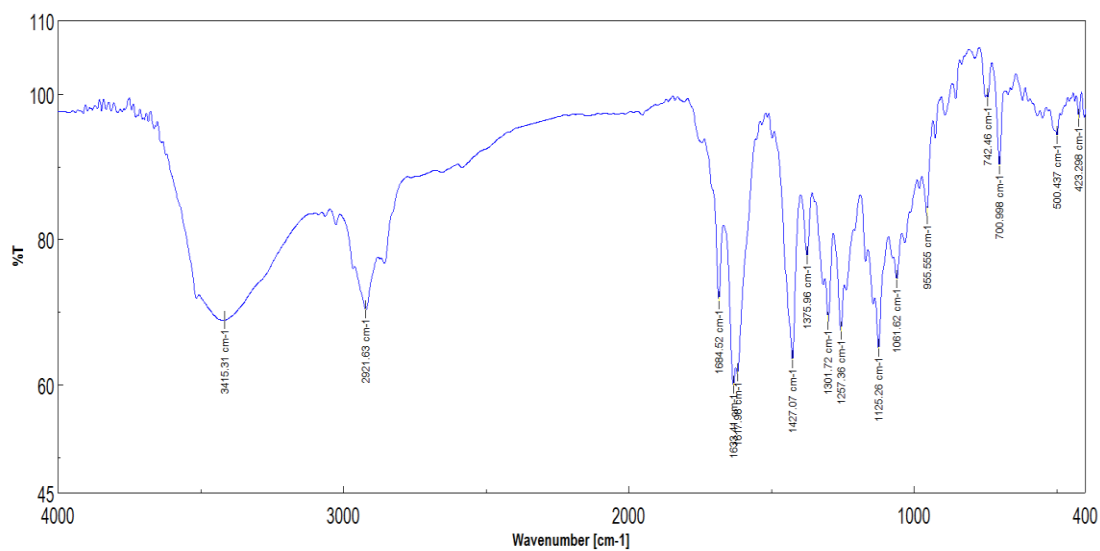

**Fig. S40.** IR spectrum of **4** (KBr disc)



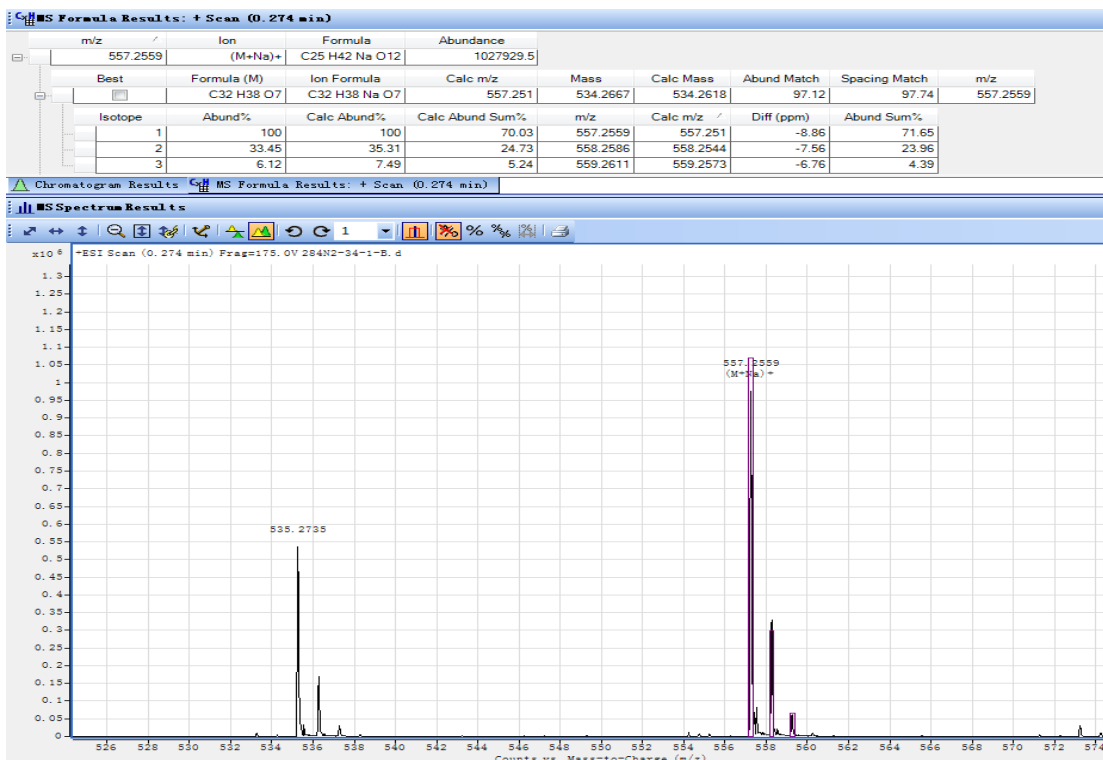

Fig. S41. HR-ESI-MS spectrum of **4**

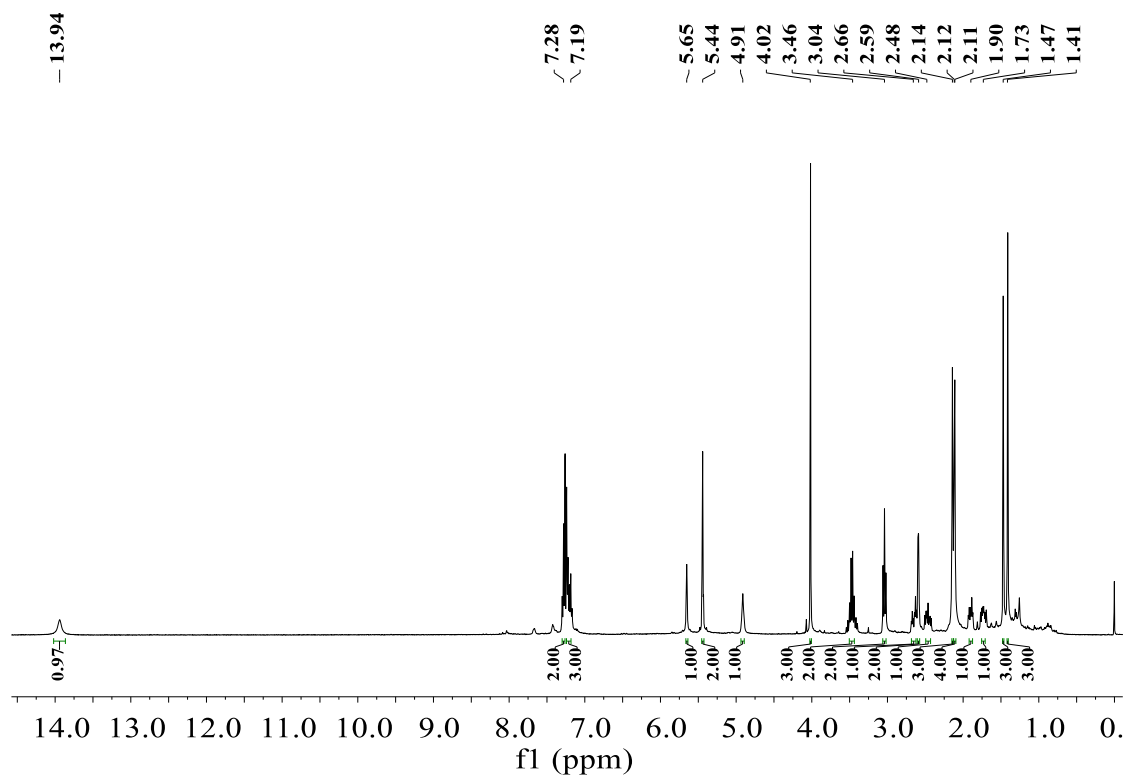

Fig. S42. <sup>1</sup>H NMR spectrum of **4** in CDCl<sub>3</sub>

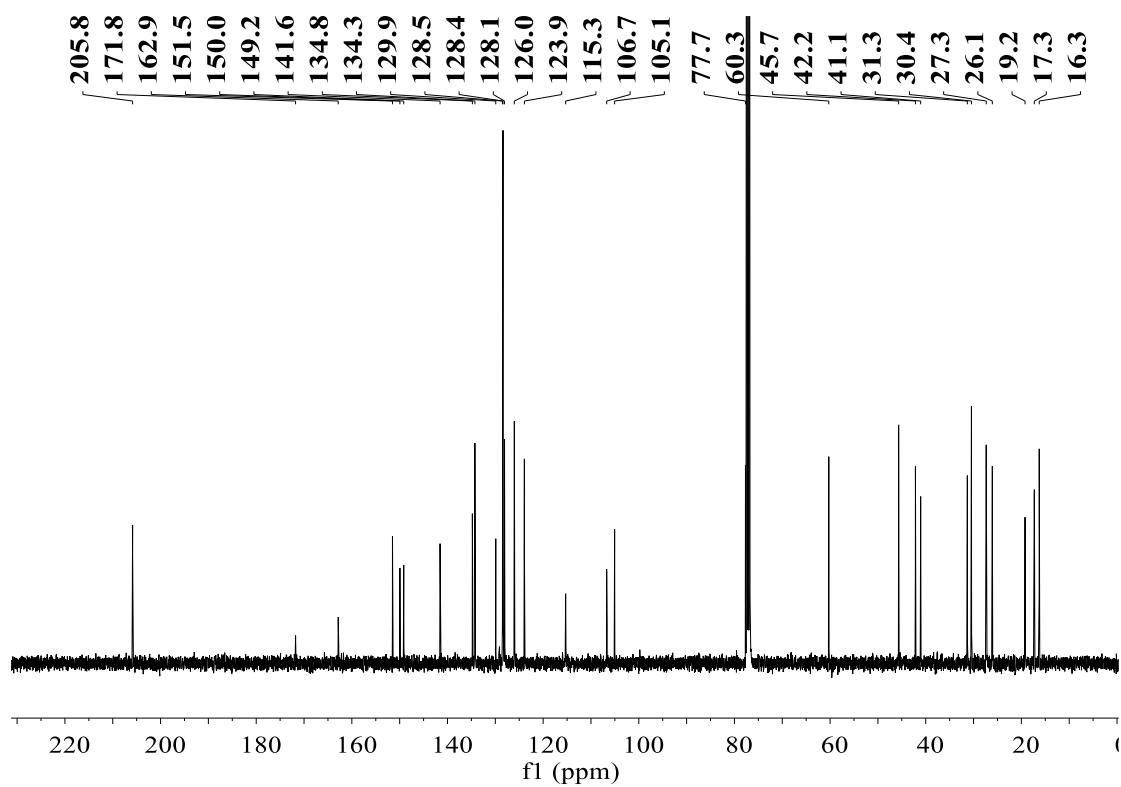

Fig. S43.  $^{13}\text{C}$  NMR spectrum of **4** in  $\text{CDCl}_3$

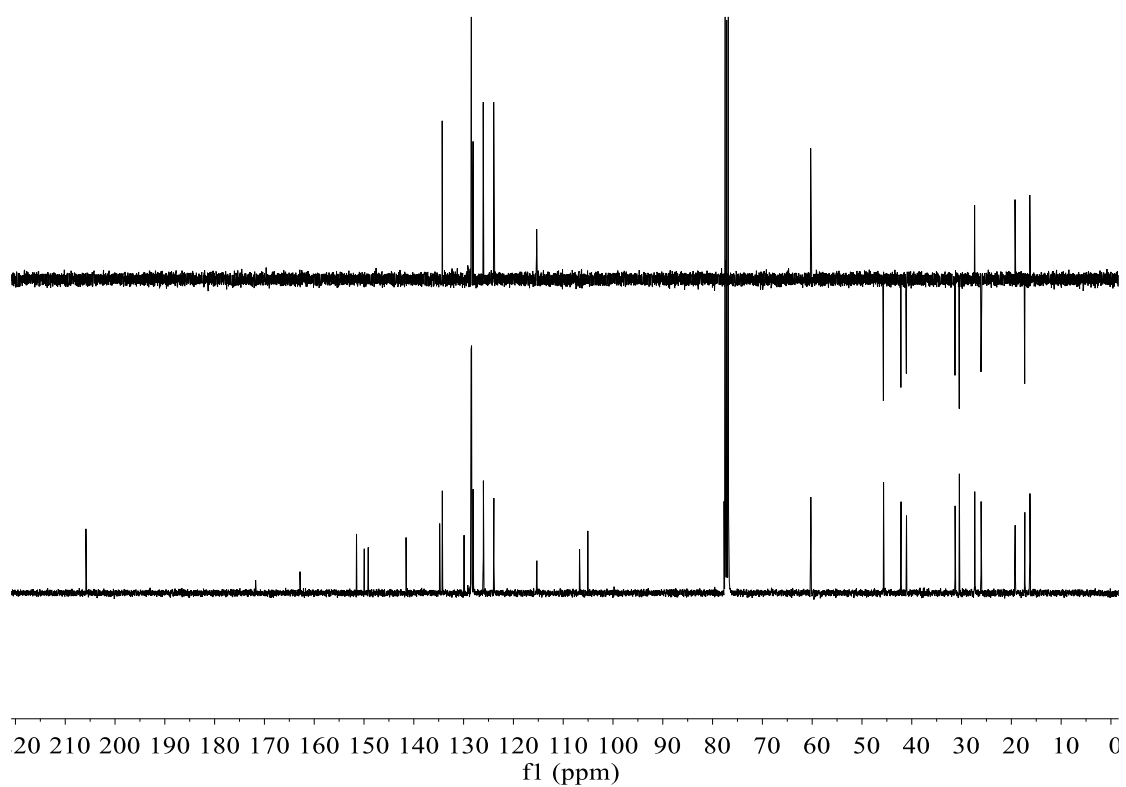

Fig. S44. DEPT-135 and  $^{13}\text{C}$  NMR spectra of **4** in  $\text{CDCl}_3$

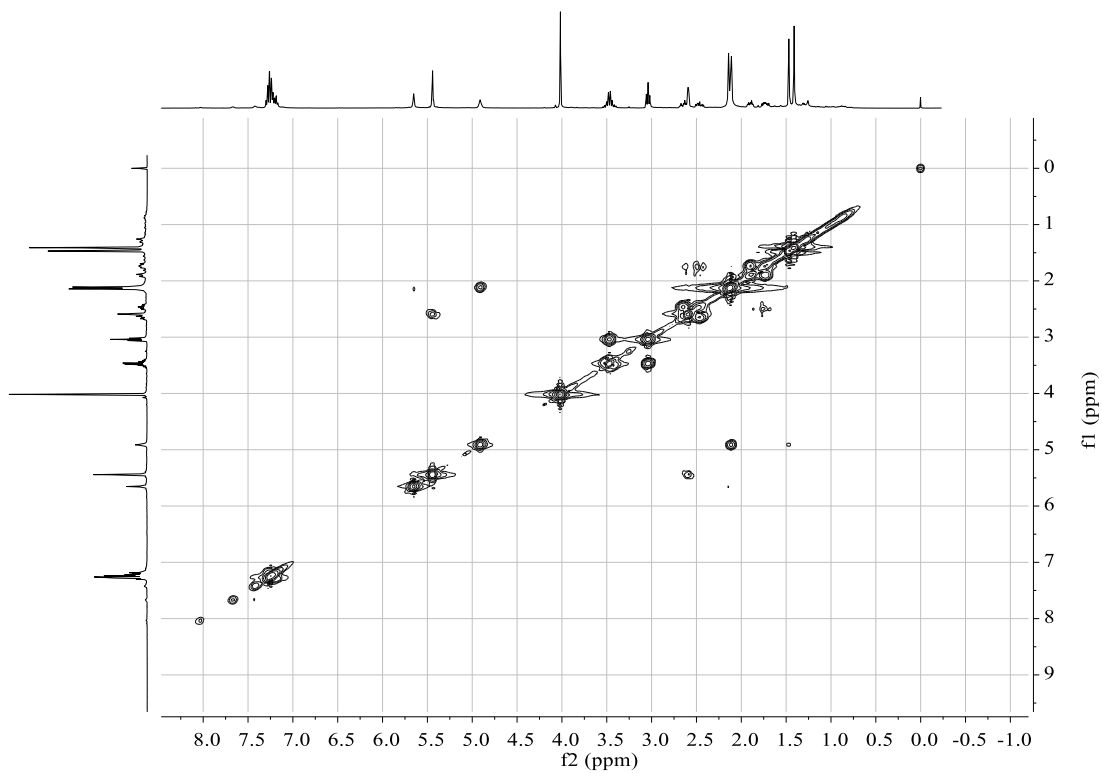

**Fig. S45.**  $^1\text{H}$ - $^1\text{H}$  COSY spectrum of **4** in  $\text{CDCl}_3$

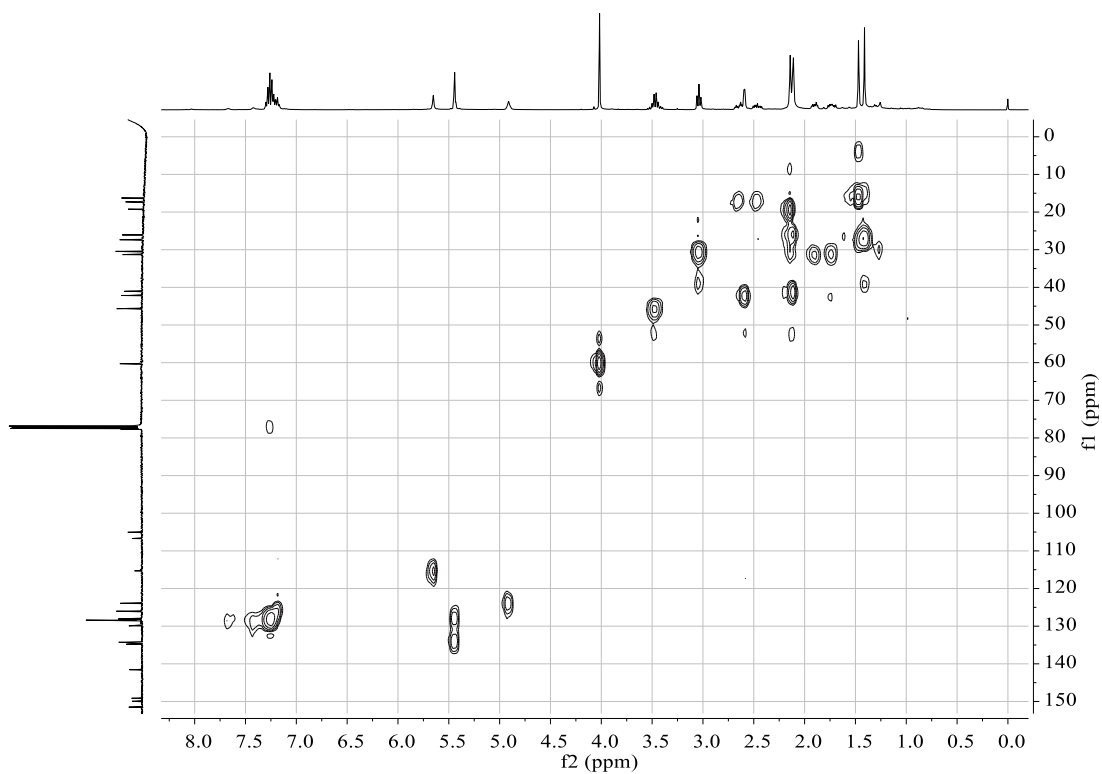

**Fig. S46.** HSQC spectrum of **4** in  $\text{CDCl}_3$

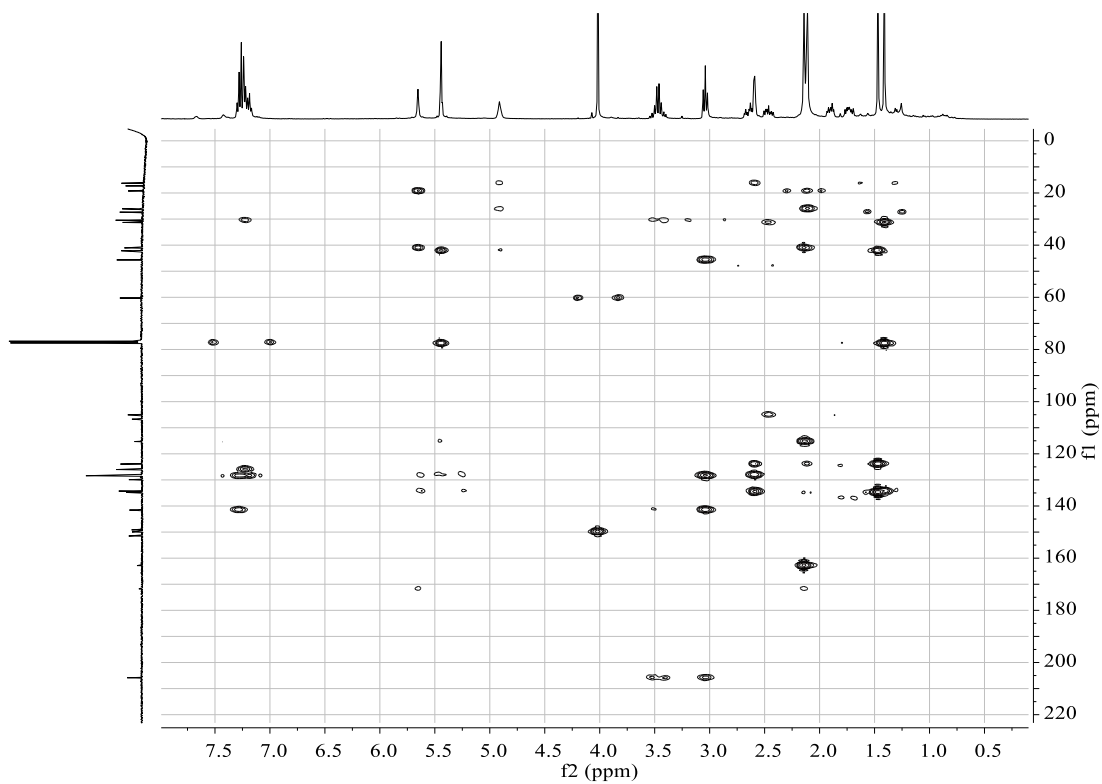

**Fig. S47.** HMBC spectrum of **4** in  $\text{CDCl}_3$

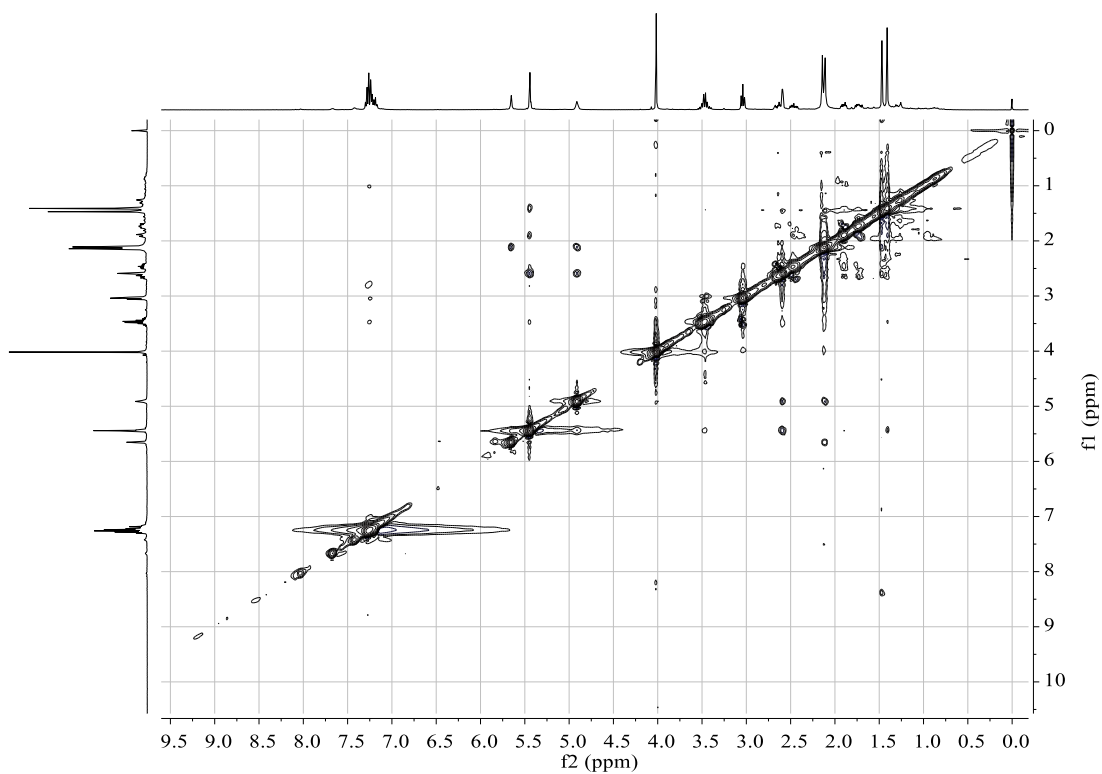

**Fig. S48.** NOESY spectrum of **4** in  $\text{CDCl}_3$

## Reference

- [1]. X. L. Zhang, Y. P. Xia, P. B. Li, Z. N. Wu, R. L. Li, J. L. Cai, Y. B. Zhang, G. C. Wang, Y. L. Li, W. Tang, W. W. Su. Discovery of cyperenoic acid as a potent and novel entry inhibitor of influenza A virus, *Antiviral Research*, **2024**, 105822.
- [2]. W. Tang, Y. Y. Li, Q. Y. Song, Z. Q. Wang, M. M. Li, Q. W. Zhang, Y. Wang, W. C. Ye, Y. L. Li. Mechanism of cross-resistance to fusion inhibitors conferred by the K394R mutation in respiratory syncytial virus fusion protein. *Journal of Virology*, **2021**, 95(20), e01205-21.
- [3]. Gaussian 09, Revision A.02, M. J. Frisch, G. W. Trucks, H. B. Schlegel, G. E. Scuseria, M. A. Robb, J. R. Cheeseman, G. Scalmani, V. Barone, B. Mennucci, G. A. Petersson, H. Nakatsuji, M. Caricato, X. Li, H. P. Hratchian, A. F. Izmaylov, J. Bloino, G. Zheng, J. L. Sonnenberg, M. Hada, M. Ehara, K. Toyota, R. Fukuda, J. Hasegawa, M. Ishida, T. Nakajima, Y. Honda, O. Kitao, H. Nakai, T. Vreven, J. A. Montgomery, Jr., J. E. Peralta, F. Ogliaro, M. Bearpark, J. J. Heyd, E. Brothers, K. N. Kudin, V. N. Staroverov, R. Kobayashi, J. Normand, K. Raghavachari, A. Rendell, J. C. Burant, S. S. Iyengar, J. Tomasi, M. Cossi, N. Rega, J. M. Millam, M. Klene, J. E. Knox, J. B. Cross, V. Bakken, C. Adamo, J. Jaramillo, R. Gomperts, R. E. Stratmann, O. Yazyev, A. J. Austin, R. Cammi, C. Pomelli, J. W. Ochterski, R. L. Martin, K. Morokuma, V. G. Zakrzewski, G. A. Voth, P. Salvador, J. J. Dannenberg, S. Dapprich, A. D. Daniels, O. Farkas, J. B. Foresman, J. V. Ortiz, J. Cioslowski, and D. J. Fox, Gaussian, Inc., Wallingford CT, **2009**.
- [4]. T. Bruhn, A. Schaumlöffel, Y. Hemberger, G. Pescitelli, SpecDis version 1.71, Berlin, Germany, **2017**, <http://specdis-software.jimdo.com>
